# Supplementary material for: Bulk Segregant Analysis Sequencing and RNA-Seq Analyses Reveal Candidate Genes Associated with Sepal Color Phenotype of Eggplant (Solanum melongena L.)
Source: Plants (Basel). 2024 May 16;13(10):1385. doi: 10.3390/plants13101385 (PMC11124939; doi:10.3390/plants13101385)
Supplement: Supplementary file 1 [file plants-13-01385-s001.zip › Supplementary Tables.xlsx]

## Sheet: Table S1
Table S1 Sequencing data summary of bulked segregant analysis
Sample	GP05	PP05	gc	pc
Total_clean_reads	296399558	294567340	328819684	316557236
Mapped(%)	98.67	98.79	98.91	99.02
Properly mapped(%)	77.01	76.77	75.84	76.34
singletons(%)	0.21	0.19	0.21	0.23
Average_sequencing_depth(X)	32.84	31.46	30.26	29.87
Coverage(%)	98.63	98.71	98.95	98.98
Coverage_at_least_4X(%)	97.78	97.66	98.16	98.23
Coverage_at_least_10X(%)	94.71	93.56	94.56	94.55
Coverage_at_least_20X(%)	70.07	64.32	60.51	58.31
Number of SNPs	4763574	4410441	4771989	4749442
Number of InDels	700232	653942	712241	707860

## Sheet: Table S2
Table S2 Purple sepal and green sepal parental and mixed pool bulked segregant analysis sequencing
Sample	Clean Reads Pairs	Clean base(bp)	Length	Q20(%)	Q30(%)	GC(%)
gc1	21552282	6465684600	150;150	97.2;94.8	92.6;88.3	42.7;42.7
gc2	23454136	7036240800	150;150	97.2;94.6	92.6;88.0	42.6;42.7
gc3	22229745	6668923500	150;150	97.2;95.0	92.5;88.7	42.5;42.6
GP05c1	23319241	6995772300	150;150	97.3;95.6	92.8;89.7	42.6;42.6
GP05c2	24097793	7229337900	150;150	97.3;95.5	92.7;89.5	42.5;42.6
GP05c3	20138403	6041520900	150;150	96.6;94.3	91.1;86.9	42.6;42.7
pc1	24237235	7271170500	150;150	97.2;94.7	92.6;88.2	42.7;42.7
pc2	21060856	6318256800	150;150	97.2;94.8	92.6;88.3	42.6;42.7
pc3	23216478	6964943400	150;150	97.2;94.8	92.6;88.4	42.5;42.5
PP05c1	22385279	6715583700	150;150	97.2;95.2	92.6;89.2	42.7;42.8
PP05c2	24393077	7317923100	150;150	97.3;95.2	92.9;89.1	42.9;43.0
PP05c3	19729029	5918708700	150;150	97.2;95.3	92.7;89.3	43.1;43.2
a: gc1, gc2 and gc3 represent three biological replicates of GC;pc1, pc2 and pc3 represent three biological replicates of PC; GP1, GP2 and GP3 represent three biological replicates of GP.PP1, PP2 and PP3 represent three biological replicates of PP.

## Sheet: Table S3
Table S3 Summary of transcriptome sequencing data
Sample	Total Reads	Total mapping rate	Left reads mapped	Left reads multiple mapped	Right reads mapped	Right reads mult iple mapped	Clean Reads Pairs
gc1	43104564	34,901,912(81.0%)	17,982,693(83.4%)	528,491(2.9%)	16,919,219(78.5%)	492,728(2.9%)	20329631
gc2	46908272	38,190,946(81.4%)	19,721,406(84.1%)	628,856(3.2%)	18,469,540(78.7%)	583,719(3.2%)	19125870
gc3	44459490	36,371,567(81.8%)	18,706,546(84.2%)	571,596(3.1%)	17,665,021(79.5%)	537,142(3.0%)	21079651
pc1	48474470	39,789,218(82.1%)	20,507,941(84.6%)	672,592(3.3%)	19,281,277(79.6%)	627,219(3.3%)	21084568
pc2	42121712	34,190,011(81.2%)	17,618,444(83.7%)	570,820(3.2%)	16,571,567(78.7%)	532,062(3.2%)	20367793
pc3	46432956	36,811,729(79.3%)	18,966,680(81.7%)	616,416(3.2%)	17,845,049(76.9%)	573,998(3.2%)	20196854
PP051	44770558	36,591,177(81.7%)	18,756,178(83.8%)	602,284(3.2%)	17,834,999(79.7%)	568,460(3.2%)	19539874
PP052	48786154	40,594,689(83.2%)	20,843,212(85.4%)	668,750(3.2%)	19,751,477(81.0%)	628,446(3.2%)	20456879
PP053	39458058	32,410,957(82.1%)	16,609,354(84.2%)	547,632(3.3%)	15,801,603(80.1%)	517,222(3.3%)	19856479
GP051	46638482	38,624,859(82.8%)	19,751,418(84.7%)	633,534(3.2%)	18,873,441(80.9%)	600,658(3.2%)	20800746
GP052	48195586	39,385,906(81.7%)	20,171,542(83.7%)	612,033(3.0%)	19,214,364(79.7%)	579,303(3.0%)	21001889
GP053	40276806	32,528,488(80.8%)	16,787,779(83.4%)	546,103(3.3%)	15,740,709(78.2%)	506,601(3.2%)	19005029
gc1, gc2 and gc3 represent three biological replicates of GC;pc1, pc2 and pc3 represent three biological replicates of PC; GP1, GP2 and GP3 represent three biological replicates of GP.PP1, PP2 and PP3 represent three biological replicates of PP.

## Sheet: Table S4
Table S4 Screening of SSR primers using capillary electrophoresis (Bioptic Qsep400)
NO.	Sample name	primer SSR44	primer SSR47	primer SSR50	primer SSR56	primer SSR58	primer SSR63	primer SSR72	phenotype
		10-75515147	10-75708940	10-75764214	10-76086636	10-76130174	10-76300946	10-77683697
1	A-1	1	1	1	1	1	1	1	Purple parent
2	C-1	2	2	2	2	2	2	2	green parent
7	A1	1	1	1	1	1	1	1	purple
8	A2	1	1	1	1	1	1	1	purple
9	A3	1	1	1	1	1	1	1	purple
10	A4	1	1	1	1	1	1	1	purple
12	A5	1	1	1	1	1	1	1	purple
13	A6	1	1	1	1	1	1	1	purple
14	A7	1	1	1	1	1	1	1	purple
15	A8	1	1	1	1	1	1	1	purple
16	A9	1	1	1	1	1	1	1	purple
17	A10	1	1	1	1	1	1	1	purple
18	A11	1	3	3	3	3	1	1	purple
19	A12	1	1	1	1	1	1	1	purple
20	C1	2	2	2	2	2	2	2	green
21	C2	2	2	2	2	2	2	2	green
22	C3	2	2	2	2	2	2	2	green
23	C4	2	2	2	2	2	2	2	green
24	C5	2	2	2	2	2	2	2	green
25	C6	2	2	2	2	2	2	2	green
26	C7	2	2	2	2	2	2	2	green
27	C8	2	2	2	2	2	2	2	green
28	C9	2	2	2	2	2	2	2	green
29	C10	2	2	2	2	2	2	2	green
30	C11	2	2	2	2	2	2	2	green
31	C12	2	2	2	2	2	2	2	green

## Sheet: Table S5
Table S5 Identification of eggplant sepal color by CAPS markers
Number	Description of resource traits	Marker size	Test results
A1	Green sepals	277bp, 238bp	No
A2	Green sepals	238bp	Yes
A3	Green sepals	-	-
A4	Green sepals	238bp	Yes
A5	Green sepals	277bp, 238bp	No
A6	Green sepals	238bp	Yes
A7	Green sepals	238bp	Yes
A8	Green sepals	238bp	Yes
A9	Green sepals	277bp	Yes
A10	Green sepals	238bp	Yes
A11	Green sepals	238bp	Yes
A12	Green sepals	238bp	Yes
A13	Green sepals	238bp	Yes
A14	Green sepals	238bp	Yes
A15	Green sepals	238bp	Yes
A16	Green sepals	238bp	Yes
A17	Green sepals	238bp	Yes
A18	Green sepals	238bp	Yes
A19	Green sepals	238bp	Yes
A20	Green sepals	238bp	Yes
A21	Green sepals	238bp	Yes
A22	Green sepals	238bp	Yes
A23	Green sepals	238bp	Yes
A24	Green sepals	277bp	Yes
B1	Green sepals	277bp	Yes
B2	Green sepals	277bp	Yes
B3	Green sepals	277bp	Yes
B4	Green sepals	277bp	Yes
B5	Green sepals	277bp	Yes
B6	Green sepals	238bp	Yes
B7	Green sepals	277bp	Yes
B8	Green sepals	277bp	Yes
B9	Middle color	277bp, 238bp	Yes
B10	Middle color	277bp, 238bp	Yes
B11	Middle color	277bp	No
B12	Middle color	277bp, 238bp	Yes
B13	Middle color	277bp	No
B14	Middle color	277bp, 238bp	Yes
B15	Middle color	-	-
B16	Middle color	277bp, 238bp	Yes
B17	Middle color	277bp, 238bp	Yes
B18	Middle color	277bp, 238bp	Yes
B19	Middle color	277bp, 238bp	Yes
B20	Green sepals	238bp	Yes
B21	Green sepals	238bp	Yes
B22	Green sepals	238bp	Yes
B23	Green sepals	-	-
B24	Green sepals	238bp	Yes

## Sheet: Table S6
Table S6 SSR primer sequences in this study
number	name	location	primer sequence
1	SSR44	10_75515147	CCAAAAATCAGCAAGGGAAA
		10_75515147	TGCTAGCTCCCAGAAAGCAT
2	SSR47	10_75708940	TCTGAGAACCGAGGAGGAAA
		10_75708940	GCGTGTTGCTTCACTCTTCA
3	SSR50	10_75764214	GATTTGACCTGACCCACACC
		10_75764214	TGTCCTTAGTCGTCCTAAGATTGA
4	SSR55	10_76023105	AGCACCAATTCATAGTCCCAA
		10_76023105	GGGGTGTTAAGCCATGTAGC
5	SSR56	10_76086636	TGTCTCAACAAATTGGTTATATTTCAA
		10_76086636	CAGCCCTAAGCAAGATCCAA
6	SSR58	10_76130174	CTGTTGAAACCCAGGCTTGT
		10_76130174	TCACCTAGGAGGGAAAGTGG
7	SSR63	10_76300946	GGGGTTATTGATATATTCTGCCA
		10_76300946	TAATTAACCAACCGGACCCA
8	SSR72	10_77683697	TTCCCTTTATTAGCATGCCC
		10_77683697	CCCTTACCTTCTTCCCCAAG
9	CAPS120	10_80307823	TCATGTTCCATGTGATTGCC
		10_80307823	TCCCTCCGGAAATTCTTCTT

## Sheet: Table S7
Table S7 Summary of all genes between two molecular markers
#ID	COG_class	COG_class_annotation	GO_annotation	KEGG_annotation	KOG_class	KOG_class_annotation	Pfam_annotation	Swissprot_annotation	TrEMBL_annotation	eggNOG_class	eggNOG_class_annotation	nr_annotation
SMEL4.1_10g016400.1	--	--	Molecular Function: molecular_function (GO:0003674);; Molecular Function: catalytic activity (GO:0003824);; Molecular Function: 1-phosphatidylinositol 4-kinase activity (GO:0004430);; Molecular Function: binding (GO:0005488);; Molecular Function: protein binding (GO:0005515);; Biological Process: cellular protein modification process (GO:0006464);; Biological Process: protein phosphorylation (GO:…	K14544|3.6e-55|csl:COCSUDRAFT_65874|K14544 U3 small nucleolar RNA-associated protein 22 | (RefSeq) hypothetical protein	[T]	Signal transduction mechanisms	Phosphatidylinositol 3- and 4-kinase	Phosphatidylinositol 4-kinase gamma 7 OS=Arabidopsis thaliana OX=3702 GN=PI4KG7 PE=1 SV=2	PI3K/PI4K domain-containing protein OS=Solanum lycopersicum OX=4081 PE=4 SV=1	T	Signal transduction mechanisms	Phosphatidylinositol 4-kinase gamma 7 [Capsicum annuum]
SMEL4.1_10g016410.1	[L]	Replication, recombination and repair	Biological Process: base-excision repair (GO:0006284);; Molecular Function: DNA-3-methyladenine glycosylase activity (GO:0008725);	K01246|3.6e-108|sot:102599707|K01246 DNA-3-methyladenine glycosylase I [EC:3.2.2.20] | (RefSeq) DNA-3-methyladenine glycosylase-like	--	--	Methyladenine glycosylase	--	DNA-3-methyladenine glycosylase OS=Capsicum annuum OX=4072 GN=LOC107846951 PE=4 SV=1	L	Replication, recombination and repair	PREDICTED: DNA-3-methyladenine glycosylase-like [Solanum tuberosum]
SMEL4.1_10g016420.1	--	--	Molecular Function: molecular_function (GO:0003674);; Molecular Function: nucleic acid binding (GO:0003676);; Molecular Function: RNA binding (GO:0003723);; Molecular Function: catalytic activity (GO:0003824);; Molecular Function: nuclease activity (GO:0004518);; Molecular Function: endonuclease activity (GO:0004519);; Molecular Function: binding (GO:0005488);; Cellular Component: cellular_compon…	K17710|2.3e-07|csat:104779562|K17710 pentatricopeptide repeat domain-containing protein 1 | (RefSeq) putative pentatricopeptide repeat-containing protein At2g02150	[R]	General function prediction only	PPR repeat family	Autophagy-related protein 18f OS=Arabidopsis thaliana OX=3702 GN=ATG18F PE=2 SV=1	Pentatricopeptide repeat-containing protein OS=Solanum tuberosum OX=4113 GN=102580185 PE=4 SV=1	S	Function unknown	PREDICTED: putative pentatricopeptide repeat-containing protein At1g13630 isoform X1 [Solanum tuberosum]
SMEL4.1_10g016430.1	[I]	Lipid transport and metabolism	Molecular Function: catalytic activity (GO:0003824);	K07517|8.5e-107|sot:102579860|K07517 Delta3-Delta2-enoyl-CoA isomerase [EC:5.3.3.8] | (RefSeq) enoyl-CoA delta isomerase 1, peroxisomal-like	--	--	BURP domain	Enoyl-CoA delta isomerase 1, peroxisomal OS=Arabidopsis thaliana OX=3702 GN=ECI1 PE=1 SV=1	Uncharacterized protein OS=Solanum lycopersicum OX=4081 PE=4 SV=1	I	Lipid transport and metabolism	hypothetical protein EJD97_013362 [Solanum chilense]
SMEL4.1_10g016440.1	--	--	Molecular Function: UDP-glycosyltransferase activity (GO:0008194);	K23260|2.4e-68|atr:18438282|K23260 scopoletin glucosyltransferase [EC:2.4.1.128] | (RefSeq) scopoletin glucosyltransferase	[GC]	--	UDP-glucoronosyl and UDP-glucosyl transferase	UDP-glycosyltransferase 89A2 OS=Arabidopsis thaliana OX=3702 GN=UGT89A2 PE=2 SV=1	Putative glycosyltransferase OS=Solanum aculeatissimum OX=267265 GN=SaGT6 PE=2 SV=1	H	Coenzyme transport and metabolism	putative glycosyltransferase [Solanum aculeatissimum]
SMEL4.1_10g016450.1	[T]	Signal transduction mechanisms	Biological Process: proteolysis (GO:0006508);; Molecular Function: serine-type peptidase activity (GO:0008236);	K01076|9.6e-167|nau:109207638|K01076 abhydrolase domain-containing protein 17 [EC:3.1.2.22] | (RefSeq) protein ABHD17C-like	[R]	General function prediction only	Serine aminopeptidase, S33	--	Hydrolase_4 domain-containing protein OS=Nicotiana attenuata OX=49451 GN=A4A49_16297 PE=4 SV=1	S	Function unknown	PREDICTED: protein ABHD17C-like [Nicotiana attenuata]
SMEL4.1_10g016460.1	[O]	Posttranslational modification, protein turnover, chaperones	Molecular Function: ATP binding (GO:0005524);; Biological Process: protein folding (GO:0006457);; Molecular Function: unfolded protein binding (GO:0051082);	K09487|0.0e+00|sot:102578539|K09487 heat shock protein 90kDa beta | (RefSeq) heat shock protein 90-5, chloroplastic	[O]	Posttranslational modification, protein turnover, chaperones	Hsp90 protein	Heat shock protein 90-5, chloroplastic OS=Arabidopsis thaliana OX=3702 GN=HSP90-5 PE=1 SV=1	Heat shock protein 90 OS=Solanum tuberosum OX=4113 GN=102578539 PE=3 SV=1	O	Posttranslational modification, protein turnover, chaperones	PREDICTED: heat shock protein 90-5, chloroplastic [Solanum tuberosum]
SMEL4.1_10g016470.1	[K]	Transcription	Molecular Function: DNA binding (GO:0003677);; Molecular Function: DNA-directed 5'-3' RNA polymerase activity (GO:0003899);; Biological Process: transcription, DNA-templated (GO:0006351);	K10908|0.0e+00|sot:102578215|K10908 DNA-directed RNA polymerase, mitochondrial [EC:2.7.7.6] | (RefSeq) DNA-directed RNA polymerase 1, mitochondrial	[KL]	--	DNA-dependent RNA polymerase	DNA-directed RNA polymerase 1, mitochondrial OS=Nicotiana sylvestris OX=4096 GN=RPOT1 PE=2 SV=1	DNA-directed RNA polymerase OS=Solanum chacoense OX=4108 PE=3 SV=1	K	Transcription	PREDICTED: DNA-directed RNA polymerase 1, mitochondrial [Solanum tuberosum]
SMEL4.1_10g016480.1	--	--	Molecular Function: ubiquitin-protein transferase activity (GO:0004842);	K08332|8.3e-37|ccaj:109805896|K08332 vacuolar protein 8 | (RefSeq) U-box domain-containing protein 44-like	[S]	Function unknown	U-box domain	Putative U-box domain-containing protein 42 OS=Arabidopsis thaliana OX=3702 GN=PUB42 PE=3 SV=1	RING-type E3 ubiquitin transferase OS=Solanum lycopersicum OX=4081 GN=101256674 PE=4 SV=1	S	Function unknown	PREDICTED: putative U-box domain-containing protein 42 [Solanum tuberosum]
SMEL4.1_10g016490.1	--	--	Biological Process: oxidation-reduction process (GO:0055114);	K10878|8.0e-07|bdi:100839132|K10878 meiotic recombination protein SPO11 | (RefSeq) DNA topoisomerase 6 subunit A3	--	--	AhpC/TSA antioxidant enzyme	--	Uncharacterized protein OS=Solanum tuberosum OX=4113 GN=102598386 PE=4 SV=1	S	Function unknown	hypothetical protein EJD97_012877 [Solanum chilense]
SMEL4.1_10g016500.1	--	--	Molecular Function: zinc ion binding (GO:0008270);	K23541|2.4e-131|egu:105049642|K23541 Ca2+/H+ antiporter, TMEM165/GDT1 family | (RefSeq) pentatricopeptide repeat-containing protein At3g24000, mitochondrial-like	[R]	General function prediction only	PPR repeat	Putative pentatricopeptide repeat-containing protein At1g68930 OS=Arabidopsis thaliana OX=3702 GN=PCMP-H22 PE=3 SV=1	Pentatricopeptide repeat-containing protein OS=Solanum tuberosum OX=4113 PE=3 SV=1	S	Function unknown	PREDICTED: putative pentatricopeptide repeat-containing protein At1g68930 [Solanum tuberosum]
SMEL4.1_10g016510.1	--	--	Biological Process: regulation of transcription, DNA-templated (GO:0006355);; Molecular Function: protein dimerization activity (GO:0046983);	K18878|1.3e-30|cann:107866053|K18878 BHLH transcription factor Upa20 | (RefSeq) Upa20; transcription factor bHLH137-like	--	--	Helix-loop-helix DNA-binding domain	Transcription factor bHLH49 OS=Arabidopsis thaliana OX=3702 GN=BHLH49 PE=1 SV=1	Transcription factor bHLH49 OS=Solanum tuberosum OX=4113 GN=102605413 PE=4 SV=1	K	Transcription	PREDICTED: transcription factor bHLH49-like isoform X2 [Solanum tuberosum]
SMEL4.1_10g016520.1	--	--	Molecular Function: methyltransferase activity (GO:0008168);; Cellular Component: integral component of membrane (GO:0016021);; Biological Process: methylation (GO:0032259);; Biological Process: xylan biosynthetic process (GO:0045492);	K18801|1.8e-58|cpap:110818702|K18801 glucuronoxylan 4-O-methyltransferase [EC:2.1.1.112] | (RefSeq) glucuronoxylan 4-O-methyltransferase 3-like	--	--	Polysaccharide biosynthesis	Probable methyltransferase At1g27930 OS=Arabidopsis thaliana OX=3702 GN=At1g27930 PE=1 SV=1	Putative methyltransferase OS=Nicotiana attenuata OX=49451 GN=A4A49_28761 PE=4 SV=1	S	Function unknown	hypothetical protein EJD97_022719 [Solanum chilense]
SMEL4.1_10g016530.1	--	--	Cellular Component: integral component of membrane (GO:0016021);	--	--	--	--	WPP domain-interacting tail-anchored protein 2 OS=Arabidopsis thaliana OX=3702 GN=WIT2 PE=1 SV=1	WPP domain-interacting tail-anchored protein 2 OS=Solanum tuberosum OX=4113 GN=102604853 PE=4 SV=1	S	Function unknown	hypothetical protein CQW23_16663 [Capsicum baccatum]
SMEL4.1_10g016540.1	--	--	--	--	--	--	--	--	uncharacterized protein LOC104227342 OS=Nicotiana sylvestris OX=4096 GN=LOC104227342 PE=4 SV=1	S	Function unknown	PREDICTED: uncharacterized protein LOC104227342 [Nicotiana sylvestris]
SMEL4.1_10g016550.1	--	--	Molecular Function: DNA-binding transcription factor activity (GO:0003700);	K09060|3.2e-06|gmx:778122|K09060 plant G-box-binding factor | (RefSeq) BZIP86; putative bZIP domain class transcription factor	--	--	bZIP transcription factor	Basic leucine zipper 43 OS=Arabidopsis thaliana OX=3702 GN=BZIP43 PE=1 SV=1	Ocs element-binding factor OS=Solanum tuberosum OX=4113 GN=102603725 PE=4 SV=1	K	Transcription	basic leucine zipper 43-like [Solanum pennellii]
SMEL4.1_10g016560.1	[O]	Posttranslational modification, protein turnover, chaperones	Molecular Function: ATP binding (GO:0005524);; Biological Process: protein refolding (GO:0042026);	K04077|2.8e-311|sot:102597087|K04077 chaperonin GroEL | (RefSeq) chaperonin 60 subunit beta 4, chloroplastic	[O]	Posttranslational modification, protein turnover, chaperones	TCP-1/cpn60 chaperonin family	Chaperonin 60 subunit beta 4, chloroplastic OS=Arabidopsis thaliana OX=3702 GN=CPN60B4 PE=1 SV=1	chaperonin 60 subunit beta 4, chloroplastic isoform X2 OS=Capsicum annuum OX=4072 GN=LOC107852751 PE=3 SV=1	O	Posttranslational modification, protein turnover, chaperones	PREDICTED: chaperonin 60 subunit beta 4, chloroplastic isoform X2 [Solanum tuberosum]
SMEL4.1_10g016570.1	[J]	Translation, ribosomal structure and biogenesis	Molecular Function: N-acetyltransferase activity (GO:0008080);	K22450|3.2e-91|nta:107819409|K22450 aralkylamine N-acetyltransferase [EC:2.3.1.87] | (RefSeq) uncharacterized N-acetyltransferase ycf52-like	--	--	Acetyltransferase (GNAT) family	Serotonin N-acetyltransferase 2, chloroplastic OS=Oryza sativa subsp. japonica OX=39947 GN=SNAT2 PE=1 SV=1	uncharacterized N-acetyltransferase ycf52-like OS=Nicotiana tabacum OX=4097 GN=LOC107819409 PE=4 SV=1	S	Function unknown	serotonin N-acetyltransferase 2, chloroplastic [Nicotiana tomentosiformis]
SMEL4.1_10g016580.1	[G]	Carbohydrate transport and metabolism	Molecular Function: phosphogluconate dehydrogenase (decarboxylating) activity (GO:0004616);; Biological Process: pentose-phosphate shunt (GO:0006098);; Biological Process: D-gluconate metabolic process (GO:0019521);; Molecular Function: NADP binding (GO:0050661);	K00033|4.2e-273|nau:109219470|K00033 6-phosphogluconate dehydrogenase [EC:1.1.1.44 1.1.1.343] | (RefSeq) 6-phosphogluconate dehydrogenase, decarboxylating 3	[G]	Carbohydrate transport and metabolism	6-phosphogluconate dehydrogenase, C-terminal domain	6-phosphogluconate dehydrogenase, decarboxylating 2 OS=Arabidopsis thaliana OX=3702 GN=PGD2 PE=1 SV=1	6-phosphogluconate dehydrogenase, decarboxylating OS=Nicotiana attenuata OX=49451 GN=A4A49_39523 PE=3 SV=1	G	Carbohydrate transport and metabolism	PREDICTED: 6-phosphogluconate dehydrogenase, decarboxylating 3 [Nicotiana attenuata]
SMEL4.1_10g016590.1	--	--	--	--	--	--	--	--	Uncharacterized protein OS=Solanum tuberosum OX=4113 GN=102598059 PE=4 SV=1	--	--	PREDICTED: uncharacterized protein LOC102598059 [Solanum tuberosum]
SMEL4.1_10g016600.1	--	--	Cellular Component: integral component of membrane (GO:0016021);	K04710|9.0e-16|gsl:Gasu_30160|K04710 ceramide synthetase [EC:2.3.1.24] | (RefSeq) longevity assurance protein LAG1	[U]	Intracellular trafficking, secretion, and vesicular transport	TLC domain	ASC1-like protein OS=Solanum lycopersicum OX=4081 PE=2 SV=1	TLC domain-containing protein OS=Solanum lycopersicum OX=4081 GN=543781 PE=4 SV=1	U	Intracellular trafficking, secretion, and vesicular transport	ASC1-like protein [Solanum lycopersicum]
SMEL4.1_10g016610.1	--	--	--	K00430|2.1e-48|vra:106755305|K00430 peroxidase [EC:1.11.1.7] | (RefSeq) peroxidase 11 isoform X2	--	--	--	--	Putative trigger factor-like OS=Solanum chacoense OX=4108 PE=4 SV=1	--	--	uncharacterized protein LOC107020390 [Solanum pennellii]
SMEL4.1_10g016620.1	[K]	Transcription	Molecular Function: DNA binding (GO:0003677);; Molecular Function: DNA-directed 5'-3' RNA polymerase activity (GO:0003899);; Biological Process: transcription, DNA-templated (GO:0006351);; Molecular Function: protein dimerization activity (GO:0046983);	K03011|1.7e-171|sly:101248675|K03011 DNA-directed RNA polymerase II subunit RPB3 | (RefSeq) DNA-directed RNA polymerases II, IV and V subunit 3	[K]	Transcription	RNA polymerase Rpb3/RpoA insert domain	DNA-directed RNA polymerases II, IV and V subunit 3 OS=Arabidopsis thaliana OX=3702 GN=NRPB3 PE=1 SV=1	Putative DNA-directed RNA polymerases II, IV and V subunit 3-like OS=Solanum chacoense OX=4108 PE=3 SV=1	K	Transcription	hypothetical protein EJD97_020549 [Solanum chilense]
SMEL4.1_10g016630.1	--	--	Molecular Function: intramolecular lyase activity (GO:0016872);	K01859|3.2e-106|sot:102599379|K01859 chalcone isomerase [EC:5.5.1.6] | (RefSeq) chalcone--flavonone isomerase B-like	--	--	Chalcone-flavanone isomerase	Chalcone--flavonone isomerase OS=Nicotiana tabacum OX=4097 GN=CHI PE=2 SV=1	Chalcone-flavonone isomerase family protein OS=Solanum melongena OX=4111 GN=CHI PE=2 SV=1	S	Function unknown	chalcone isomerase [Solanum melongena]
SMEL4.1_10g016640.1	--	--	Molecular Function: peroxidase activity (GO:0004601);; Cellular Component: extracellular region (GO:0005576);; Biological Process: response to oxidative stress (GO:0006979);; Molecular Function: heme binding (GO:0020037);; Biological Process: hydrogen peroxide catabolic process (GO:0042744);; Molecular Function: metal ion binding (GO:0046872);	K00430|1.9e-156|spen:107019941|K00430 peroxidase [EC:1.11.1.7] | (RefSeq) peroxidase 11	--	--	Peroxidase	Peroxidase 11 OS=Arabidopsis thaliana OX=3702 GN=PER11 PE=1 SV=1	Peroxidase OS=Solanum lycopersicum OX=4081 PE=3 SV=1	Q	Secondary metabolites biosynthesis, transport and catabolism	peroxidase 11 [Solanum pennellii]
SMEL4.1_10g016650.1	[F]	Nucleotide transport and metabolism	Molecular Function: ATP binding (GO:0005524);; Molecular Function: kinase activity (GO:0016301);	K00876|6.9e-272|nau:109210494|K00876 uridine kinase [EC:2.7.1.48] | (RefSeq) uridine-cytidine kinase C-like isoform X1	[TZ]	--	Phosphoribulokinase / Uridine kinase family	Inorganic pyrophosphatase TTM2 OS=Arabidopsis thaliana OX=3702 GN=TTM2 PE=1 SV=1	Uridine cytidine kinase I OS=Solanum tuberosum OX=4113 GN=102600036 PE=4 SV=1	--	--	PREDICTED: uridine-cytidine kinase C-like isoform X1 [Nicotiana attenuata]
SMEL4.1_10g016660.1	--	--	Molecular Function: protein binding (GO:0005515);	--	--	--	F-box domain	F-box/FBD/LRR-repeat protein At1g13570 OS=Arabidopsis thaliana OX=3702 GN=At1g13570 PE=2 SV=1	Ubiquitin-protein ligase OS=Solanum tuberosum OX=4113 PE=4 SV=1	S	Function unknown	PREDICTED: F-box/FBD/LRR-repeat protein At1g13570-like [Solanum tuberosum]
SMEL4.1_10g016670.1	--	--	--	K08065|4.8e-14|nsy:104235531|K08065 nuclear transcription Y subunit beta | (RefSeq) uncharacterized protein LOC104235531	--	--	--	--	Uncharacterized protein OS=Solanum lycopersicum OX=4081 PE=4 SV=1	--	--	uncharacterized protein LOC114076783 [Solanum pennellii]
SMEL4.1_10g016680.1	--	--	Molecular Function: protein binding (GO:0005515);	--	--	--	F-box domain	F-box/FBD/LRR-repeat protein At1g13570 OS=Arabidopsis thaliana OX=3702 GN=At1g13570 PE=2 SV=1	F-box/FBD/LRR-repeat protein At1g13570-like OS=Nicotiana sylvestris OX=4096 GN=LOC104221211 PE=4 SV=1	S	Function unknown	PREDICTED: F-box/FBD/LRR-repeat protein At1g13570-like [Solanum tuberosum]
SMEL4.1_10g016690.1	--	--	Molecular Function: protein binding (GO:0005515);	K01322|8.9e-14|csat:104767606|K01322 prolyl oligopeptidase [EC:3.4.21.26] | (RefSeq) putative F-box/LRR-repeat protein At3g18150	--	--	F-box domain	F-box/FBD/LRR-repeat protein At1g13570 OS=Arabidopsis thaliana OX=3702 GN=At1g13570 PE=2 SV=1	F-box/FBD/LRR-repeat protein At1g13570-like isoform X1 OS=Nicotiana sylvestris OX=4096 GN=LOC104211616 PE=4 SV=1	--	--	PREDICTED: F-box/FBD/LRR-repeat protein At1g13570-like [Solanum tuberosum]
SMEL4.1_10g016700.1	[M]	Cell wall/membrane/envelope biogenesis	Molecular Function: protein serine/threonine kinase activity (GO:0004674);; Molecular Function: ATP binding (GO:0005524);; Cellular Component: integral component of membrane (GO:0016021);	K13418|6.9e-153|ppp:112278174|K13418 somatic embryogenesis receptor kinase 1 [EC:2.7.10.1 2.7.11.1] | (RefSeq) LRR receptor kinase BAK1-like	--	--	Protein kinase domain	Protein NSP-INTERACTING KINASE 1 OS=Arabidopsis thaliana OX=3702 GN=NIK1 PE=1 SV=1	Leucine-rich repeat receptor-like kinase OS=Solanum tuberosum OX=4113 GN=102601043 PE=3 SV=1	T	Signal transduction mechanisms	PREDICTED: protein NSP-INTERACTING KINASE 1-like [Solanum tuberosum]
SMEL4.1_10g016710.1	--	--	Molecular Function: adenosylmethionine decarboxylase activity (GO:0004014);; Biological Process: spermine biosynthetic process (GO:0006597);; Biological Process: spermidine biosynthetic process (GO:0008295);	K01611|1.7e-208|cann:107847415|K01611 S-adenosylmethionine decarboxylase [EC:4.1.1.50] | (RefSeq) S-adenosylmethionine decarboxylase proenzyme	[T]	Signal transduction mechanisms	Adenosylmethionine decarboxylase	S-adenosylmethionine decarboxylase proenzyme OS=Datura stramonium OX=4076 GN=SAMDC PE=2 SV=1	S-adenosylmethionine decarboxylase alpha chain OS=Capsicum annuum OX=4072 GN=LOC107847415 PE=3 SV=1	H	Coenzyme transport and metabolism	PREDICTED: S-adenosylmethionine decarboxylase proenzyme [Capsicum annuum]
SMEL4.1_10g016720.1	--	--	Biological Process: phospholipid biosynthetic process (GO:0008654);; Cellular Component: integral component of membrane (GO:0016021);; Molecular Function: phosphotransferase activity, for other substituted phosphate groups (GO:0016780);	K00993|3.1e-156|nau:109212839|K00993 ethanolaminephosphotransferase [EC:2.7.8.1] | (RefSeq) choline/ethanolaminephosphotransferase 1	[I]	Lipid transport and metabolism	CDP-alcohol phosphatidyltransferase	Choline/ethanolaminephosphotransferase 1 OS=Arabidopsis thaliana OX=3702 GN=AAPT1 PE=1 SV=1	choline/ethanolaminephosphotransferase 1 OS=Nicotiana sylvestris OX=4096 GN=LOC104239414 PE=3 SV=1	I	Lipid transport and metabolism	PREDICTED: choline/ethanolaminephosphotransferase 1 [Nicotiana sylvestris]
SMEL4.1_10g016740.1	--	--	Molecular Function: zinc ion binding (GO:0008270);; Cellular Component: integral component of membrane (GO:0016021);	K16282|2.5e-59|nau:109236206|K16282 E3 ubiquitin-protein ligase RHA2 [EC:2.3.2.27] | (RefSeq) E3 ubiquitin-protein ligase RHA2B-like	[O]	Posttranslational modification, protein turnover, chaperones	Ring finger domain	Probable E3 ubiquitin-protein ligase XERICO OS=Arabidopsis thaliana OX=3702 GN=XERICO PE=1 SV=1	E3 ubiquitin-protein ligase RHA2A OS=Capsicum chinense OX=80379 GN=BC332_27396 PE=4 SV=1	O	Posttranslational modification, protein turnover, chaperones	E3 ubiquitin-protein ligase RHA2A [Capsicum annuum]
SMEL4.1_10g016750.1	--	--	Molecular Function: zinc ion binding (GO:0008270);	K16282|1.2e-47|nsy:104245272|K16282 E3 ubiquitin-protein ligase RHA2 [EC:2.3.2.27] | (RefSeq) E3 ubiquitin-protein ligase Os06g0535400-like	[O]	Posttranslational modification, protein turnover, chaperones	Ring finger domain	E3 ubiquitin-protein ligase RHA2B OS=Arabidopsis thaliana OX=3702 GN=RHA2B PE=1 SV=2	E3 ubiquitin-protein ligase OS=Nicotiana attenuata OX=49451 GN=A4A49_11725 PE=4 SV=1	O	Posttranslational modification, protein turnover, chaperones	hypothetical protein EJD97_001613, partial [Solanum chilense]
SMEL4.1_10g016760.1	--	--	Molecular Function: zinc ion binding (GO:0008270);; Cellular Component: integral component of membrane (GO:0016021);	K16282|8.1e-38|nsy:104245272|K16282 E3 ubiquitin-protein ligase RHA2 [EC:2.3.2.27] | (RefSeq) E3 ubiquitin-protein ligase Os06g0535400-like	[O]	Posttranslational modification, protein turnover, chaperones	Ring finger domain	E3 ubiquitin-protein ligase RHA2A OS=Arabidopsis thaliana OX=3702 GN=RHA2A PE=1 SV=1	Uncharacterized protein OS=Vitis vinifera OX=29760 GN=VITISV_039591 PE=4 SV=1	O	Posttranslational modification, protein turnover, chaperones	hypothetical protein EJD97_001613, partial [Solanum chilense]
SMEL4.1_10g016770.1	--	--	Biological Process: generation of catalytic spliceosome for second transesterification step (GO:0000350);	K12870|1.4e-71|adu:107471354|K12870 pre-mRNA-splicing factor ISY1 | (RefSeq) pre-mRNA-splicing factor ISY1 homolog	[A]	RNA processing and modification	Isy1-like splicing family	--	Pre-mRNA-splicing factor ISY1-like protein OS=Capsicum chinense OX=80379 GN=BC332_13689 PE=3 SV=1	A	RNA processing and modification	Pre-mRNA-splicing factor ISY1 -like protein [Capsicum chinense]
SMEL4.1_10g016780.1	--	--	Biological Process: defense response (GO:0006952);; Molecular Function: ADP binding (GO:0043531);	K13453|0.0e+00|sot:102596100|K13453 disease resistance protein | (RefSeq) putative late blight resistance protein homolog R1B-23	[T]	Signal transduction mechanisms	NB-ARC domain	Putative late blight resistance protein homolog R1B-16 OS=Solanum demissum OX=50514 GN=R1B-16 PE=3 SV=1	PRF OS=Solanum tuberosum OX=4113 GN=102596100 PE=3 SV=1	T	Signal transduction mechanisms	PREDICTED: putative late blight resistance protein homolog R1B-23 [Solanum tuberosum]
SMEL4.1_10g016790.1	[Q]	Secondary metabolites biosynthesis, transport and catabolism	Molecular Function: oxidoreductase activity (GO:0016491);	K09835|1.6e-58|boe:106307135|K09835 prolycopene isomerase [EC:5.2.1.13] | (RefSeq) prolycopene isomerase, chloroplastic	[H]	Coenzyme transport and metabolism	Flavin containing amine oxidoreductase	Prolycopene isomerase, chloroplastic OS=Daucus carota OX=4039 GN=CRTISO PE=2 SV=1	Amino_oxidase domain-containing protein OS=Solanum lycopersicum OX=4081 GN=101247017 PE=4 SV=1	H	Coenzyme transport and metabolism	prolycopene isomerase, chloroplastic [Solanum lycopersicum]
SMEL4.1_10g016800.1	--	--	--	--	--	--	--	--	Prolamin_like domain-containing protein OS=Capsicum baccatum OX=33114 GN=CQW23_25209 PE=4 SV=1	S	Function unknown	putative F-box protein-like [Capsicum annuum]
SMEL4.1_10g016810.1	--	--	--	--	--	--	--	--	Putative ovule protein (Fragment) OS=Solanum chacoense OX=4108 PE=4 SV=1	--	--	--
SMEL4.1_10g016820.1	--	--	Molecular Function: molecular_function (GO:0003674);; Molecular Function: nucleic acid binding (GO:0003676);; Molecular Function: RNA binding (GO:0003723);; Molecular Function: catalytic activity (GO:0003824);; Molecular Function: nuclease activity (GO:0004518);; Molecular Function: endonuclease activity (GO:0004519);; Molecular Function: binding (GO:0005488);; Cellular Component: cellular_compon…	K22262|5.2e-44|qsu:112034235|K22262 WD repeat and FYVE domain-containing protein 3 | (RefSeq) protein SPIRRIG	[R]	General function prediction only	PPR repeat family	Pentatricopeptide repeat-containing protein At1g18485 OS=Arabidopsis thaliana OX=3702 GN=PCMP-H8 PE=2 SV=2	Pentatricopeptide repeat-containing protein OS=Solanum tuberosum OX=4113 GN=102588552 PE=4 SV=1	S	Function unknown	PREDICTED: pentatricopeptide repeat-containing protein At1g18485-like [Solanum tuberosum]
SMEL4.1_10g016830.1	[P]	Inorganic ion transport and metabolism	Molecular Function: copper ion binding (GO:0005507);; Molecular Function: ATP binding (GO:0005524);; Cellular Component: integral component of membrane (GO:0016021);; Molecular Function: ATPase-coupled cation transmembrane transporter activity (GO:0019829);; Biological Process: metal ion transport (GO:0030001);	K17686|9.1e-61|cann:107854865|K17686 P-type Cu+ transporter [EC:7.2.2.8] | (RefSeq) probable copper-transporting ATPase HMA5	[P]	Inorganic ion transport and metabolism	E1-E2 ATPase	Copper-transporting ATPase HMA4 OS=Oryza sativa subsp. japonica OX=39947 GN=HMA4 PE=1 SV=1	Putative copper-transporting ATPase HMA5 OS=Capsicum chinense OX=80379 GN=BC332_28304 PE=3 SV=1	P	Inorganic ion transport and metabolism	putative copper-transporting ATPase HMA5 [Capsicum chinense]
SMEL4.1_10g016840.1	--	--	--	--	--	--	--	--	Putative ovule protein (Fragment) OS=Solanum chacoense OX=4108 PE=4 SV=1	--	--	--
SMEL4.1_10g016850.1	--	--	--	--	--	--	Prolamin-like	--	Putative egg cell-secreted protein 1.2-like OS=Solanum chacoense OX=4108 PE=4 SV=1	S	Function unknown	PREDICTED: uncharacterized protein LOC102593480 [Solanum tuberosum]
SMEL4.1_10g016860.1	--	--	--	--	--	--	--	--	Putative ovule protein (Fragment) OS=Solanum chacoense OX=4108 PE=4 SV=1	--	--	--
SMEL4.1_10g016870.1	--	--	--	--	--	--	Prolamin-like	--	Putative egg cell-secreted protein 1.2-like OS=Solanum chacoense OX=4108 PE=4 SV=1	S	Function unknown	PREDICTED: uncharacterized protein LOC102593480 [Solanum tuberosum]
SMEL4.1_10g016880.1	--	--	Molecular Function: protein binding (GO:0005515);	--	--	--	F-box domain	F-box protein DOR OS=Arabidopsis thaliana OX=3702 GN=DOR PE=1 SV=2	Ubiquitin-protein ligase OS=Solanum tuberosum OX=4113 GN=102603880 PE=4 SV=1	S	Function unknown	PREDICTED: F-box protein At3g07870-like [Solanum tuberosum]
SMEL4.1_10g016890.1	--	--	Cellular Component: nucleolus (GO:0005730);; Biological Process: rRNA processing (GO:0006364);	K14549|2.9e-280|sly:101251776|K14549 U3 small nucleolar RNA-associated protein 15 | (RefSeq) protein SLOW WALKER 1	[S]	Function unknown	UTP15 C terminal	Protein SLOW WALKER 1 OS=Arabidopsis thaliana OX=3702 GN=SWA1 PE=2 SV=1	WD_REPEATS_REGION domain-containing protein OS=Solanum lycopersicum OX=4081 PE=4 SV=1	S	Function unknown	protein SLOW WALKER 1 [Solanum lycopersicum]
SMEL4.1_10g016900.1	--	--	--	K00993|4.0e-77|bna:106453259|K00993 ethanolaminephosphotransferase [EC:2.7.8.1] | (RefSeq) uncharacterized protein LOC106453259	--	--	Protein of unknown function (DUF1262)	--	Uncharacterized protein OS=Solanum tuberosum OX=4113 GN=102603055 PE=4 SV=1	S	Function unknown	PREDICTED: uncharacterized protein LOC102603055 [Solanum tuberosum]
SMEL4.1_10g016910.1	--	--	--	--	--	--	--	--	Uncharacterized protein OS=Solanum tuberosum OX=4113 PE=4 SV=1	--	--	uncharacterized protein LOC107019801 [Solanum pennellii]
SMEL4.1_10g016920.1	--	--	Cellular Component: integral component of membrane (GO:0016021);	--	--	--	--	--	Putative ovule protein (Fragment) OS=Solanum chacoense OX=4108 PE=4 SV=1	S	Function unknown	PREDICTED: uncharacterized protein LOC102602378 [Solanum tuberosum]
SMEL4.1_10g016930.1	--	--	Biological Process: phospholipid biosynthetic process (GO:0008654);; Cellular Component: integral component of membrane (GO:0016021);; Molecular Function: phosphotransferase activity, for other substituted phosphate groups (GO:0016780);	K00993|1.6e-17|nau:109212839|K00993 ethanolaminephosphotransferase [EC:2.7.8.1] | (RefSeq) choline/ethanolaminephosphotransferase 1	[I]	Lipid transport and metabolism	--	Choline/ethanolaminephosphotransferase 1 OS=Arabidopsis thaliana OX=3702 GN=AAPT1 PE=1 SV=1	Putative choline/ethanolaminephosphotransferase 1-like OS=Solanum chacoense OX=4108 PE=3 SV=1	I	Lipid transport and metabolism	choline/ethanolaminephosphotransferase 1 [Solanum pennellii]
SMEL4.1_10g016940.1	--	--	Cellular Component: nucleus (GO:0005634);; Biological Process: intracellular protein transport (GO:0006886);; Molecular Function: Ran GTPase binding (GO:0008536);	K20224|0.0e+00|sot:102594878|K20224 importin-9 | (RefSeq) importin-9	[UY]	--	Importin-beta N-terminal domain	--	Importin N-terminal domain-containing protein OS=Solanum lycopersicum OX=4081 PE=4 SV=1	--	--	PREDICTED: importin-9 isoform X1 [Solanum tuberosum]
SMEL4.1_10g016950.1	--	--	Molecular Function: protein binding (GO:0005515);	--	--	--	F-box domain	Putative F-box/LRR-repeat/kelch-repeat protein At1g11620 OS=Arabidopsis thaliana OX=3702 GN=At1g11620 PE=4 SV=1	F-box protein OS=Nicotiana attenuata OX=49451 GN=A4A49_35813 PE=4 SV=1	S	Function unknown	PREDICTED: F-box protein At3g07870-like [Nicotiana attenuata]
SMEL4.1_10g016960.1	[FR]	--	Molecular Function: 5'-deoxynucleotidase activity (GO:0002953);	K07023|3.4e-91|spen:107018743|K07023 putative hydrolases of HD superfamily | (RefSeq) HD domain-containing protein 2	[R]	General function prediction only	HD domain	--	5'-deoxynucleotidase OS=Solanum chacoense OX=4108 PE=3 SV=1	S	Function unknown	HD domain-containing protein 2 [Solanum pennellii]
SMEL4.1_10g016970.1	--	--	Molecular Function: protein kinase activity (GO:0004672);; Molecular Function: ATP binding (GO:0005524);; Cellular Component: integral component of membrane (GO:0016021);	K01180|1.4e-152|cmax:111487562|K01180 endo-1,3(4)-beta-glucanase [EC:3.2.1.6] | (RefSeq) uncharacterized protein LOC111487562	[T]	Signal transduction mechanisms	Protein kinase domain	Proline-rich receptor-like protein kinase PERK9 OS=Arabidopsis thaliana OX=3702 GN=PERK9 PE=1 SV=1	Protein kinase domain-containing protein OS=Solanum lycopersicum OX=4081 GN=101246136 PE=4 SV=1	T	Signal transduction mechanisms	proline-rich receptor-like protein kinase PERK9 [Solanum lycopersicum]
SMEL4.1_10g016990.1	--	--	Cellular Component: integral component of membrane (GO:0016021);	--	--	--	--	--	Uncharacterized protein OS=Solanum lycopersicum OX=4081 GN=104647301 PE=4 SV=1	--	--	PREDICTED: uncharacterized protein LOC102591794 [Solanum tuberosum]
SMEL4.1_10g017000.1	[P]	Inorganic ion transport and metabolism	Molecular Function: magnesium ion binding (GO:0000287);; Molecular Function: ATP binding (GO:0005524);; Biological Process: phospholipid transport (GO:0015914);; Cellular Component: integral component of membrane (GO:0016021);; Molecular Function: hydrolase activity (GO:0016787);; Molecular Function: ATPase-coupled intramembrane lipid transporter activity (GO:0140326);	K01530|0.0e+00|sot:102593677|K01530 phospholipid-translocating ATPase [EC:7.6.2.1] | (RefSeq) putative phospholipid-transporting ATPase 9	[R]	General function prediction only	Phospholipid-translocating P-type ATPase C-terminal	Putative phospholipid-transporting ATPase 9 OS=Arabidopsis thaliana OX=3702 GN=ALA9 PE=3 SV=1	Phospholipid-transporting ATPase OS=Solanum chacoense OX=4108 PE=3 SV=1	P	Inorganic ion transport and metabolism	PREDICTED: putative phospholipid-transporting ATPase 9 [Solanum tuberosum]
SMEL4.1_10g017010.1	[J]	Translation, ribosomal structure and biogenesis	Biological Process: tRNA wobble adenosine to inosine editing (GO:0002100);; Molecular Function: tRNA-specific adenosine deaminase activity (GO:0008251);	K11991|0.0e+00|sot:102593353|K11991 tRNA(adenine34) deaminase [EC:3.5.4.33] | (RefSeq) tRNA(adenine(34)) deaminase, chloroplastic	[F]	Nucleotide transport and metabolism	MafB19-like deaminase	tRNA(adenine(34)) deaminase, chloroplastic OS=Arabidopsis thaliana OX=3702 GN=TADA PE=1 SV=1	tRNA(adenine(34)) deaminase OS=Solanum tuberosum OX=4113 PE=3 SV=1	F	Nucleotide transport and metabolism	PREDICTED: tRNA(adenine(34)) deaminase, chloroplastic [Solanum tuberosum]
SMEL4.1_10g017020.1	--	--	Cellular Component: cellular_component (GO:0005575);; Cellular Component: membrane (GO:0016020);; Cellular Component: intrinsic component of membrane (GO:0031224);; Cellular Component: anchored component of membrane (GO:0031225);; Cellular Component: obsolete membrane part (GO:0044425);	--	--	--	--	--	Uncharacterized protein OS=Solanum lycopersicum OX=4081 PE=4 SV=1	S	Function unknown	lysine-rich arabinogalactan protein 19 [Solanum pennellii]
SMEL4.1_10g017030.1	--	--	Molecular Function: zinc ion binding (GO:0008270);	K17808|1.2e-39|sot:102593015|K17808 mitochondrial protein import protein ZIM17 | (RefSeq) uncharacterized protein C24H6.02c	--	--	--	--	Putative ovule protein OS=Solanum chacoense OX=4108 PE=4 SV=1	S	Function unknown	PREDICTED: uncharacterized protein LOC102593015 isoform X2 [Solanum tuberosum]
SMEL4.1_10g017040.1	--	--	Cellular Component: integral component of membrane (GO:0016021);	K24195|0.0e+00|spen:107019115|K24195 xenotropic and polytropic retrovirus receptor 1 | (RefSeq) phosphate transporter PHO1 homolog 1	[U]	Intracellular trafficking, secretion, and vesicular transport	EXS family	Phosphate transporter PHO1 homolog 1 OS=Arabidopsis thaliana OX=3702 GN=PHO1-H1 PE=2 SV=1	Phosphate transporter PHO1-3 OS=Capsicum chinense OX=80379 GN=BC332_27376 PE=3 SV=1	U	Intracellular trafficking, secretion, and vesicular transport	phosphate transporter PHO1 homolog 1 [Solanum pennellii]
SMEL4.1_10g017050.1	[I]	Lipid transport and metabolism	Cellular Component: integral component of membrane (GO:0016021);; Molecular Function: hydrolase activity (GO:0016787);	K15889|1.1e-219|sly:101244664|K15889 prenylcysteine alpha-carboxyl methylesterase [EC:3.1.1.-] | (RefSeq) probable isoprenylcysteine alpha-carbonyl methylesterase ICMEL1	[R]	General function prediction only	alpha/beta hydrolase fold	Probable isoprenylcysteine alpha-carbonyl methylesterase ICMEL1 OS=Arabidopsis thaliana OX=3702 GN=ICMEL1 PE=2 SV=1	Abhydrolase_3 domain-containing protein OS=Solanum lycopersicum OX=4081 GN=101244664 PE=4 SV=1	I	Lipid transport and metabolism	probable isoprenylcysteine alpha-carbonyl methylesterase ICMEL1 [Solanum lycopersicum]
SMEL4.1_10g017060.1	--	--	--	--	--	--	--	--	WAS protein family homolog DDB_G0292878-like isoform X1 OS=Capsicum annuum OX=4072 GN=LOC107848548 PE=4 SV=1	--	--	PREDICTED: uncharacterized protein LOC107060856 [Solanum tuberosum]
SMEL4.1_10g017070.1	--	--	Biological Process: lipid transport (GO:0006869);; Molecular Function: lipid binding (GO:0008289);	--	--	--	Protease inhibitor/seed storage/LTP family	Non-specific lipid-transfer protein 2 OS=Solanum lycopersicum OX=4081 GN=LE16 PE=2 SV=1	Non-specific lipid-transfer protein OS=Solanum tuberosum OX=4113 GN=102598583 PE=3 SV=1	C	Energy production and conversion	PREDICTED: non-specific lipid-transfer protein 2-like [Solanum tuberosum]
SMEL4.1_10g017080.1	--	--	Biological Process: lipid transport (GO:0006869);; Molecular Function: lipid binding (GO:0008289);	--	--	--	Protease inhibitor/seed storage/LTP family	Non-specific lipid-transfer protein 2 OS=Solanum lycopersicum OX=4081 GN=LE16 PE=2 SV=1	Non-specific lipid-transfer protein OS=Capsicum annuum OX=4072 GN=LOC107845933 PE=3 SV=1	C	Energy production and conversion	PREDICTED: non-specific lipid-transfer protein 2-like [Capsicum annuum]
SMEL4.1_10g017090.1	--	--	Biological Process: lipid transport (GO:0006869);; Molecular Function: lipid binding (GO:0008289);	--	--	--	Protease inhibitor/seed storage/LTP family	Non-specific lipid-transfer protein 2 OS=Solanum lycopersicum OX=4081 GN=LE16 PE=2 SV=1	Non-specific lipid-transfer protein OS=Capsicum annuum OX=4072 GN=LOC107845933 PE=3 SV=1	C	Energy production and conversion	PREDICTED: non-specific lipid-transfer protein 2-like [Capsicum annuum]
SMEL4.1_10g017100.1	--	--	Biological Process: lipid transport (GO:0006869);; Molecular Function: lipid binding (GO:0008289);	--	--	--	Protease inhibitor/seed storage/LTP family	Non-specific lipid-transfer protein 2 OS=Solanum lycopersicum OX=4081 GN=LE16 PE=2 SV=1	Non-specific lipid-transfer protein OS=Solanum tuberosum OX=4113 PE=2 SV=1	C	Energy production and conversion	non-specific lipid transfer protein a7 precursor [Solanum tuberosum]
SMEL4.1_10g017110.1	--	--	Biological Process: lipid transport (GO:0006869);; Molecular Function: lipid binding (GO:0008289);	--	--	--	Protease inhibitor/seed storage/LTP family	Non-specific lipid-transfer protein 2 OS=Solanum lycopersicum OX=4081 GN=LE16 PE=2 SV=1	Non-specific lipid-transfer protein OS=Solanum tuberosum OX=4113 PE=2 SV=1	C	Energy production and conversion	non-specific lipid transfer protein a7 precursor [Solanum tuberosum]
SMEL4.1_10g017120.1	--	--	Biological Process: lipid transport (GO:0006869);; Molecular Function: lipid binding (GO:0008289);	--	--	--	Protease inhibitor/seed storage/LTP family	Non-specific lipid-transfer protein 2 OS=Solanum lycopersicum OX=4081 GN=LE16 PE=2 SV=1	Non-specific lipid-transfer protein OS=Capsicum annuum OX=4072 GN=LOC107845933 PE=3 SV=1	C	Energy production and conversion	PREDICTED: non-specific lipid-transfer protein 2-like [Capsicum annuum]
SMEL4.1_10g017130.1	--	--	Biological Process: lipid transport (GO:0006869);; Molecular Function: lipid binding (GO:0008289);	--	--	--	Protease inhibitor/seed storage/LTP family	Non-specific lipid-transfer protein 2 OS=Solanum lycopersicum OX=4081 GN=LE16 PE=2 SV=1	Non-specific lipid-transfer protein OS=Solanum tuberosum OX=4113 PE=2 SV=1	C	Energy production and conversion	non-specific lipid transfer protein a7 precursor [Solanum tuberosum]
SMEL4.1_10g017140.1	--	--	Biological Process: lipid transport (GO:0006869);; Molecular Function: lipid binding (GO:0008289);	--	--	--	Protease inhibitor/seed storage/LTP family	Non-specific lipid-transfer protein 2 OS=Nicotiana tabacum OX=4097 PE=3 SV=1	Non-specific lipid-transfer protein OS=Nicotiana attenuata OX=49451 GN=NLTP2_9 PE=3 SV=1	C	Energy production and conversion	PREDICTED: non-specific lipid-transfer protein 2-like [Nicotiana attenuata]
SMEL4.1_10g017150.1	--	--	Biological Process: lipid transport (GO:0006869);; Molecular Function: lipid binding (GO:0008289);	--	--	--	Protease inhibitor/seed storage/LTP family	Non-specific lipid-transfer protein 2 OS=Solanum lycopersicum OX=4081 GN=LE16 PE=2 SV=1	Non-specific lipid-transfer protein OS=Solanum tuberosum OX=4113 GN=102598583 PE=3 SV=1	C	Energy production and conversion	PREDICTED: non-specific lipid-transfer protein 2-like [Solanum tuberosum]
SMEL4.1_10g017160.1	--	--	--	--	--	--	--	--	Uncharacterized protein ycf68 OS=Capsicum annuum OX=4072 GN=T459_27840 PE=3 SV=1	--	--	hypothetical protein T459_27840 [Capsicum annuum]
SMEL4.1_10g017170.1	--	--	Molecular Function: protein kinase activity (GO:0004672);; Molecular Function: ATP binding (GO:0005524);	K00924|4.3e-24|lsv:111911418|K00924 kinase [EC:2.7.1.-] | (RefSeq) probable serine/threonine-protein kinase PBL19	[T]	Signal transduction mechanisms	Protein tyrosine and serine/threonine kinase	Probable serine/threonine-protein kinase PIX7 OS=Arabidopsis thaliana OX=3702 GN=PIX7 PE=1 SV=1	probable serine/threonine-protein kinase NAK isoform X1 OS=Capsicum annuum OX=4072 GN=LOC107845943 PE=4 SV=1	T	Signal transduction mechanisms	probable serine/threonine-protein kinase PBL18 [Solanum lycopersicum]
SMEL4.1_10g017180.1	--	--	Molecular Function: DNA binding (GO:0003677);; Cellular Component: nucleus (GO:0005634);; Molecular Function: zinc ion binding (GO:0008270);	K09287|4.9e-12|ats:109750367|K09287 RAV-like factor | (RefSeq) LOC109750367; AP2/ERF and B3 domain-containing protein Os01g0141000-like	--	--	B3 DNA binding domain	B3 domain-containing protein Os07g0679700 OS=Oryza sativa subsp. japonica OX=39947 GN=Os07g0679700 PE=2 SV=1	Uncharacterized protein OS=Capsicum annuum OX=4072 GN=T459_25592 PE=4 SV=1	K	Transcription	PREDICTED: B3 domain-containing transcription repressor VAL2 isoform X1 [Solanum tuberosum]
SMEL4.1_10g017190.1	[J]	Translation, ribosomal structure and biogenesis	Molecular Function: translation elongation factor activity (GO:0003746);; Cellular Component: cytoplasm (GO:0005737);	K02356|8.4e-116|sot:102594735|K02356 elongation factor P | (RefSeq) elongation factor P	--	--	Elongation factor P (EF-P) OB domain	--	Elongation factor P OS=Capsicum baccatum OX=33114 GN=CQW23_23985 PE=3 SV=1	J	Translation, ribosomal structure and biogenesis	PREDICTED: elongation factor P [Solanum tuberosum]
SMEL4.1_10g017200.1	--	--	Molecular Function: protein binding (GO:0005515);	--	--	--	F-box domain	--	F-box protein OS=Solanum tuberosum OX=4113 PE=4 SV=1	S	Function unknown	F-box/kelch-repeat protein At3g23880-like [Solanum pennellii]
SMEL4.1_10g017210.1	--	--	Biological Process: rRNA processing (GO:0006364);	K07447|1.1e-31|spen:107002206|K07447 putative holliday junction resolvase [EC:3.1.-.-] | (RefSeq) uncharacterized protein LOC107002206 isoform X1	--	--	Holliday junction resolvase	--	GRF domain class transcription factor OS=Solanum tuberosum OX=4113 GN=102597279 PE=4 SV=1	L	Replication, recombination and repair	uncharacterized protein LOC107002206 isoform X3 [Solanum pennellii]
SMEL4.1_10g017230.1	--	--	Molecular Function: calcium ion binding (GO:0005509);; Cellular Component: integral component of membrane (GO:0016021);	K01859|5.0e-305|sita:101771169|K01859 chalcone isomerase [EC:5.5.1.6] | (RefSeq) vacuolar-sorting receptor 1	--	--	PA domain	Vacuolar-sorting receptor 1 OS=Arabidopsis thaliana OX=3702 GN=VSR1 PE=1 SV=2	Vacuolar sorting receptor protein PV72 OS=Solanum tuberosum OX=4113 GN=102594404 PE=3 SV=1	T	Signal transduction mechanisms	PREDICTED: vacuolar-sorting receptor 1-like isoform X1 [Solanum tuberosum]
SMEL4.1_10g017240.1	--	--	Cellular Component: integral component of membrane (GO:0016021);	--	[S]	Function unknown	Lung seven transmembrane receptor	--	Lung seven transmembrane receptor family protein OS=Solanum tuberosum OX=4113 GN=102594067 PE=4 SV=1	S	Function unknown	transmembrane protein 87B-like [Solanum pennellii]
SMEL4.1_10g017250.1	[S]	Function unknown	Cellular Component: integral component of membrane (GO:0016021);	--	--	--	Protein of unknown function, DUF599	--	Uncharacterized protein OS=Solanum tuberosum OX=4113 GN=102593750 PE=4 SV=1	S	Function unknown	PREDICTED: uncharacterized protein LOC102593750 [Solanum tuberosum]
SMEL4.1_10g017260.1	[G]	Carbohydrate transport and metabolism	Molecular Function: channel activity (GO:0015267);; Cellular Component: integral component of membrane (GO:0016021);	K09873|3.0e-86|nau:109218553|K09873 aquaporin TIP | (RefSeq) aquaporin TIP1-3-like	[G]	Carbohydrate transport and metabolism	Major intrinsic protein	Aquaporin TIP1-3 OS=Arabidopsis thaliana OX=3702 GN=TIP1-3 PE=1 SV=1	Aquaporin TIP1-2 OS=Capsicum baccatum OX=33114 GN=CQW23_00630 PE=3 SV=1	P	Inorganic ion transport and metabolism	Aquaporin TIP1-2 [Capsicum baccatum]
SMEL4.1_10g017270.1	--	--	Cellular Component: extracellular region (GO:0005576);; Biological Process: rejection of self pollen (GO:0060320);	--	--	--	Plant self-incompatibility protein S1	--	S-protein homolog OS=Nicotiana attenuata OX=49451 GN=A4A49_37546 PE=3 SV=1	S	Function unknown	hypothetical protein A4A49_37546 [Nicotiana attenuata]
SMEL4.1_10g017280.1	--	--	Molecular Function: DNA-binding transcription factor activity (GO:0003700);; Cellular Component: nucleus (GO:0005634);; Molecular Function: sequence-specific DNA binding (GO:0043565);	K13459|5.9e-15|cqi:110711488|K13459 disease resistance protein RPS2 | (RefSeq) disease resistance protein At4g27190-like isoform X1	--	--	WRKY DNA -binding domain	Probable WRKY transcription factor 46 OS=Arabidopsis thaliana OX=3702 GN=WRKY46 PE=1 SV=1	WRKY domain-containing protein OS=Capsicum annuum OX=4072 GN=T459_25223 PE=4 SV=1	K	Transcription	PREDICTED: probable WRKY transcription factor 70 [Solanum tuberosum]
SMEL4.1_10g017290.1	[P]	Inorganic ion transport and metabolism	Molecular Function: magnesium ion binding (GO:0000287);; Molecular Function: ATP binding (GO:0005524);; Biological Process: phospholipid transport (GO:0015914);; Cellular Component: integral component of membrane (GO:0016021);; Molecular Function: ATPase-coupled intramembrane lipid transporter activity (GO:0140326);	K14802|0.0e+00|sot:102592076|K14802 phospholipid-transporting ATPase [EC:7.6.2.1] | (RefSeq) phospholipid-transporting ATPase 1-like	[R]	General function prediction only	Phospholipid-translocating P-type ATPase C-terminal	Phospholipid-transporting ATPase 1 OS=Arabidopsis thaliana OX=3702 GN=ALA1 PE=2 SV=1	Phospholipid-transporting ATPase OS=Solanum lycopersicum OX=4081 GN=101260883 PE=3 SV=1	P	Inorganic ion transport and metabolism	PREDICTED: phospholipid-transporting ATPase 1-like [Solanum tuberosum]
SMEL4.1_10g017300.1	--	--	--	--	--	--	--	--	uncharacterized protein LOC104212508 OS=Nicotiana sylvestris OX=4096 GN=LOC104212508 PE=4 SV=1	S	Function unknown	PREDICTED: uncharacterized protein LOC104212508 [Nicotiana sylvestris]
SMEL4.1_10g017310.1	[T]	Signal transduction mechanisms	Molecular Function: protein serine/threonine kinase activity (GO:0004674);; Molecular Function: ATP binding (GO:0005524);	K04688|1.8e-265|sot:102591740|K04688 ribosomal protein S6 kinase beta [EC:2.7.11.1] | (RefSeq) serine/threonine-protein kinase AtPK2/AtPK19	[RT]	--	Protein kinase domain	Serine/threonine-protein kinase AtPK2/AtPK19 OS=Arabidopsis thaliana OX=3702 GN=ATPK2 PE=1 SV=2	Ribosomal protein S6 kinase OS=Solanum tuberosum OX=4113 GN=102591740 PE=3 SV=1	T	Signal transduction mechanisms	PREDICTED: serine/threonine-protein kinase AtPK2/AtPK19 [Solanum tuberosum]
SMEL4.1_10g017320.1	[G]	Carbohydrate transport and metabolism	Molecular Function: hydrolase activity, hydrolyzing O-glycosyl compounds (GO:0004553);; Biological Process: carbohydrate metabolic process (GO:0005975);	K19355|8.2e-252|cann:107845858|K19355 mannan endo-1,4-beta-mannosidase [EC:3.2.1.78] | (RefSeq) mannan endo-1,4-beta-mannosidase 6	--	--	Cellulase (glycosyl hydrolase family 5)	Mannan endo-1,4-beta-mannosidase 6 OS=Arabidopsis thaliana OX=3702 GN=MAN6 PE=2 SV=1	Mannan endo-1,4-beta-mannosidase OS=Capsicum baccatum OX=33114 GN=CQW23_23799 PE=3 SV=1	G	Carbohydrate transport and metabolism	Mannan endo-1,4-beta-mannosidase 6 [Capsicum baccatum]
SMEL4.1_10g017330.1	--	--	--	K22450|3.6e-07|smo:SELMODRAFT_126619|K22450 aralkylamine N-acetyltransferase [EC:2.3.1.87] | (RefSeq) hypothetical protein	--	--	--	Serotonin N-acetyltransferase 1, chloroplastic OS=Oryza sativa subsp. indica OX=39946 GN=SNAT1 PE=3 SV=3	Uncharacterized protein OS=Populus trichocarpa OX=3694 GN=POPTR_T146300 PE=4 SV=1	--	--	serotonin N-acetyltransferase 1, chloroplastic isoform X2 [Solanum pennellii]
SMEL4.1_10g017340.1	--	--	Cellular Component: photosystem II (GO:0009523);; Cellular Component: chloroplast thylakoid membrane (GO:0009535);; Biological Process: photosynthetic electron transport in photosystem II (GO:0009772);; Cellular Component: integral component of membrane (GO:0016021);; Molecular Function: chlorophyll binding (GO:0016168);; Biological Process: protein-chromophore linkage (GO:0018298);; Molecular Fu…	K02705|7.3e-118|cam:6797478|K02705 photosystem II CP43 chlorophyll apoprotein | (RefSeq) psbC, CiarC_p015; photosystem II 44 kDa protein	--	--	Photosystem II protein	Photosystem II CP43 reaction center protein OS=Atropa belladonna OX=33113 GN=psbC PE=3 SV=1	Photosystem II CP43 reaction center protein OS=Salix koriyanagi OX=2511006 GN=psbC PE=3 SV=1	C	Energy production and conversion	photosystem II CP43 chlorophyll apoprotein [Pedicularis oederi]
SMEL4.1_10g017350.1	--	--	Cellular Component: chloroplast (GO:0009507);; Cellular Component: photosystem II (GO:0009523);; Biological Process: photosynthetic electron transport in photosystem II (GO:0009772);; Cellular Component: integral component of membrane (GO:0016021);; Molecular Function: chlorophyll binding (GO:0016168);; Biological Process: protein-chromophore linkage (GO:0018298);; Cellular Component: thylakoid m…	K02705|8.2e-31|han:110896250|K02705 photosystem II CP43 chlorophyll apoprotein | (RefSeq) uncharacterized protein LOC110896250	--	--	Photosystem II protein	Photosystem II CP43 reaction center protein OS=Atropa belladonna OX=33113 GN=psbC PE=3 SV=1	Photosystem II CP43 reaction center protein OS=Fraxinus chiisanensis OX=490838 GN=psbC PE=3 SV=1	C	Energy production and conversion	photosystem II 44 kDa protein [Cubanola domingensis]
SMEL4.1_10g017360.1	--	--	Cellular Component: chloroplast (GO:0009507);; Cellular Component: photosystem II (GO:0009523);; Biological Process: photosynthetic electron transport in photosystem II (GO:0009772);; Cellular Component: integral component of membrane (GO:0016021);; Molecular Function: chlorophyll binding (GO:0016168);; Biological Process: protein-chromophore linkage (GO:0018298);; Cellular Component: thylakoid m…	K02705|2.8e-232|cann:13540205|K02705 photosystem II CP43 chlorophyll apoprotein | (RefSeq) psbC, C329_p072; photosystem II CP43 chlorophyll apoprotein	--	--	Photosystem II protein	Photosystem II CP43 reaction center protein OS=Solanum tuberosum OX=4113 GN=psbC PE=3 SV=1	Photosystem II CP43 reaction center protein OS=Solanum melongena OX=4111 GN=psbC PE=3 SV=1	C	Energy production and conversion	photosystem II CP43 chlorophyll apoprotein [Dunalia obovata]
SMEL4.1_10g017370.1	[J]	Translation, ribosomal structure and biogenesis	Molecular Function: N-acetyltransferase activity (GO:0008080);	K22450|6.5e-22|cann:107845856|K22450 aralkylamine N-acetyltransferase [EC:2.3.1.87] | (RefSeq) acetyltransferase NSI	--	--	--	Histone acetyltransferase TAP1 OS=Glycine max OX=3847 GN=TAP1 PE=1 SV=1	Putative acetyltransferase NSI OS=Capsicum baccatum OX=33114 GN=CQW23_23852 PE=4 SV=1	S	Function unknown	serotonin N-acetyltransferase 1, chloroplastic [Solanum lycopersicum]
SMEL4.1_10g017380.1	[O]	Posttranslational modification, protein turnover, chaperones	Molecular Function: protein serine/threonine kinase activity (GO:0004674);; Molecular Function: ATP binding (GO:0005524);; Cellular Component: integral component of membrane (GO:0016021);	K16224|1.7e-61|boe:106304564|K16224 senescence-induced receptor-like serine/threonine-protein kinase | (RefSeq) senescence-induced receptor-like serine/threonine-protein kinase	--	--	Protein tyrosine and serine/threonine kinase	Probable LRR receptor-like serine/threonine-protein kinase At5g37450 OS=Arabidopsis thaliana OX=3702 GN=At5g37450 PE=1 SV=1	Putative LRR receptor-like serine/threonine-protein kinase OS=Capsicum chinense OX=80379 GN=BC332_25684 PE=3 SV=1	T	Signal transduction mechanisms	PREDICTED: probable LRR receptor-like serine/threonine-protein kinase At1g06840 [Solanum tuberosum]
SMEL4.1_10g017390.1	[T]	Signal transduction mechanisms	Molecular Function: protein serine/threonine kinase activity (GO:0004674);; Molecular Function: ATP binding (GO:0005524);; Cellular Component: integral component of membrane (GO:0016021);	K13430|3.3e-61|dct:110101514|K13430 serine/threonine-protein kinase PBS1 [EC:2.7.11.1] | (RefSeq) serine/threonine-protein kinase PBS1	--	--	Protein kinase domain	Probable LRR receptor-like serine/threonine-protein kinase At1g06840 OS=Arabidopsis thaliana OX=3702 GN=At1g06840 PE=1 SV=2	Putative LRR receptor-like serine/threonine-protein kinase OS=Capsicum baccatum OX=33114 GN=CQW23_23850 PE=3 SV=1	T	Signal transduction mechanisms	PREDICTED: probable LRR receptor-like serine/threonine-protein kinase At1g06840 [Solanum tuberosum]
SMEL4.1_10g017400.1	--	--	Cellular Component: integral component of membrane (GO:0016021);	--	--	--	Protein RETICULATA-related	Protein RETICULATA-RELATED 3, chloroplastic OS=Arabidopsis thaliana OX=3702 GN=RER3 PE=1 SV=1	Alphavirus core protein family OS=Solanum tuberosum OX=4113 GN=107057868 PE=3 SV=1	S	Function unknown	PREDICTED: protein RETICULATA-RELATED 3, chloroplastic-like [Solanum tuberosum]
SMEL4.1_10g017410.1	--	--	--	--	--	--	Domain of unknown function (DUF4283)	--	uncharacterized protein LOC104228608 OS=Nicotiana sylvestris OX=4096 GN=LOC104228608 PE=4 SV=1	E	Amino acid transport and metabolism	PREDICTED: uncharacterized protein LOC104228608 [Nicotiana sylvestris]
SMEL4.1_10g017420.1	--	--	Molecular Function: DNA binding (GO:0003677);; Molecular Function: protein dimerization activity (GO:0046983);	K22390|6.6e-06|sly:101268464|K22390 acid phosphatase type 7 | (RefSeq) probable inactive purple acid phosphatase 27	--	--	--	--	BED-type domain-containing protein OS=Solanum lycopersicum OX=4081 PE=4 SV=1	E	Amino acid transport and metabolism	PREDICTED: zinc finger BED domain-containing protein RICESLEEPER 2-like [Nicotiana sylvestris]
SMEL4.1_10g017430.1	--	--	Molecular Function: RNA binding (GO:0003723);	K14945|8.2e-157|sot:102590377|K14945 protein quaking | (RefSeq) KH domain-containing protein At3g08620	[A]	RNA processing and modification	Homodimerisation region of STAR domain protein	KH domain-containing protein At2g38610 OS=Arabidopsis thaliana OX=3702 GN=At2g38610 PE=1 SV=1	Putative KH domain-containing protein-like OS=Solanum chacoense OX=4108 PE=4 SV=1	A	RNA processing and modification	PREDICTED: KH domain-containing protein At3g08620 [Solanum tuberosum]
SMEL4.1_10g017440.1	--	--	Cellular Component: integral component of membrane (GO:0016021);	K03945|1.3e-31|sly:101259686|K03945 NADH dehydrogenase (ubiquinone) 1 alpha subcomplex subunit 1 | (RefSeq) NADH dehydrogenase [ubiquinone] 1 alpha subcomplex subunit 1	--	--	NADH-ubiquinone oxidoreductase MWFE subunit	NADH dehydrogenase [ubiquinone] 1 alpha subcomplex subunit 1 OS=Arabidopsis thaliana OX=3702 GN=At3g08610 PE=3 SV=1	NADH dehydrogenase [ubiquinone] 1 alpha subcomplex subunit 1 OS=Solanum tuberosum OX=4113 GN=102590063 PE=3 SV=1	S	Function unknown	NADH dehydrogenase [ubiquinone] 1 alpha subcomplex subunit 1 [Solanum lycopersicum]
SMEL4.1_10g017450.1	--	--	Molecular Function: cysteine-type peptidase activity (GO:0008234);	--	--	--	--	--	Ulp1 protease family, C-terminal catalytic domain containing protein OS=Solanum demissum OX=50514 GN=SDM1_53t00021 PE=3 SV=2	S	Function unknown	Ulp1 protease family, C-terminal catalytic domain containing protein [Solanum demissum]
SMEL4.1_10g017460.1	--	--	--	--	--	--	--	--	Uncharacterized protein OS=Nicotiana attenuata OX=49451 GN=A4A49_18263 PE=4 SV=1	--	--	hypothetical protein EJD97_025500 [Solanum chilense]
SMEL4.1_10g017470.1	--	--	Cellular Component: integral component of membrane (GO:0016021);	--	--	--	Protein of unknown function (DUF1191)	--	Putative plant/F17O14-7 protein-like OS=Solanum chacoense OX=4108 PE=4 SV=1	S	Function unknown	PREDICTED: uncharacterized protein LOC107057869 [Solanum tuberosum]
SMEL4.1_10g017480.1	--	--	Cellular Component: integral component of membrane (GO:0016021);	K22379|6.7e-248|spen:107002574|K22379 E3 ubiquitin-protein ligase RNFT1 [EC:2.3.2.27] | (RefSeq) E3 ubiquitin-protein ligase RNFT1	[S]	Function unknown	Zinc finger, C3HC4 type (RING finger)	--	RING-type domain-containing protein OS=Solanum tuberosum OX=4113 GN=102589407 PE=4 SV=1	O	Posttranslational modification, protein turnover, chaperones	PREDICTED: RING finger and transmembrane domain-containing protein 2 [Solanum tuberosum]
SMEL4.1_10g017490.1	--	--	Molecular Function: kinase activity (GO:0016301);	--	--	--	--	--	Putative serine/threonine-protein kinase dst2-like OS=Solanum chacoense OX=4108 PE=4 SV=1	--	--	uncharacterized protein LOC107002575 [Solanum pennellii]
SMEL4.1_10g017500.1	--	--	Cellular Component: integral component of membrane (GO:0016021);; Biological Process: transmembrane transport (GO:0055085);	K24139|3.8e-222|sly:101257817|K24139 auxin efflux carrier family protein | (RefSeq) protein PIN-LIKES 6	[S]	Function unknown	Membrane transport protein	Protein PIN-LIKES 6 OS=Arabidopsis thaliana OX=3702 GN=PILS6 PE=2 SV=1	Uncharacterized protein OS=Solanum lycopersicum OX=4081 GN=101257817 PE=4 SV=1	S	Function unknown	protein PIN-LIKES 6 [Solanum lycopersicum]
SMEL4.1_10g017510.1	--	--	Molecular Function: ATP binding (GO:0005524);; Cellular Component: chloroplast (GO:0009507);; Biological Process: photosynthetic electron transport in photosystem II (GO:0009772);; Cellular Component: integral component of membrane (GO:0016021);; Molecular Function: electron transporter, transferring electrons within the cyclic electron transport pathway of photosynthesis activity (GO:0045156);	K02703|1.5e-189|aly:32283147|K02703 photosystem II P680 reaction center D1 protein [EC:1.10.3.9] | (RefSeq) psbA, B9N47_pgp099; photosystem II protein D1	--	--	Plant protein of unknown function (DUF825)	Protein Ycf2 OS=Nicotiana sylvestris OX=4096 GN=ycf2-A PE=3 SV=1	32 kDa thylakoid membrane protein OS=Capsicum annuum OX=4072 GN=T459_02518 PE=3 SV=1	C	Energy production and conversion	hypothetical protein T459_02518 [Capsicum annuum]
SMEL4.1_10g017520.1	[J]	Translation, ribosomal structure and biogenesis	Molecular Function: RNA binding (GO:0003723);; Molecular Function: structural constituent of ribosome (GO:0003735);; Biological Process: translation (GO:0006412);; Cellular Component: plastid (GO:0009536);; Cellular Component: large ribosomal subunit (GO:0015934);; Molecular Function: transferase activity (GO:0016740);	K02886|4.5e-138|sly:3950470|K02886 large subunit ribosomal protein L2 | (RefSeq) rpl2, LyesC2p028; ribosomal protein L2	[J]	Translation, ribosomal structure and biogenesis	Ribosomal Proteins L2, C-terminal domain	50S ribosomal protein L2-A, chloroplastic OS=Atropa belladonna OX=33113 GN=rpl2-A PE=3 SV=1	Ribosomal protein L2 OS=Solanum melongena OX=4111 GN=rpl2 PE=3 SV=1	J	Translation, ribosomal structure and biogenesis	ribosomal protein L2 [Solanum melongena]
SMEL4.1_10g017530.1	--	--	--	--	--	--	--	--	uncharacterized protein LOC107844760 isoform X1 OS=Capsicum annuum OX=4072 GN=LOC107844760 PE=4 SV=1	--	--	uncharacterized protein LOC101257120 [Solanum lycopersicum]
SMEL4.1_10g017540.1	--	--	Molecular Function: calcium ion binding (GO:0005509);	K13448|6.7e-92|cann:107845825|K13448 calcium-binding protein CML | (RefSeq) calcium-binding protein CAST-like	[T]	Signal transduction mechanisms	EF hand	Calcium-binding protein CAST OS=Solanum tuberosum OX=4113 PE=2 SV=1	Uncharacterized protein OS=Solanum lycopersicum OX=4081 GN=101256817 PE=4 SV=1	T	Signal transduction mechanisms	hypothetical protein EJD97_014976 [Solanum chilense]
SMEL4.1_10g017550.1	--	--	Cellular Component: integral component of membrane (GO:0016021);	--	--	--	Late embryogenesis abundant protein	--	Harpin-induced 1 OS=Solanum tuberosum OX=4113 PE=4 SV=1	S	Function unknown	hypothetical protein CQW23_23863 [Capsicum baccatum]
SMEL4.1_10g017560.1	--	--	Molecular Function: protein serine/threonine kinase activity (GO:0004674);; Molecular Function: ATP binding (GO:0005524);; Biological Process: cell division (GO:0051301);	K07760|1.5e-119|sot:102586889|K07760 cyclin-dependent kinase [EC:2.7.11.22] | (RefSeq) cell division control protein 2 homolog C	[R]	General function prediction only	Protein kinase domain	Cell division control protein 2 homolog C OS=Antirrhinum majus OX=4151 GN=CDC2C PE=2 SV=1	Putative cell division control protein 2-like OS=Solanum chacoense OX=4108 PE=3 SV=1	T	Signal transduction mechanisms	PREDICTED: cell division control protein 2 homolog C [Solanum tuberosum]
SMEL4.1_10g017570.1	[T]	Signal transduction mechanisms	Molecular Function: protein serine/threonine kinase activity (GO:0004674);; Molecular Function: ATP binding (GO:0005524);; Cellular Component: plasma membrane (GO:0005886);	K00924|4.3e-105|boe:106307512|K00924 kinase [EC:2.7.1.-] | (RefSeq) probable receptor-like protein kinase At3g55450 isoform X1	[T]	Signal transduction mechanisms	Protein tyrosine and serine/threonine kinase	Probable serine/threonine-protein kinase PBL8 OS=Arabidopsis thaliana OX=3702 GN=PBL8 PE=1 SV=1	serine/threonine-protein kinase At5g01020 OS=Capsicum annuum OX=4072 GN=LOC107845414 PE=3 SV=1	T	Signal transduction mechanisms	PREDICTED: serine/threonine-protein kinase At5g01020 [Capsicum annuum]
SMEL4.1_10g017580.1	[M]	Cell wall/membrane/envelope biogenesis	Biological Process: biosynthetic process (GO:0009058);; Cellular Component: integral component of membrane (GO:0016021);; Molecular Function: nucleotidyltransferase activity (GO:0016779);	K00967|3.0e-213|sot:102586221|K00967 ethanolamine-phosphate cytidylyltransferase [EC:2.7.7.14] | (RefSeq) ethanolamine-phosphate cytidylyltransferase	[I]	Lipid transport and metabolism	Cytidylyltransferase-like	Ethanolamine-phosphate cytidylyltransferase OS=Arabidopsis thaliana OX=3702 GN=PECT1 PE=1 SV=1	Ethanolamine-phosphate cytidylyltransferase OS=Capsicum baccatum OX=33114 GN=CQW23_23943 PE=3 SV=1	I	Lipid transport and metabolism	PREDICTED: ethanolamine-phosphate cytidylyltransferase [Solanum tuberosum]
SMEL4.1_10g017590.1	--	--	Molecular Function: zinc ion binding (GO:0008270);	K17086|4.7e-18|fve:101300290|K17086 transmembrane 9 superfamily member 2/4 | (RefSeq) uncharacterized LOC101300290	--	--	MULE transposase domain	--	SWIM-type domain-containing protein (Fragment) OS=Nicotiana attenuata OX=49451 GN=A4A49_65237 PE=4 SV=1	--	--	hypothetical protein A4A49_65237, partial [Nicotiana attenuata]
SMEL4.1_10g017600.1	--	--	--	--	--	--	--	--	GOLD domain-containing protein OS=Capsicum baccatum OX=33114 GN=CQW23_23948 PE=4 SV=1	--	--	putative ethanolamine-phosphate cytidylyltransferase-like [Capsicum annuum]
SMEL4.1_10g017610.1	--	--	--	--	--	--	--	--	GOLD domain-containing protein OS=Solanum lycopersicum OX=4081 GN=101255446 PE=4 SV=1	--	--	uncharacterized protein LOC101255446 [Solanum lycopersicum]
SMEL4.1_10g017620.1	--	--	Biological Process: cell fate specification (GO:0001708);; Biological Process: regionalization (GO:0003002);; Molecular Function: molecular_function (GO:0003674);; Molecular Function: nucleic acid binding (GO:0003676);; Molecular Function: DNA binding (GO:0003677);; Molecular Function: DNA-binding transcription factor activity (GO:0003700);; Molecular Function: binding (GO:0005488);; Cellular Com…	K14494|5.9e-62|pop:7475521|K14494 DELLA protein | (RefSeq) DELLA protein GAIP	--	--	GRAS domain family	Protein SCARECROW OS=Ipomoea nil OX=35883 GN=SCR PE=1 SV=1	GRAS domain-containing protein OS=Solanum lycopersicum OX=4081 GN=101255150 PE=3 SV=1	K	Transcription	protein SCARECROW [Solanum pennellii]
SMEL4.1_10g017630.1	--	--	Biological Process: lipid transport (GO:0006869);; Molecular Function: lipid binding (GO:0008289);	--	--	--	Protease inhibitor/seed storage/LTP family	Non-specific lipid-transfer protein 1 OS=Solanum lycopersicum OX=4081 GN=TSW12 PE=2 SV=1	Non-specific lipid-transfer protein OS=Solanum tuberosum OX=4113 GN=102597952 PE=3 SV=1	C	Energy production and conversion	PREDICTED: non-specific lipid-transfer protein 1 [Solanum tuberosum]
SMEL4.1_10g017640.1	--	--	Molecular Function: peroxidase activity (GO:0004601);; Cellular Component: extracellular region (GO:0005576);; Biological Process: response to oxidative stress (GO:0006979);; Molecular Function: heme binding (GO:0020037);; Biological Process: hydrogen peroxide catabolic process (GO:0042744);; Molecular Function: metal ion binding (GO:0046872);	K00430|7.1e-165|spen:107032566|K00430 peroxidase [EC:1.11.1.7] | (RefSeq) peroxidase 2-like	--	--	Peroxidase	Peroxidase 2 OS=Oryza sativa subsp. japonica OX=39947 GN=PRX112 PE=2 SV=1	Peroxidase OS=Nicotiana sylvestris OX=4096 GN=LOC104225697 PE=3 SV=1	Q	Secondary metabolites biosynthesis, transport and catabolism	peroxidase 2-like [Solanum pennellii]
SMEL4.1_10g017650.1	--	--	Molecular Function: GTP binding (GO:0005525);; Molecular Function: metal ion binding (GO:0046872);	--	--	--	AIG1 family	Immune-associated nucleotide-binding protein 9 OS=Arabidopsis thaliana OX=3702 GN=IAN9 PE=2 SV=1	NTGP4 OS=Solanum tuberosum OX=4113 PE=4 SV=1	S	Function unknown	PREDICTED: protein AIG1-like [Solanum tuberosum]
SMEL4.1_10g017670.1	--	--	Molecular Function: DNA binding (GO:0003677);; Cellular Component: nucleus (GO:0005634);; Biological Process: negative regulation of transcription, DNA-templated (GO:0045892);	K01870|5.6e-10|smo:SELMODRAFT_437676|K01870 isoleucyl-tRNA synthetase [EC:6.1.1.5] | (RefSeq) hypothetical protein	--	--	Transcriptional repressor, ovate	Transcription repressor OFP2 OS=Arabidopsis thaliana OX=3702 GN=OFP2 PE=1 SV=1	Transcription repressor OS=Solanum chacoense OX=4108 PE=4 SV=1	S	Function unknown	Transcription repressor OFP1 [Capsicum baccatum]
SMEL4.1_10g017680.1	--	--	--	--	--	--	--	--	Uncharacterized protein OS=Capsicum annuum OX=4072 GN=T459_15108 PE=4 SV=1	--	--	hypothetical protein T459_15108 [Capsicum annuum]
SMEL4.1_10g017690.1	--	--	Molecular Function: transcription corepressor activity (GO:0003714);; Cellular Component: nucleus (GO:0005634);; Biological Process: regulation of transcription, DNA-templated (GO:0006355);	K11644|2.4e-59|cann:107860586|K11644 paired amphipathic helix protein Sin3a | (RefSeq) paired amphipathic helix protein Sin3-like 2	[B]	Chromatin structure and dynamics	Paired amphipathic helix repeat	Paired amphipathic helix protein Sin3-like 2 OS=Arabidopsis thaliana OX=3702 GN=SNL2 PE=1 SV=2	paired amphipathic helix protein Sin3-like 2 isoform X4 OS=Capsicum annuum OX=4072 GN=LOC107860584 PE=4 SV=1	B	Chromatin structure and dynamics	PREDICTED: paired amphipathic helix protein Sin3-like 2 isoform X4 [Capsicum annuum]
SMEL4.1_10g017700.1	[E]	Amino acid transport and metabolism	Molecular Function: L-aspartate:2-oxoglutarate aminotransferase activity (GO:0004069);; Biological Process: cellular amino acid metabolic process (GO:0006520);; Biological Process: biosynthetic process (GO:0009058);; Molecular Function: pyridoxal phosphate binding (GO:0030170);	K14455|6.9e-224|sot:102591539|K14455 aspartate aminotransferase, mitochondrial [EC:2.6.1.1] | (RefSeq) aspartate aminotransferase, mitochondrial-like	[E]	Amino acid transport and metabolism	Aminotransferase class I and II	Aspartate aminotransferase, mitochondrial OS=Arabidopsis thaliana OX=3702 GN=ASP1 PE=1 SV=1	Aspartate aminotransferase OS=Capsicum annuum OX=4072 GN=T459_25599 PE=3 SV=1	E	Amino acid transport and metabolism	PREDICTED: aspartate aminotransferase, mitochondrial-like isoform X1 [Solanum tuberosum]
SMEL4.1_10g017710.1	[C]	Energy production and conversion	Molecular Function: electron transfer activity (GO:0009055);; Cellular Component: chloroplast (GO:0009507);; Molecular Function: metal ion binding (GO:0046872);; Molecular Function: 2 iron, 2 sulfur cluster binding (GO:0051537);	K02639|6.6e-62|sot:102598947|K02639 ferredoxin | (RefSeq) ferredoxin-like	--	--	2Fe-2S iron-sulfur cluster binding domain	Ferredoxin-1, chloroplastic OS=Solanum lycopersicum OX=4081 GN=SEND33 PE=2 SV=1	Ferredoxin OS=Solanum tuberosum OX=4113 GN=102598947 PE=3 SV=1	C	Energy production and conversion	PREDICTED: ferredoxin-like [Solanum tuberosum]
SMEL4.1_10g017720.1	--	--	Biological Process: lipid transport (GO:0006869);; Molecular Function: lipid binding (GO:0008289);	--	--	--	Protease inhibitor/seed storage/LTP family	Non-specific lipid-transfer protein 2 OS=Nicotiana tabacum OX=4097 PE=3 SV=1	Non-specific lipid-transfer protein OS=Capsicum annuum OX=4072 GN=LTP1 PE=2 SV=1	C	Energy production and conversion	lipid transfer protein LTP1 precursor [Capsicum annuum]
SMEL4.1_10g017730.1	--	--	Molecular Function: DNA binding (GO:0003677);; Molecular Function: protein dimerization activity (GO:0046983);	K21437|2.0e-23|ccav:112523844|K21437 ankyrin repeat domain-containing protein 13 | (RefSeq) uncharacterized protein LOC112523844	[L]	Replication, recombination and repair	hAT family C-terminal dimerisation region	Putative AC transposase OS=Zea mays OX=4577 PE=2 SV=2	zinc finger BED domain-containing protein RICESLEEPER 1-like OS=Nicotiana sylvestris OX=4096 GN=LOC104213290 PE=4 SV=1	L	Replication, recombination and repair	PREDICTED: zinc finger BED domain-containing protein RICESLEEPER 1-like [Nicotiana sylvestris]
SMEL4.1_10g017740.1	--	--	Biological Process: lipid transport (GO:0006869);; Molecular Function: lipid binding (GO:0008289);	--	--	--	Protease inhibitor/seed storage/LTP family	Non-specific lipid-transfer protein 2 OS=Nicotiana tabacum OX=4097 PE=3 SV=1	Non-specific lipid-transfer protein OS=Capsicum annuum OX=4072 GN=LTP1 PE=2 SV=1	C	Energy production and conversion	lipid transfer protein LTP1 precursor [Capsicum annuum]
SMEL4.1_10g017750.1	--	--	Biological Process: lipid transport (GO:0006869);; Molecular Function: lipid binding (GO:0008289);	--	--	--	Protease inhibitor/seed storage/LTP family	Non-specific lipid-transfer protein 2 OS=Nicotiana tabacum OX=4097 PE=3 SV=1	Non-specific lipid-transfer protein OS=Solanum chacoense OX=4108 PE=3 SV=1	C	Energy production and conversion	PREDICTED: non-specific lipid-transfer protein 2-like [Capsicum annuum]
SMEL4.1_10g017760.1	--	--	Biological Process: lipid transport (GO:0006869);; Molecular Function: lipid binding (GO:0008289);	--	--	--	Protease inhibitor/seed storage/LTP family	Non-specific lipid-transfer protein 2 OS=Nicotiana tabacum OX=4097 PE=3 SV=1	Non-specific lipid-transfer protein OS=Solanum chacoense OX=4108 PE=3 SV=1	C	Energy production and conversion	PREDICTED: non-specific lipid-transfer protein 2-like [Capsicum annuum]
SMEL4.1_10g017770.1	--	--	Molecular Function: peroxidase activity (GO:0004601);; Cellular Component: extracellular region (GO:0005576);; Biological Process: response to oxidative stress (GO:0006979);; Molecular Function: heme binding (GO:0020037);; Biological Process: hydrogen peroxide catabolic process (GO:0042744);; Molecular Function: metal ion binding (GO:0046872);	K00430|1.6e-161|nta:107796839|K00430 peroxidase [EC:1.11.1.7] | (RefSeq) cationic peroxidase 1-like	--	--	Peroxidase	Peroxidase 4 OS=Vitis vinifera OX=29760 GN=GSVIVT00023967001 PE=1 SV=1	Peroxidase OS=Nicotiana tabacum OX=4097 GN=LOC107796839 PE=3 SV=1	Q	Secondary metabolites biosynthesis, transport and catabolism	PREDICTED: cationic peroxidase 1-like [Nicotiana tabacum]
SMEL4.1_10g017780.1	--	--	Molecular Function: peroxidase activity (GO:0004601);; Cellular Component: extracellular region (GO:0005576);; Biological Process: response to oxidative stress (GO:0006979);; Molecular Function: heme binding (GO:0020037);; Biological Process: hydrogen peroxide catabolic process (GO:0042744);; Molecular Function: metal ion binding (GO:0046872);	K00430|1.6e-37|sly:101246908|K00430 peroxidase [EC:1.11.1.7] | (RefSeq) peroxidase 70	--	--	Peroxidase	Cationic peroxidase 1 OS=Arachis hypogaea OX=3818 GN=PNC1 PE=1 SV=2	Peroxidase OS=Solanum lycopersicum OX=4081 PE=3 SV=1	Q	Secondary metabolites biosynthesis, transport and catabolism	peroxidase 70-like [Solanum pennellii]
SMEL4.1_10g017790.1	--	--	--	--	--	--	--	--	Zinc finger containing preotein OS=Solanum tuberosum OX=4113 PE=4 SV=1	S	Function unknown	PREDICTED: uncharacterized protein LOC107058170 [Solanum tuberosum]
SMEL4.1_10g017800.1	--	--	Molecular Function: protein disulfide isomerase activity (GO:0003756);; Biological Process: cell redox homeostasis (GO:0045454);	K09580|1.1e-239|sot:102598658|K09580 protein disulfide-isomerase A1 [EC:5.3.4.1] | (RefSeq) protein disulfide-isomerase-like	[O]	Posttranslational modification, protein turnover, chaperones	Thioredoxin	Protein disulfide-isomerase OS=Datisca glomerata OX=34297 GN=PDI PE=2 SV=1	Protein disulfide-isomerase OS=Solanum chacoense OX=4108 PE=3 SV=1	O	Posttranslational modification, protein turnover, chaperones	PREDICTED: protein disulfide-isomerase-like [Solanum tuberosum]
SMEL4.1_10g017810.1	--	--	Molecular Function: peroxidase activity (GO:0004601);; Cellular Component: extracellular region (GO:0005576);; Biological Process: response to oxidative stress (GO:0006979);; Molecular Function: heme binding (GO:0020037);; Biological Process: hydrogen peroxide catabolic process (GO:0042744);; Molecular Function: metal ion binding (GO:0046872);	K00430|3.4e-64|sly:101246908|K00430 peroxidase [EC:1.11.1.7] | (RefSeq) peroxidase 70	--	--	Peroxidase	Peroxidase 70 OS=Zea mays OX=4577 GN=PER70 PE=1 SV=1	Peroxidase OS=Solanum lycopersicum OX=4081 PE=3 SV=1	Q	Secondary metabolites biosynthesis, transport and catabolism	peroxidase 70 [Solanum lycopersicum]
SMEL4.1_10g017820.1	--	--	Molecular Function: peroxidase activity (GO:0004601);; Biological Process: response to oxidative stress (GO:0006979);; Molecular Function: heme binding (GO:0020037);; Molecular Function: metal ion binding (GO:0046872);	K00430|1.1e-41|sly:101246908|K00430 peroxidase [EC:1.11.1.7] | (RefSeq) peroxidase 70	--	--	Peroxidase	Peroxidase 9 OS=Arabidopsis thaliana OX=3702 GN=PER9 PE=1 SV=1	Peroxidase OS=Solanum tuberosum OX=4113 PE=3 SV=1	Q	Secondary metabolites biosynthesis, transport and catabolism	peroxidase 70-like [Solanum pennellii]
SMEL4.1_10g017830.1	--	--	Molecular Function: peroxidase activity (GO:0004601);; Cellular Component: extracellular region (GO:0005576);; Biological Process: response to oxidative stress (GO:0006979);; Molecular Function: heme binding (GO:0020037);; Biological Process: hydrogen peroxide catabolic process (GO:0042744);; Molecular Function: metal ion binding (GO:0046872);	K00430|1.0e-63|spen:107032506|K00430 peroxidase [EC:1.11.1.7] | (RefSeq) peroxidase 70-like	--	--	Peroxidase	Peroxidase 70 OS=Zea mays OX=4577 GN=PER70 PE=1 SV=1	Peroxidase OS=Solanum lycopersicum OX=4081 PE=3 SV=1	Q	Secondary metabolites biosynthesis, transport and catabolism	peroxidase 70-like [Solanum pennellii]
SMEL4.1_10g017840.1	[E]	Amino acid transport and metabolism	Molecular Function: transaminase activity (GO:0008483);; Molecular Function: pyridoxal phosphate binding (GO:0030170);	K00827|4.1e-259|sot:102589300|K00827 alanine-glyoxylate transaminase / (R)-3-amino-2-methylpropionate-pyruvate transaminase [EC:2.6.1.44 2.6.1.40] | (RefSeq) alanine--glyoxylate aminotransferase 2 homolog 2, mitochondrial	[E]	Amino acid transport and metabolism	Aminotransferase class-III	Alanine--glyoxylate aminotransferase 2 homolog 2, mitochondrial OS=Arabidopsis thaliana OX=3702 GN=AGT3 PE=1 SV=2	Alanine-glyoxylate aminotransferase OS=Solanum tuberosum OX=4113 GN=102589300 PE=3 SV=1	E	Amino acid transport and metabolism	PREDICTED: alanine--glyoxylate aminotransferase 2 homolog 2, mitochondrial [Solanum tuberosum]
SMEL4.1_10g017850.1	--	--	--	--	--	--	--	--	Putative ovule protein OS=Solanum chacoense OX=4108 PE=4 SV=1	--	--	--
SMEL4.1_10g017860.1	--	--	--	--	--	--	Domain of unknown function (DUF4283)	--	Resistance gene OS=Solanum tuberosum OX=4113 PE=4 SV=1	--	--	hypothetical protein EJD97_018727 [Solanum chilense]
SMEL4.1_10g017870.1	--	--	Molecular Function: protein serine/threonine kinase activity (GO:0004674);; Molecular Function: ATP binding (GO:0005524);; Biological Process: signal transduction (GO:0007165);	K16578|3.4e-36|nau:109222079|K16578 CLIP-associating protein 1/2 | (RefSeq) CLIP-associated protein-like	--	--	--	--	Cbl-interacting serinethreonine-protein kinase 9 (Fragment) OS=Nicotiana attenuata OX=49451 GN=CIPK9 PE=3 SV=1	E	Amino acid transport and metabolism	cbl-interacting serinethreonine-protein kinase 9, partial [Nicotiana attenuata]
SMEL4.1_10g017880.1	--	--	--	K16578|1.2e-17|nau:109222079|K16578 CLIP-associating protein 1/2 | (RefSeq) CLIP-associated protein-like	--	--	zinc-binding in reverse transcriptase	--	Putative ovule protein OS=Solanum chacoense OX=4108 PE=4 SV=1	--	--	hypothetical protein EJD97_016906, partial [Solanum chilense]
SMEL4.1_10g017890.1	--	--	Biological Process: TOR signaling (GO:0031929);; Cellular Component: TORC1 complex (GO:0031931);	K07204|5.7e-133|sot:107057742|K07204 regulatory associated protein of mTOR | (RefSeq) regulatory-associated protein of TOR 1-like	[D]	Cell cycle control, cell division, chromosome partitioning	--	Regulatory-associated protein of TOR 1 OS=Oryza sativa subsp. japonica OX=39947 GN=RAPTOR1 PE=2 SV=2	WD_REPEATS_REGION domain-containing protein OS=Solanum lycopersicum OX=4081 PE=3 SV=1	D	Cell cycle control, cell division, chromosome partitioning	PREDICTED: regulatory-associated protein of TOR 1-like isoform X4 [Solanum tuberosum]
SMEL4.1_10g017900.1	--	--	Cellular Component: cytoplasm (GO:0005737);; Biological Process: regulation of cell size (GO:0008361);; Biological Process: cellular response to starvation (GO:0009267);; Biological Process: regulation of autophagy (GO:0010506);; Biological Process: positive regulation of cell growth (GO:0030307);; Molecular Function: protein-macromolecule adaptor activity (GO:0030674);; Biological Process: TOR s…	K07204|5.3e-295|nta:107770804|K07204 regulatory associated protein of mTOR | (RefSeq) regulatory-associated protein of TOR 1-like	[D]	Cell cycle control, cell division, chromosome partitioning	HEAT repeat	Regulatory-associated protein of TOR 1 OS=Arabidopsis thaliana OX=3702 GN=RAPTOR1 PE=1 SV=1	regulatory-associated protein of TOR 1-like OS=Nicotiana tabacum OX=4097 GN=LOC107770804 PE=4 SV=1	D	Cell cycle control, cell division, chromosome partitioning	PREDICTED: regulatory-associated protein of TOR 1 isoform X2 [Nicotiana sylvestris]
SMEL4.1_10g017910.1	--	--	Cellular Component: cytoplasm (GO:0005737);; Biological Process: regulation of cell size (GO:0008361);; Biological Process: cellular response to starvation (GO:0009267);; Biological Process: regulation of autophagy (GO:0010506);; Biological Process: positive regulation of cell growth (GO:0030307);; Molecular Function: protein-macromolecule adaptor activity (GO:0030674);; Biological Process: TOR s…	K07204|2.6e-78|nto:104093721|K07204 regulatory associated protein of mTOR | (RefSeq) regulatory-associated protein of TOR 1-like	[D]	Cell cycle control, cell division, chromosome partitioning	WD domain, G-beta repeat	Regulatory-associated protein of TOR 1 OS=Arabidopsis thaliana OX=3702 GN=RAPTOR1 PE=1 SV=1	regulatory-associated protein of TOR 1-like OS=Nicotiana tabacum OX=4097 GN=LOC107824305 PE=3 SV=1	D	Cell cycle control, cell division, chromosome partitioning	PREDICTED: regulatory-associated protein of TOR 1-like, partial [Solanum tuberosum]
SMEL4.1_10g017920.1	--	--	Molecular Function: nucleic acid binding (GO:0003676);; Molecular Function: RNA-DNA hybrid ribonuclease activity (GO:0004523);	--	--	--	Reverse transcriptase-like	--	RNase H family protein OS=Solanum tuberosum OX=4113 PE=4 SV=1	S	Function unknown	PREDICTED: TMV resistance protein N-like [Solanum tuberosum]
SMEL4.1_10g017930.1	--	--	Molecular Function: iron ion transmembrane transporter activity (GO:0005381);; Cellular Component: integral component of membrane (GO:0016021);	K14685|2.7e-259|sly:101267281|K14685 solute carrier family 40 (iron-regulated transporter), member 1 | (RefSeq) solute carrier family 40 member 2-like isoform X1	[P]	Inorganic ion transport and metabolism	Ferroportin1 (FPN1)	Solute carrier family 40 member 2 OS=Arabidopsis thaliana OX=3702 GN=IREG2 PE=2 SV=1	Solute carrier family 40 protein OS=Nicotiana attenuata OX=49451 GN=IREG2 PE=3 SV=1	P	Inorganic ion transport and metabolism	solute carrier family 40 member 2-like isoform X1 [Solanum lycopersicum]
SMEL4.1_10g017940.1	--	--	Cellular Component: nucleus (GO:0005634);; Biological Process: ubiquitin-dependent protein catabolic process (GO:0006511);; Biological Process: protein ubiquitination (GO:0016567);; Cellular Component: SCF ubiquitin ligase complex (GO:0019005);	K10268|0.0e+00|sot:102589968|K10268 F-box and leucine-rich repeat protein 2/20 | (RefSeq) F-box/LRR-repeat protein 3	[R]	General function prediction only	Leucine Rich repeat	F-box/LRR-repeat protein 3 OS=Arabidopsis thaliana OX=3702 GN=FBL3 PE=2 SV=1	F-box protein, atfbl3 OS=Solanum tuberosum OX=4113 PE=4 SV=1	S	Function unknown	PREDICTED: F-box/LRR-repeat protein 3 [Solanum tuberosum]
SMEL4.1_10g017950.1	--	--	Cellular Component: plasma membrane (GO:0005886);; Cellular Component: integral component of membrane (GO:0016021);	--	--	--	Domain of unknown function (DUF588)	CASP-like protein 4B1 OS=Arabidopsis lyrata subsp. lyrata OX=81972 GN=ARALYDRAFT_321547 PE=3 SV=1	CASP-like protein OS=Solanum tuberosum OX=4113 GN=102590284 PE=3 SV=1	S	Function unknown	PREDICTED: CASP-like protein 4B1 [Solanum tuberosum]
SMEL4.1_10g017960.1	[T]	Signal transduction mechanisms	Molecular Function: protein serine/threonine phosphatase activity (GO:0004722);	K14497|1.2e-27|cpep:111805408|K14497 protein phosphatase 2C [EC:3.1.3.16] | (RefSeq) probable protein phosphatase 2C 53	[T]	Signal transduction mechanisms	Protein phosphatase 2C	Probable protein phosphatase 2C 33 OS=Arabidopsis thaliana OX=3702 GN=PPC6-1 PE=1 SV=1	Protein phosphatase-2c OS=Solanum tuberosum OX=4113 PE=4 SV=1	T	Signal transduction mechanisms	probable protein phosphatase 2C 65 [Solanum lycopersicum]
SMEL4.1_10g017970.1	--	--	Molecular Function: protein binding (GO:0005515);	K01188|3.5e-10|sly:101255017|K01188 beta-glucosidase [EC:3.2.1.21] | (RefSeq) beta-glucosidase 31-like	--	--	Kelch motif	--	DCD domain-containing protein OS=Solanum lycopersicum OX=4081 PE=4 SV=1	S	Function unknown	PREDICTED: uncharacterized protein LOC102595738 [Solanum tuberosum]
SMEL4.1_10g017990.1	--	--	Cellular Component: cellular_component (GO:0005575);; Cellular Component: intracellular (GO:0005622);; Cellular Component: obsolete cell (GO:0005623);; Cellular Component: cytoplasm (GO:0005737);; Cellular Component: cytosol (GO:0005829);; Cellular Component: obsolete intracellular part (GO:0044424);; Cellular Component: obsolete cytoplasmic part (GO:0044444);; Cellular Component: obsolete cell p…	K10268|9.0e-68|spen:107021285|K10268 F-box and leucine-rich repeat protein 2/20 | (RefSeq) F-box protein At3g58530	[R]	General function prediction only	--	F-box protein At3g58530 OS=Arabidopsis thaliana OX=3702 GN=At3g58530 PE=2 SV=1	F-box protein At3g58530-like isoform X2 OS=Gossypium hirsutum OX=3635 GN=LOC107948233 PE=4 SV=1	S	Function unknown	PREDICTED: F-box protein At3g58530-like isoform X2 [Gossypium hirsutum]
SMEL4.1_10g018000.1	--	--	Cellular Component: cytosol (GO:0005829);	K10268|7.5e-50|ini:109150673|K10268 F-box and leucine-rich repeat protein 2/20 | (RefSeq) F-box protein At3g58530	[R]	General function prediction only	Leucine Rich repeat	F-box protein At3g58530 OS=Arabidopsis thaliana OX=3702 GN=At3g58530 PE=2 SV=1	F-box protein At3g58530 isoform X2 OS=Capsicum annuum OX=4072 GN=LOC107873525 PE=4 SV=1	S	Function unknown	PREDICTED: F-box protein At3g58530 isoform X2 [Capsicum annuum]
SMEL4.1_10g018010.1	[T]	Signal transduction mechanisms	Molecular Function: protein kinase activity (GO:0004672);; Molecular Function: ATP binding (GO:0005524);	K04424|2.3e-26|sot:102596605|K04424 sterile alpha motif and leucine zipper containing kinase AZK [EC:2.7.11.25] | (RefSeq) serine/threonine-protein kinase EDR1	[T]	Signal transduction mechanisms	Phosphate-induced protein 1 conserved region	Serine/threonine-protein kinase STY46 OS=Arabidopsis thaliana OX=3702 GN=STY46 PE=1 SV=1	serine/threonine-protein kinase STY46-like isoform X1 OS=Capsicum annuum OX=4072 GN=LOC107851712 PE=4 SV=1	T	Signal transduction mechanisms	putative hippocampus abundant transcript-like protein 1-like [Capsicum annuum]
SMEL4.1_10g018020.1	--	--	Cellular Component: integral component of membrane (GO:0016021);	--	--	--	Ankyrin repeats (3 copies)	--	Ankyrin repeat-containing protein OS=Solanum tuberosum OX=4113 PE=4 SV=1	S	Function unknown	PREDICTED: ankyrin repeat-containing protein At5g02620-like [Nicotiana tabacum]
SMEL4.1_10g018030.1	[C]	Energy production and conversion	Molecular Function: citrate (Si)-synthase activity (GO:0004108);; Biological Process: tricarboxylic acid cycle (GO:0006099);; Biological Process: citrate metabolic process (GO:0006101);	K01647|3.3e-160|cann:107843119|K01647 citrate synthase [EC:2.3.3.1] | (RefSeq) CTS; citrate synthase, mitochondrial	[C]	Energy production and conversion	Citrate synthase, C-terminal domain	Citrate synthase, mitochondrial OS=Daucus carota OX=4039 GN=CS PE=2 SV=1	Citrate synthase OS=Capsicum chinense OX=80379 GN=BC332_02793 PE=3 SV=1	C	Energy production and conversion	Citrate synthase, mitochondrial [Capsicum annuum]
SMEL4.1_10g018040.1	--	--	--	--	--	--	--	--	Uncharacterized protein OS=Capsicum annuum OX=4072 GN=T459_07512 PE=4 SV=1	E	Amino acid transport and metabolism	hypothetical protein T459_07512 [Capsicum annuum]
SMEL4.1_10g018050.1	[Q]	Secondary metabolites biosynthesis, transport and catabolism	--	K07253|3.9e-48|nsy:104246674|K07253 phenylpyruvate tautomerase [EC:5.3.2.1] | (RefSeq) macrophage migration inhibitory factor homolog isoform X1	[V]	Defense mechanisms	Macrophage migration inhibitory factor (MIF)	--	Uncharacterized protein OS=Solanum lycopersicum OX=4081 PE=3 SV=1	V	Defense mechanisms	Macrophage migration inhibitory factor [Cynara cardunculus var. scolymus]
SMEL4.1_10g018060.1	--	--	Cellular Component: integral component of membrane (GO:0016021);	K20359|5.3e-98|sly:101245109|K20359 PRA1 family protein 1 | (RefSeq) PRA1 family protein B4	[U]	Intracellular trafficking, secretion, and vesicular transport	PRA1 family protein	PRA1 family protein B4 OS=Arabidopsis thaliana OX=3702 GN=PRA1B4 PE=1 SV=1	PRA1 family protein OS=Solanum lycopersicum OX=4081 GN=101245109 PE=3 SV=1	P	Inorganic ion transport and metabolism	hypothetical protein EJD97_003042 [Solanum chilense]
SMEL4.1_10g018070.1	--	--	Molecular Function: DNA binding (GO:0003677);; Molecular Function: DNA-binding transcription factor activity (GO:0003700);; Cellular Component: nucleus (GO:0005634);	K09286|3.5e-34|rcu:8272098|K09286 EREBP-like factor | (RefSeq) dehydration-responsive element-binding protein 2C	--	--	AP2 domain	Dehydration-responsive element-binding protein 2A OS=Arabidopsis thaliana OX=3702 GN=DREB2A PE=1 SV=1	AP2/ERF domain-containing transcription factor OS=Solanum tuberosum OX=4113 GN=107058148 PE=4 SV=1	K	Transcription	PREDICTED: uncharacterized protein LOC107058148 [Solanum tuberosum]
SMEL4.1_10g018080.1	--	--	--	--	--	--	--	--	Uncharacterized protein OS=Solanum tuberosum OX=4113 PE=4 SV=1	--	--	putative 40S ribosomal protein S8-like [Capsicum annuum]
SMEL4.1_10g018090.1	--	--	Molecular Function: DNA-binding transcription factor activity (GO:0003700);; Biological Process: transcription, DNA-templated (GO:0006351);; Biological Process: brassinosteroid mediated signaling pathway (GO:0009742);	K14503|1.0e-19|sind:105176178|K14503 brassinosteroid resistant 1/2 | (RefSeq) BES1/BZR1 homolog protein 2-like	--	--	BES1/BZR1 plant transcription factor, N-terminal	BES1/BZR1 homolog protein 3 OS=Arabidopsis thaliana OX=3702 GN=BEH3 PE=1 SV=1	Protein BRASSINAZOLE-RESISTANT 2 OS=Solanum tuberosum OX=4113 PE=3 SV=1	S	Function unknown	protein BRASSINAZOLE-RESISTANT 2-like [Solanum lycopersicum]
SMEL4.1_10g018100.1	--	--	Cellular Component: integral component of membrane (GO:0016021);	K23877|3.1e-37|pvu:PHAVU_002G073700g|K23877 xyloglucan O-acetyltransferase | (RefSeq) hypothetical protein	--	--	GDSL/SGNH-like Acyl-Esterase family found in Pmr5 and Cas1p	Protein trichome birefringence-like 34 OS=Arabidopsis thaliana OX=3702 GN=TBL34 PE=2 SV=2	protein trichome birefringence-like 34 isoform X1 OS=Capsicum annuum OX=4072 GN=LOC107852434 PE=3 SV=1	S	Function unknown	PREDICTED: protein trichome birefringence-like 34 [Solanum tuberosum]
SMEL4.1_10g018110.1	--	--	--	--	--	--	Domain of unknown function (DUF4283)	--	Putative ovule protein OS=Solanum chacoense OX=4108 PE=4 SV=1	--	--	hypothetical protein FXO38_04149 [Capsicum annuum]
SMEL4.1_10g018120.1	--	--	Biological Process: response to acid chemical (GO:0001101);; Molecular Function: molecular_function (GO:0003674);; Molecular Function: enzyme inhibitor activity (GO:0004857);; Molecular Function: protein phosphatase inhibitor activity (GO:0004864);; Molecular Function: binding (GO:0005488);; Molecular Function: protein binding (GO:0005515);; Cellular Component: cellular_component (GO:0005575);; C…	K14496|3.5e-104|sot:102591866|K14496 abscisic acid receptor PYR/PYL family | (RefSeq) abscisic acid receptor PYL4-like	--	--	Polyketide cyclase / dehydrase and lipid transport	Abscisic acid receptor PYL4 OS=Arabidopsis thaliana OX=3702 GN=PYL4 PE=1 SV=1	Abscisic acid receptor PYL4 OS=Solanum tuberosum OX=4113 GN=102591866 PE=3 SV=1	S	Function unknown	PREDICTED: abscisic acid receptor PYL4-like [Solanum tuberosum]
SMEL4.1_10g018130.1	--	--	--	--	--	--	Protein of unknown function, DUF538	Uncharacterized protein At5g01610 OS=Arabidopsis thaliana OX=3702 GN=At5g01610 PE=1 SV=1	Uncharacterized protein OS=Solanum lycopersicum OX=4081 GN=101246292 PE=4 SV=1	S	Function unknown	uncharacterized protein At5g01610 [Solanum lycopersicum]
SMEL4.1_10g018140.1	--	--	--	--	--	--	--	--	Uncharacterized protein OS=Capsicum chinense OX=80379 GN=BC332_26076 PE=4 SV=1	--	--	hypothetical protein BC332_26076 [Capsicum chinense]
SMEL4.1_10g018150.1	--	--	Molecular Function: protein kinase activity (GO:0004672);; Molecular Function: calcium ion binding (GO:0005509);; Molecular Function: ATP binding (GO:0005524);; Cellular Component: integral component of membrane (GO:0016021);; Molecular Function: polysaccharide binding (GO:0030247);	K00430|8.1e-11|nnu:104598179|K00430 peroxidase [EC:1.11.1.7] | (RefSeq) wall-associated receptor kinase 2-like	--	--	Complement Clr-like EGF-like	Wall-associated receptor kinase 2 OS=Arabidopsis thaliana OX=3702 GN=WAK2 PE=1 SV=1	ATP binding protein OS=Solanum tuberosum OX=4113 PE=4 SV=1	T	Signal transduction mechanisms	PREDICTED: uncharacterized protein LOC102582197 [Solanum tuberosum]
SMEL4.1_10g018160.1	[O]	Posttranslational modification, protein turnover, chaperones	Molecular Function: protein serine/threonine kinase activity (GO:0004674);; Molecular Function: calcium ion binding (GO:0005509);; Molecular Function: ATP binding (GO:0005524);; Cellular Component: plasma membrane (GO:0005886);; Biological Process: protein phosphorylation (GO:0006468);; Biological Process: cell surface receptor signaling pathway (GO:0007166);; Cellular Component: integral compone…	K23544|6.1e-58|brp:103842861|K23544 serine incorporator 1/3 | (RefSeq) serine incorporator 3	--	--	Protein kinase domain	Wall-associated receptor kinase-like 1 OS=Arabidopsis thaliana OX=3702 GN=WAKL1 PE=2 SV=1	wall-associated receptor kinase 2-like OS=Nicotiana tabacum OX=4097 GN=LOC107817466 PE=4 SV=1	T	Signal transduction mechanisms	PREDICTED: wall-associated receptor kinase 2-like [Nicotiana tabacum]
SMEL4.1_10g018170.1	[M]	Cell wall/membrane/envelope biogenesis	Molecular Function: protein serine/threonine kinase activity (GO:0004674);; Molecular Function: calcium ion binding (GO:0005509);; Molecular Function: ATP binding (GO:0005524);; Cellular Component: plasma membrane (GO:0005886);; Biological Process: protein phosphorylation (GO:0006468);; Biological Process: cell surface receptor signaling pathway (GO:0007166);; Cellular Component: integral compone…	K23544|6.2e-66|brp:103842861|K23544 serine incorporator 1/3 | (RefSeq) serine incorporator 3	--	--	Protein kinase domain	Wall-associated receptor kinase 5 OS=Arabidopsis thaliana OX=3702 GN=WAK5 PE=2 SV=1	wall-associated receptor kinase 2-like OS=Nicotiana tabacum OX=4097 GN=LOC107817466 PE=4 SV=1	T	Signal transduction mechanisms	uncharacterized protein LOC107001596 [Solanum pennellii]
SMEL4.1_10g018180.1	[M]	Cell wall/membrane/envelope biogenesis	Molecular Function: protein kinase activity (GO:0004672);; Molecular Function: calcium ion binding (GO:0005509);; Molecular Function: ATP binding (GO:0005524);; Cellular Component: integral component of membrane (GO:0016021);; Molecular Function: polysaccharide binding (GO:0030247);	K23544|4.5e-36|brp:103842861|K23544 serine incorporator 1/3 | (RefSeq) serine incorporator 3	--	--	Protein kinase domain	Wall-associated receptor kinase 5 OS=Arabidopsis thaliana OX=3702 GN=WAK5 PE=2 SV=1	ATP binding protein OS=Solanum tuberosum OX=4113 PE=4 SV=1	T	Signal transduction mechanisms	uncharacterized protein LOC107001596 [Solanum pennellii]
SMEL4.1_10g018190.1	--	--	--	--	--	--	EGF-like domain	--	--	--	--	--
SMEL4.1_10g018200.1	--	--	Cellular Component: integral component of membrane (GO:0016021);	K23877|2.7e-10|psom:113291239|K23877 xyloglucan O-acetyltransferase | (RefSeq) protein ALTERED XYLOGLUCAN 4-like	--	--	GDSL/SGNH-like Acyl-Esterase family found in Pmr5 and Cas1p	Protein trichome birefringence-like 3 OS=Arabidopsis thaliana OX=3702 GN=TBL3 PE=2 SV=1	PMR5N domain-containing protein OS=Solanum lycopersicum OX=4081 GN=101247477 PE=3 SV=1	S	Function unknown	hypothetical protein EJD97_013146 [Solanum chilense]
SMEL4.1_10g018210.1	--	--	Molecular Function: protein binding (GO:0005515);	--	--	--	Tetratricopeptide repeat	Ethylene-overproduction protein 1 OS=Arabidopsis thaliana OX=3702 GN=ETO1 PE=1 SV=2	Ethylene-overproduction protein 1 OS=Solanum tuberosum OX=4113 PE=4 SV=1	S	Function unknown	PREDICTED: ethylene-overproduction protein 1-like [Solanum tuberosum]
SMEL4.1_10g018220.1	--	--	Molecular Function: DNA binding (GO:0003677);; Cellular Component: nucleus (GO:0005634);	K14491|1.3e-08|thj:104803637|K14491 two-component response regulator ARR-B family | (RefSeq) two-component response regulator ARR12 isoform X2	--	--	Myb-like DNA-binding domain	Myb family transcription factor MOF1 OS=Oryza sativa subsp. japonica OX=39947 GN=MOF1 PE=1 SV=1	HTH myb-type domain-containing protein OS=Solanum lycopersicum OX=4081 GN=101244920 PE=4 SV=1	K	Transcription	uncharacterized protein LOC107001830 [Solanum pennellii]
SMEL4.1_10g018230.1	[P]	Inorganic ion transport and metabolism	Cellular Component: integral component of plasma membrane (GO:0005887);; Molecular Function: ammonium transmembrane transporter activity (GO:0008519);	K03320|3.0e-266|cann:107845987|K03320 ammonium transporter, Amt family | (RefSeq) ammonium transporter 2	[P]	Inorganic ion transport and metabolism	Ammonium Transporter Family	Ammonium transporter 2 OS=Arabidopsis thaliana OX=3702 GN=AMT2 PE=1 SV=2	Ammonium transporter OS=Capsicum baccatum OX=33114 GN=CQW23_23688 PE=3 SV=1	P	Inorganic ion transport and metabolism	Ammonium transporter 2 member 2 [Capsicum baccatum]
SMEL4.1_10g018240.1	--	--	Molecular Function: protein binding (GO:0005515);	--	[R]	General function prediction only	Leucine rich repeat	Receptor-like protein 18 OS=Arabidopsis thaliana OX=3702 GN=RLP18 PE=2 SV=3	Putative receptor-like protein 12-like OS=Solanum chacoense OX=4108 PE=4 SV=1	S	Function unknown	PREDICTED: receptor-like protein 12 [Solanum tuberosum]
SMEL4.1_10g018250.1	--	--	Molecular Function: protein binding (GO:0005515);; Cellular Component: cellular_component (GO:0005575);; Cellular Component: obsolete cell (GO:0005623);; Cellular Component: plasma membrane (GO:0005886);; Biological Process: biological_process (GO:0008150);; Biological Process: tissue development (GO:0009888);; Biological Process: meristem maintenance (GO:0010073);; Cellular Component: membrane (…	--	--	--	Leucine Rich repeats (2 copies)	--	LOW QUALITY PROTEIN: receptor-like protein 12 OS=Nicotiana sylvestris OX=4096 GN=LOC104220231 PE=4 SV=1	S	Function unknown	PREDICTED: LOW QUALITY PROTEIN: receptor-like protein 12, partial [Nicotiana sylvestris]
SMEL4.1_10g018260.1	--	--	Cellular Component: integral component of membrane (GO:0016021);	--	--	--	--	--	Verticillium wilt disease resistance protein OS=Solanum tuberosum OX=4113 GN=102593765 PE=4 SV=1	S	Function unknown	PREDICTED: leucine-rich repeat receptor-like serine/threonine-protein kinase At1g17230 isoform X2 [Solanum tuberosum]
SMEL4.1_10g018270.1	--	--	--	--	--	--	--	--	Uncharacterized protein OS=Medicago truncatula OX=3880 GN=MTR_0082s0080 PE=4 SV=1	--	--	NADH-ubiquinone oxidoreductase chain 4 [Capsicum annuum]
SMEL4.1_10g018280.1	[GHR]	--	Molecular Function: magnesium ion binding (GO:0000287);; Cellular Component: cytosol (GO:0005829);; Molecular Function: carboxy-lyase activity (GO:0016831);; Molecular Function: thiamine pyrophosphate binding (GO:0030976);	K01568|0.0e+00|nta:107766552|K01568 pyruvate decarboxylase [EC:4.1.1.1] | (RefSeq) pyruvate decarboxylase 1-like	[EH]	--	Thiamine pyrophosphate enzyme, N-terminal TPP binding domain	Pyruvate decarboxylase 1 OS=Arabidopsis thaliana OX=3702 GN=PDC1 PE=2 SV=1	Pyruvate decarboxylase OS=Nicotiana tabacum OX=4097 GN=LOC107766552 PE=3 SV=1	--	--	PREDICTED: pyruvate decarboxylase 1-like [Nicotiana tabacum]
SMEL4.1_10g018290.1	[M]	Cell wall/membrane/envelope biogenesis	Molecular Function: protein kinase activity (GO:0004672);; Molecular Function: calcium ion binding (GO:0005509);; Molecular Function: ATP binding (GO:0005524);; Cellular Component: integral component of membrane (GO:0016021);; Molecular Function: polysaccharide binding (GO:0030247);	K23544|1.3e-111|brp:103842861|K23544 serine incorporator 1/3 | (RefSeq) serine incorporator 3	--	--	Protein kinase domain	Wall-associated receptor kinase 2 OS=Arabidopsis thaliana OX=3702 GN=WAK2 PE=1 SV=1	ATP binding protein OS=Solanum tuberosum OX=4113 PE=4 SV=1	T	Signal transduction mechanisms	PREDICTED: wall-associated receptor kinase 2-like [Solanum tuberosum]
SMEL4.1_10g018300.1	--	--	Cellular Component: integral component of membrane (GO:0016021);	--	--	--	--	--	uncharacterized protein LOC107873318 OS=Capsicum annuum OX=4072 GN=LOC107873318 PE=4 SV=1	--	--	PREDICTED: uncharacterized protein LOC107873318 [Capsicum annuum]
SMEL4.1_10g018310.1	[M]	Cell wall/membrane/envelope biogenesis	Molecular Function: protein serine/threonine kinase activity (GO:0004674);; Molecular Function: calcium ion binding (GO:0005509);; Molecular Function: ATP binding (GO:0005524);; Cellular Component: plasma membrane (GO:0005886);; Biological Process: protein phosphorylation (GO:0006468);; Biological Process: cell surface receptor signaling pathway (GO:0007166);; Cellular Component: integral compone…	K23544|5.2e-27|brp:103842861|K23544 serine incorporator 1/3 | (RefSeq) serine incorporator 3	--	--	Protein kinase domain	Wall-associated receptor kinase-like 2 OS=Arabidopsis thaliana OX=3702 GN=WAKL2 PE=2 SV=1	wall-associated receptor kinase 2-like OS=Nicotiana tabacum OX=4097 GN=LOC107817466 PE=4 SV=1	T	Signal transduction mechanisms	uncharacterized protein LOC107001596 [Solanum pennellii]
SMEL4.1_10g018320.1	--	--	Molecular Function: protein kinase activity (GO:0004672);; Molecular Function: calcium ion binding (GO:0005509);; Molecular Function: ATP binding (GO:0005524);; Cellular Component: integral component of membrane (GO:0016021);; Molecular Function: polysaccharide binding (GO:0030247);	--	--	--	--	Wall-associated receptor kinase 5 OS=Arabidopsis thaliana OX=3702 GN=WAK5 PE=2 SV=1	ATP binding protein OS=Solanum tuberosum OX=4113 PE=4 SV=1	T	Signal transduction mechanisms	PREDICTED: wall-associated receptor kinase 2-like [Solanum tuberosum]
SMEL4.1_10g018330.1	[M]	Cell wall/membrane/envelope biogenesis	Molecular Function: protein kinase activity (GO:0004672);; Molecular Function: calcium ion binding (GO:0005509);; Molecular Function: ATP binding (GO:0005524);; Cellular Component: integral component of membrane (GO:0016021);; Molecular Function: polysaccharide binding (GO:0030247);	K23544|1.4e-115|brp:103842861|K23544 serine incorporator 1/3 | (RefSeq) serine incorporator 3	--	--	Protein kinase domain	Wall-associated receptor kinase 2 OS=Arabidopsis thaliana OX=3702 GN=WAK2 PE=1 SV=1	ATP binding protein OS=Solanum tuberosum OX=4113 PE=4 SV=1	T	Signal transduction mechanisms	PREDICTED: uncharacterized protein LOC102582197 [Solanum tuberosum]
SMEL4.1_10g018340.1	--	--	--	--	--	--	--	--	Uncharacterized protein OS=Capsicum chinense OX=80379 GN=BC332_26076 PE=4 SV=1	--	--	hypothetical protein BC332_26076 [Capsicum chinense]
SMEL4.1_10g018350.1	--	--	Cellular Component: integral component of membrane (GO:0016021);	K23877|6.0e-37|ath:AT1G70230|K23877 xyloglucan O-acetyltransferase | (RefSeq) TBL27; TRICHOME BIREFRINGENCE-LIKE 27	--	--	GDSL/SGNH-like Acyl-Esterase family found in Pmr5 and Cas1p	Protein trichome birefringence-like 3 OS=Arabidopsis thaliana OX=3702 GN=TBL3 PE=2 SV=1	PMR5N domain-containing protein OS=Solanum lycopersicum OX=4081 GN=101247477 PE=3 SV=1	S	Function unknown	PREDICTED: protein trichome birefringence-like 3 [Solanum tuberosum]
SMEL4.1_10g018360.1	--	--	Molecular Function: phosphoric ester hydrolase activity (GO:0042578);	K21797|2.9e-272|spen:107002691|K21797 phosphatidylinositol 4-phosphatase [EC:3.1.3.-] | (RefSeq) phosphoinositide phosphatase SAC8 isoform X1	[I]	Lipid transport and metabolism	SacI homology domain	Phosphoinositide phosphatase SAC8 OS=Arabidopsis thaliana OX=3702 GN=SAC8 PE=2 SV=1	Putative phosphoinositide phosphatase SAC8-like OS=Solanum chacoense OX=4108 PE=4 SV=1	I	Lipid transport and metabolism	phosphoinositide phosphatase SAC8 isoform X2 [Solanum pennellii]
SMEL4.1_10g018370.1	[I]	Lipid transport and metabolism	Molecular Function: acyl-CoA dehydrogenase activity (GO:0003995);; Molecular Function: flavin adenine dinucleotide binding (GO:0050660);	K00232|3.9e-233|sly:101248057|K00232 acyl-CoA oxidase [EC:1.3.3.6] | (RefSeq) acyl-coenzyme A oxidase 4, peroxisomal	[E]	Amino acid transport and metabolism	Acyl-CoA dehydrogenase, C-terminal domain	Acyl-coenzyme A oxidase 4, peroxisomal OS=Arabidopsis thaliana OX=3702 GN=ACX4 PE=1 SV=1	Acyl-CoA dehydrogenase OS=Solanum tuberosum OX=4113 GN=102581426 PE=3 SV=1	E	Amino acid transport and metabolism	hypothetical protein EJD97_003033 [Solanum chilense]
SMEL4.1_10g018380.1	[J]	Translation, ribosomal structure and biogenesis	Molecular Function: nucleic acid binding (GO:0003676);; Molecular Function: lysine-tRNA ligase activity (GO:0004824);; Molecular Function: ATP binding (GO:0005524);; Cellular Component: cytoplasm (GO:0005737);; Biological Process: lysyl-tRNA aminoacylation (GO:0006430);	K04567|7.7e-156|sot:102581756|K04567 lysyl-tRNA synthetase, class II [EC:6.1.1.6] | (RefSeq) lysine--tRNA ligase	[J]	Translation, ribosomal structure and biogenesis	tRNA synthetases class II (D, K and N)	Lysine--tRNA ligase OS=Solanum lycopersicum OX=4081 GN=LYSRS PE=2 SV=1	Lysine--tRNA ligase OS=Solanum tuberosum OX=4113 GN=102581756 PE=3 SV=1	J	Translation, ribosomal structure and biogenesis	PREDICTED: lysine--tRNA ligase [Solanum tuberosum]
SMEL4.1_10g018390.1	--	--	--	--	--	--	--	--	Uncharacterized protein OS=Solanum lycopersicum OX=4081 GN=101256298 PE=4 SV=1	--	--	uncharacterized protein LOC101256298 isoform X1 [Solanum lycopersicum]
SMEL4.1_10g018400.1	--	--	Molecular Function: protein binding (GO:0005515);	--	--	--	F-box-like	Putative F-box protein At3g52320 OS=Arabidopsis thaliana OX=3702 GN=At3g52320 PE=4 SV=1	F-box domain-containing protein OS=Solanum lycopersicum OX=4081 PE=4 SV=1	--	--	hypothetical protein EJD97_003035 [Solanum chilense]
SMEL4.1_10g018410.1	[I]	Lipid transport and metabolism	Molecular Function: acyl-CoA dehydrogenase activity (GO:0003995);; Molecular Function: flavin adenine dinucleotide binding (GO:0050660);	K00232|3.4e-114|sot:102581426|K00232 acyl-CoA oxidase [EC:1.3.3.6] | (RefSeq) acyl-coenzyme A oxidase 4, peroxisomal	[E]	Amino acid transport and metabolism	Acyl-CoA dehydrogenase, C-terminal domain	Acyl-coenzyme A oxidase 4, peroxisomal OS=Arabidopsis thaliana OX=3702 GN=ACX4 PE=1 SV=1	Putative acyl-coenzyme A oxidase 4, peroxisomal-like OS=Solanum chacoense OX=4108 PE=3 SV=1	E	Amino acid transport and metabolism	PREDICTED: acyl-coenzyme A oxidase 4, peroxisomal [Solanum tuberosum]
SMEL4.1_10g018420.1	[J]	Translation, ribosomal structure and biogenesis	Molecular Function: nucleic acid binding (GO:0003676);; Molecular Function: lysine-tRNA ligase activity (GO:0004824);; Molecular Function: ATP binding (GO:0005524);; Cellular Component: cytoplasm (GO:0005737);; Biological Process: lysyl-tRNA aminoacylation (GO:0006430);	K04567|8.2e-94|sot:102581756|K04567 lysyl-tRNA synthetase, class II [EC:6.1.1.6] | (RefSeq) lysine--tRNA ligase	[J]	Translation, ribosomal structure and biogenesis	tRNA synthetases class II (D, K and N)	Lysine--tRNA ligase OS=Solanum lycopersicum OX=4081 GN=LYSRS PE=2 SV=1	Lysine--tRNA ligase OS=Solanum tuberosum OX=4113 GN=102581756 PE=3 SV=1	J	Translation, ribosomal structure and biogenesis	hypothetical protein EJD97_003034 [Solanum chilense]
SMEL4.1_10g018430.1	--	--	--	--	--	--	--	--	Putative ovule protein OS=Solanum chacoense OX=4108 PE=4 SV=1	--	--	uncharacterized protein LOC101256298 isoform X1 [Solanum lycopersicum]
SMEL4.1_10g018440.1	--	--	--	--	--	--	--	--	Uncharacterized protein (Fragment) OS=Ensete ventricosum OX=4639 GN=GW17_00058448 PE=4 SV=1	--	--	hypothetical protein BHE74_00052268 [Ensete ventricosum]
SMEL4.1_10g018450.1	--	--	--	--	--	--	--	--	Uncharacterized protein OS=Solanum tuberosum OX=4113 PE=4 SV=1	--	--	--
SMEL4.1_10g018460.1	--	--	--	--	--	--	--	--	F-box domain-containing protein OS=Solanum lycopersicum OX=4081 PE=4 SV=1	--	--	putative F-box protein At3g52320 [Solanum pennellii]
SMEL4.1_10g018470.1	--	--	Molecular Function: protein binding (GO:0005515);	--	--	--	F-box-like	Putative F-box protein At3g52320 OS=Arabidopsis thaliana OX=3702 GN=At3g52320 PE=4 SV=1	F-box domain-containing protein OS=Solanum lycopersicum OX=4081 PE=4 SV=1	--	--	hypothetical protein EJD97_003035 [Solanum chilense]
SMEL4.1_10g018480.1	--	--	Cellular Component: integral component of membrane (GO:0016021);	--	--	--	--	Protein METHYLENE BLUE SENSITIVITY 1 OS=Arabidopsis thaliana OX=3702 GN=MBS1 PE=2 SV=1	Uncharacterized protein (Fragment) OS=Gossypium raimondii OX=29730 GN=B456_004G261900 PE=4 SV=1	S	Function unknown	hypothetical protein ES288_A08G268200v1, partial [Gossypium darwinii]
SMEL4.1_10g018490.1	[G]	Carbohydrate transport and metabolism	Molecular Function: polygalacturonase activity (GO:0004650);; Cellular Component: extracellular region (GO:0005576);; Biological Process: carbohydrate metabolic process (GO:0005975);; Biological Process: cell wall organization (GO:0071555);	K01213|3.9e-165|sly:101248624|K01213 galacturan 1,4-alpha-galacturonidase [EC:3.2.1.67] | (RefSeq) exopolygalacturonase-like	--	--	Glycosyl hydrolases family 28	Exopolygalacturonase (Fragment) OS=Platanus acerifolia OX=140101 GN=plaa2 PE=1 SV=1	Uncharacterized protein OS=Solanum lycopersicum OX=4081 GN=101248624 PE=3 SV=1	G	Carbohydrate transport and metabolism	exopolygalacturonase-like [Solanum pennellii]
SMEL4.1_10g018500.1	--	--	--	K14766|1.3e-26|nau:109227645|K14766 nucleolar protein 14 | (RefSeq) mitotic apparatus protein p62-like	--	--	Reverse transcriptase (RNA-dependent DNA polymerase)	--	Putative ovule protein OS=Solanum chacoense OX=4108 PE=4 SV=1	S	Function unknown	PREDICTED: uncharacterized protein LOC107058099 [Solanum tuberosum]
SMEL4.1_10g018510.1	[Q]	Secondary metabolites biosynthesis, transport and catabolism	Molecular Function: oxidoreductase activity (GO:0016491);; Molecular Function: metal ion binding (GO:0046872);	K05277|3.7e-69|nnu:104596229|K05277 anthocyanidin synthase [EC:1.14.20.4] | (RefSeq) leucoanthocyanidin dioxygenase-like	[QR]	--	non-haem dioxygenase in morphine synthesis N-terminal	Probable 2-oxoglutarate-dependent dioxygenase JRG21 OS=Arabidopsis thaliana OX=3702 GN=JRG21 PE=2 SV=1	Fe2OG dioxygenase domain-containing protein OS=Capsicum baccatum OX=33114 GN=CQW23_23926 PE=3 SV=1	Q	Secondary metabolites biosynthesis, transport and catabolism	hypothetical protein CQW23_23926 [Capsicum baccatum]
SMEL4.1_10g018520.1	[Q]	Secondary metabolites biosynthesis, transport and catabolism	Molecular Function: oxidoreductase activity (GO:0016491);; Molecular Function: metal ion binding (GO:0046872);	K24028|2.7e-65|mdm:103426498|K24028 salicylic acid 3-hydroxylase [EC:1.14.11.-] | (RefSeq) protein DOWNY MILDEW RESISTANCE 6-like	[QR]	--	non-haem dioxygenase in morphine synthesis N-terminal	Probable 2-oxoglutarate-dependent dioxygenase At5g05600 OS=Arabidopsis thaliana OX=3702 GN=At5g05600 PE=2 SV=1	Fe2OG dioxygenase domain-containing protein OS=Capsicum chinense OX=80379 GN=BC332_25878 PE=3 SV=1	Q	Secondary metabolites biosynthesis, transport and catabolism	probable 2-oxoglutarate-dependent dioxygenase At5g05600 [Solanum pennellii]
SMEL4.1_10g018530.1	[O]	Posttranslational modification, protein turnover, chaperones	--	K13993|3.9e-85|cann:107844800|K13993 HSP20 family protein | (RefSeq) 18.1 kDa class I heat shock protein-like	[O]	Posttranslational modification, protein turnover, chaperones	Hsp20/alpha crystallin family	18.1 kDa class I heat shock protein OS=Pisum sativum OX=3888 GN=HSP18.1 PE=1 SV=1	SHSP domain-containing protein (Fragment) OS=Capsicum baccatum OX=33114 GN=CQW23_23990 PE=3 SV=1	O	Posttranslational modification, protein turnover, chaperones	hypothetical protein CQW23_23990, partial [Capsicum baccatum]
SMEL4.1_10g018540.1	[R]	General function prediction only	Molecular Function: protein binding (GO:0005515);	K15026|3.9e-23|cre:CHLREDRAFT_148563|K15026 translation initiation factor 2A | (RefSeq) EIF2Aa; eukaryotic initiation factor	--	--	SnoaL-like domain	--	Putative F-box protein SKIP8-like OS=Solanum chacoense OX=4108 PE=4 SV=1	S	Function unknown	PREDICTED: uncharacterized protein LOC102592462 isoform X2 [Solanum tuberosum]
SMEL4.1_10g018550.1	--	--	Cellular Component: integral component of membrane (GO:0016021);	K22697|2.0e-134|sly:101262647|K22697 sphingomyelin synthase-related protein 1 | (RefSeq) phosphatidylinositol:ceramide inositolphosphotransferase 2	[S]	Function unknown	PAP2 superfamily C-terminal	Phosphatidylinositol:ceramide inositolphosphotransferase 1 OS=Arabidopsis thaliana OX=3702 GN=IPCS1 PE=2 SV=1	PAP2_C domain-containing protein OS=Solanum tuberosum OX=4113 GN=102592126 PE=4 SV=1	S	Function unknown	PREDICTED: phosphatidylinositol:ceramide inositolphosphotransferase 1-like [Solanum tuberosum]
SMEL4.1_10g018560.1	--	--	Molecular Function: zinc ion binding (GO:0008270);; Cellular Component: integral component of membrane (GO:0016021);	--	[A]	RNA processing and modification	RING-variant domain	--	Zinc finger family protein OS=Solanum tuberosum OX=4113 GN=102591798 PE=4 SV=1	A	RNA processing and modification	PREDICTED: uncharacterized protein LOC102591798 [Solanum tuberosum]
SMEL4.1_10g018570.1	--	--	--	--	--	--	PAR1 protein	--	NtEIG-E80 protein OS=Solanum tuberosum OX=4113 GN=102591129 PE=4 SV=1	S	Function unknown	PREDICTED: uncharacterized protein LOC102591129 [Solanum tuberosum]
SMEL4.1_10g018580.1	[G]	Carbohydrate transport and metabolism	Biological Process: carbohydrate metabolic process (GO:0005975);; Molecular Function: fructose 1,6-bisphosphate 1-phosphatase activity (GO:0042132);	K03841|1.4e-213|cann:107845980|K03841 fructose-1,6-bisphosphatase I [EC:3.1.3.11] | (RefSeq) fructose-1,6-bisphosphatase, chloroplastic-like	[G]	Carbohydrate transport and metabolism	Fructose-1-6-bisphosphatase, N-terminal domain	Fructose-1,6-bisphosphatase, chloroplastic OS=Brassica napus OX=3708 GN=FBP PE=2 SV=1	D-fructose-1,6-bisphosphate 1-phosphohydrolase OS=Capsicum baccatum OX=33114 GN=CQW23_23919 PE=3 SV=1	G	Carbohydrate transport and metabolism	Fructose-1,6-bisphosphatase, chloroplastic [Capsicum baccatum]
SMEL4.1_10g018590.1	[G]	Carbohydrate transport and metabolism	Biological Process: carbohydrate metabolic process (GO:0005975);; Molecular Function: fructose 1,6-bisphosphate 1-phosphatase activity (GO:0042132);	K03841|3.5e-225|sot:102590424|K03841 fructose-1,6-bisphosphatase I [EC:3.1.3.11] | (RefSeq) fructose-1,6-bisphosphatase, chloroplastic-like	[G]	Carbohydrate transport and metabolism	Fructose-1-6-bisphosphatase, N-terminal domain	Fructose-1,6-bisphosphatase, chloroplastic OS=Oryza sativa subsp. indica OX=39946 GN=OsI_10887 PE=1 SV=1	D-fructose-1,6-bisphosphate 1-phosphohydrolase OS=Solanum tuberosum OX=4113 GN=102590424 PE=3 SV=1	G	Carbohydrate transport and metabolism	hypothetical protein EJD97_002927 [Solanum chilense]
SMEL4.1_10g018600.1	--	--	--	--	--	--	--	--	cell wall protein RBR3 isoform X1 OS=Capsicum annuum OX=4072 GN=LOC107845979 PE=4 SV=1	--	--	hypothetical protein FXO37_33299 [Capsicum annuum]
SMEL4.1_10g018610.1	--	--	Molecular Function: GTPase activity (GO:0003924);; Molecular Function: structural constituent of cytoskeleton (GO:0005200);; Molecular Function: GTP binding (GO:0005525);; Cellular Component: cytoplasm (GO:0005737);; Cellular Component: microtubule (GO:0005874);; Biological Process: microtubule-based process (GO:0007017);	K07375|8.8e-262|cann:107845981|K07375 tubulin beta | (RefSeq) tubulin beta-2 chain-like	[Z]	Cytoskeleton	Tubulin/FtsZ family, GTPase domain	Tubulin beta-2 chain OS=Oryza sativa subsp. japonica OX=39947 GN=TUBB2 PE=2 SV=1	Tubulin beta chain OS=Capsicum baccatum OX=33114 GN=CQW23_23918 PE=3 SV=1	Z	Cytoskeleton	PREDICTED: tubulin beta-2 chain-like [Capsicum annuum]
SMEL4.1_10g018620.1	[J]	Translation, ribosomal structure and biogenesis	Molecular Function: structural constituent of ribosome (GO:0003735);; Cellular Component: ribosome (GO:0005840);; Biological Process: translation (GO:0006412);	K02939|1.3e-117|spen:107018649|K02939 large subunit ribosomal protein L9 | (RefSeq) uncharacterized protein LOC107018649	[J]	Translation, ribosomal structure and biogenesis	Ribosomal protein L9, N-terminal domain	--	50S ribosomal protein L9, chloroplastic OS=Solanum lycopersicum OX=4081 PE=3 SV=1	J	Translation, ribosomal structure and biogenesis	uncharacterized protein LOC107018649 [Solanum pennellii]
SMEL4.1_10g018630.1	--	--	Molecular Function: thiol-dependent ubiquitin-specific protease activity (GO:0004843);; Biological Process: protein deubiquitination (GO:0016579);	K11863|7.8e-104|sot:102589779|K11863 Ataxin-3 [EC:3.4.22.-] | (RefSeq) ataxin-3 homolog	[R]	General function prediction only	Josephin	Ataxin-3 homolog OS=Arabidopsis thaliana OX=3702 GN=At3g54130 PE=1 SV=1	Ubiquitinyl hydrolase 1 OS=Solanum tuberosum OX=4113 PE=4 SV=1	O	Posttranslational modification, protein turnover, chaperones	PREDICTED: ataxin-3 homolog [Solanum tuberosum]
SMEL4.1_10g018640.1	[Q]	Secondary metabolites biosynthesis, transport and catabolism	Molecular Function: oxidoreductase activity (GO:0016491);; Molecular Function: metal ion binding (GO:0046872);	K05278|2.0e-56|psom:113346476|K05278 flavonol synthase [EC:1.14.20.6] | (RefSeq) flavonol synthase/flavanone 3-hydroxylase-like	[QR]	--	2OG-Fe(II) oxygenase superfamily	Probable 2-oxoglutarate-dependent dioxygenase ANS OS=Arabidopsis thaliana OX=3702 GN=ANS PE=2 SV=1	Ethylene-forming-enzyme-like dioxygenase OS=Solanum tuberosum OX=4113 GN=102588798 PE=3 SV=1	Q	Secondary metabolites biosynthesis, transport and catabolism	PREDICTED: codeine O-demethylase-like [Solanum tuberosum]
SMEL4.1_10g018650.1	[Q]	Secondary metabolites biosynthesis, transport and catabolism	Molecular Function: oxidoreductase activity (GO:0016491);; Molecular Function: metal ion binding (GO:0046872);	K14975|1.2e-51|psom:113311621|K14975 codeine 3-O-demethylase [EC:1.14.11.32] | (RefSeq) codeine O-demethylase	[QR]	--	2OG-Fe(II) oxygenase superfamily	Codeine O-demethylase OS=Papaver somniferum OX=3469 GN=CODM PE=1 SV=1	Ethylene-forming-enzyme-like dioxygenase OS=Solanum tuberosum OX=4113 GN=102588798 PE=3 SV=1	Q	Secondary metabolites biosynthesis, transport and catabolism	PREDICTED: codeine O-demethylase-like [Solanum tuberosum]
SMEL4.1_10g018660.1	--	--	Molecular Function: oxidoreductase activity (GO:0016491);; Molecular Function: metal ion binding (GO:0046872);	K02732|2.0e-18|bna:106432428|K02732 20S proteasome subunit beta 6 [EC:3.4.25.1] | (RefSeq) uncharacterized protein LOC106432428	[QR]	--	--	Gibberellin 20 oxidase 1-A OS=Triticum aestivum OX=4565 GN=GA20ox1A PE=2 SV=1	Ethylene-forming-enzyme-like dioxygenase OS=Solanum tuberosum OX=4113 PE=3 SV=1	Q	Secondary metabolites biosynthesis, transport and catabolism	PREDICTED: codeine O-demethylase-like [Solanum tuberosum]
SMEL4.1_10g018670.1	[DPM]	--	Molecular Function: copper ion binding (GO:0005507);; Biological Process: lignin catabolic process (GO:0046274);; Cellular Component: apoplast (GO:0048046);; Molecular Function: hydroquinone:oxygen oxidoreductase activity (GO:0052716);	K05909|0.0e+00|sot:102588474|K05909 laccase [EC:1.10.3.2] | (RefSeq) laccase-4-like	[Q]	Secondary metabolites biosynthesis, transport and catabolism	Multicopper oxidase	Laccase-4 OS=Arabidopsis thaliana OX=3702 GN=IRX12 PE=2 SV=2	Laccase OS=Solanum tuberosum OX=4113 GN=102588474 PE=3 SV=1	Q	Secondary metabolites biosynthesis, transport and catabolism	PREDICTED: laccase-4-like [Solanum tuberosum]
SMEL4.1_10g018680.1	--	--	Molecular Function: DNA binding (GO:0003677);; Cellular Component: nucleus (GO:0005634);	K08869|7.2e-25|cre:CHLREDRAFT_165812|K08869 aarF domain-containing kinase | (RefSeq) predicted protein	[O]	Posttranslational modification, protein turnover, chaperones	Myb-like DNA-binding domain	Transcription factor DIVARICATA OS=Antirrhinum majus OX=4151 GN=DIVARICATA PE=2 SV=1	DIV3B protein OS=Solanum tuberosum OX=4113 GN=102588148 PE=4 SV=1	K	Transcription	PREDICTED: transcription factor DIVARICATA-like [Solanum tuberosum]
SMEL4.1_10g018690.1	--	--	Biological Process: amino acid transmembrane transport (GO:0003333);; Cellular Component: plasma membrane (GO:0005886);; Molecular Function: amino acid transmembrane transporter activity (GO:0015171);; Cellular Component: integral component of membrane (GO:0016021);	K13946|6.7e-276|sly:100736479|K13946 auxin influx carrier (AUX1 LAX family) | (RefSeq) LAX4 protein	[E]	Amino acid transport and metabolism	Transmembrane amino acid transporter protein	Auxin transporter-like protein 2 OS=Medicago truncatula OX=3880 GN=LAX2 PE=2 SV=1	LAX4 protein OS=Solanum lycopersicum OX=4081 GN=100736479 PE=2 SV=1	E	Amino acid transport and metabolism	auxin transporter-like protein 4 [Solanum lycopersicum]
SMEL4.1_10g018700.1	[M]	Cell wall/membrane/envelope biogenesis	Cellular Component: integral component of membrane (GO:0016021);	K01988|1.2e-179|sot:102584175|K01988 lactosylceramide 4-alpha-galactosyltransferase [EC:2.4.1.228] | (RefSeq) lactosylceramide 4-alpha-galactosyltransferase-like	[G]	Carbohydrate transport and metabolism	Alpha 1,4-glycosyltransferase conserved region	Uncharacterized protein At4g19900 OS=Arabidopsis thaliana OX=3702 GN=At4g19900 PE=2 SV=1	Lactosylceramide 4-alpha-galactosyltransferase OS=Solanum tuberosum OX=4113 GN=102584175 PE=4 SV=1	G	Carbohydrate transport and metabolism	PREDICTED: lactosylceramide 4-alpha-galactosyltransferase-like [Solanum tuberosum]
SMEL4.1_10g018710.1	--	--	Molecular Function: DNA binding (GO:0003677);; Cellular Component: nucleus (GO:0005634);; Molecular Function: protein dimerization activity (GO:0046983);	K12412|5.7e-27|nta:107791588|K12412 pheromone receptor transcription factor | (RefSeq) agamous-like MADS-box protein AGL62	[K]	Transcription	SRF-type transcription factor (DNA-binding and dimerisation domain)	Agamous-like MADS-box protein AGL61 OS=Arabidopsis thaliana OX=3702 GN=AGL61 PE=1 SV=1	Mads box protein OS=Solanum tuberosum OX=4113 PE=4 SV=1	K	Transcription	PREDICTED: agamous-like MADS-box protein AGL61 [Solanum tuberosum]
SMEL4.1_10g018720.1	--	--	Molecular Function: nucleic acid binding (GO:0003676);; Molecular Function: RNA-DNA hybrid ribonuclease activity (GO:0004523);	--	--	--	--	--	RNase H family protein OS=Solanum tuberosum OX=4113 PE=4 SV=1	S	Function unknown	hypothetical protein FXO37_18018 [Capsicum annuum]
SMEL4.1_10g018730.1	--	--	--	--	--	--	--	--	Uncharacterized protein OS=Capsicum baccatum OX=33114 GN=CQW23_25951 PE=4 SV=1	--	--	hypothetical protein CQW23_25951 [Capsicum baccatum]
SMEL4.1_10g018740.1	--	--	--	--	--	--	--	--	Uncharacterized protein OS=Capsicum baccatum OX=33114 GN=CQW23_25951 PE=4 SV=1	--	--	hypothetical protein EJD97_025590 [Solanum chilense]
SMEL4.1_10g018750.1	[T]	Signal transduction mechanisms	Molecular Function: protein serine/threonine kinase activity (GO:0004674);; Molecular Function: ATP binding (GO:0005524);	K13416|1.6e-63|cpep:111793907|K13416 brassinosteroid insensitive 1-associated receptor kinase 1 [EC:2.7.10.1 2.7.11.1] | (RefSeq) BRASSINOSTEROID INSENSITIVE 1-associated receptor kinase 1-like	[T]	Signal transduction mechanisms	Protein tyrosine and serine/threonine kinase	Cold-responsive protein kinase 1 OS=Arabidopsis thaliana OX=3702 GN=CRPK1 PE=1 SV=1	Protein kinase domain-containing protein OS=Solanum lycopersicum OX=4081 PE=3 SV=1	T	Signal transduction mechanisms	putative serine/threonine-protein kinase isoform X1 [Solanum lycopersicum]
SMEL4.1_10g018760.1	--	--	Molecular Function: metal ion binding (GO:0046872);	--	[R]	General function prediction only	Yippee zinc-binding/DNA-binding /Mis18, centromere assembly	Protein yippee-like OS=Solanum tuberosum OX=4113 PE=2 SV=1	Protein yippee-like OS=Solanum lycopersicum OX=4081 GN=101250064 PE=3 SV=1	S	Function unknown	protein yippee-like [Solanum lycopersicum]
SMEL4.1_10g018770.1	--	--	--	K23978|2.9e-39|sot:102584408|K23978 isoamyl acetate esterase [EC:3.1.1.112] | (RefSeq) GDSL esterase/lipase CPRD49-like	[I]	Lipid transport and metabolism	GDSL-like Lipase/Acylhydrolase family	GDSL esterase/lipase CPRD49 OS=Arabidopsis thaliana OX=3702 GN=CPRD49 PE=2 SV=1	Isoamyl acetate-hydrolyzing esterase OS=Solanum tuberosum OX=4113 GN=102584408 PE=4 SV=1	I	Lipid transport and metabolism	PREDICTED: GDSL esterase/lipase CPRD49-like [Solanum tuberosum]
SMEL4.1_10g018780.1	--	--	Molecular Function: hydrolase activity, acting on ester bonds (GO:0016788);	K23978|1.8e-26|spen:107032392|K23978 isoamyl acetate esterase [EC:3.1.1.112] | (RefSeq) GDSL esterase/lipase CPRD49-like isoform X1	[I]	Lipid transport and metabolism	--	GDSL esterase/lipase CPRD49 OS=Arabidopsis thaliana OX=3702 GN=CPRD49 PE=2 SV=1	Lipase_GDSL domain-containing protein OS=Solanum lycopersicum OX=4081 PE=3 SV=1	I	Lipid transport and metabolism	hypothetical protein EJD97_006065 [Solanum chilense]
SMEL4.1_10g018790.1	--	--	Molecular Function: enzyme inhibitor activity (GO:0004857);	K01051|3.2e-12|psom:113326574|K01051 pectinesterase [EC:3.1.1.11] | (RefSeq) pectinesterase-like	--	--	Plant invertase/pectin methylesterase inhibitor	Pectinesterase inhibitor 7 OS=Arabidopsis thaliana OX=3702 GN=PMEI7 PE=2 SV=1	PMEI domain-containing protein OS=Capsicum chinense OX=80379 GN=BC332_25871 PE=4 SV=1	S	Function unknown	hypothetical protein BC332_25871 [Capsicum chinense]
SMEL4.1_10g018800.1	--	--	--	--	--	--	--	--	Uncharacterized protein OS=Solanum lycopersicum OX=4081 PE=4 SV=1	--	--	putative glycine-rich cell wall structural protein 1 [Solanum pennellii]
SMEL4.1_10g018810.1	--	--	Molecular Function: phosphatidylinositol phospholipase C activity (GO:0004435);; Biological Process: lipid catabolic process (GO:0016042);; Biological Process: intracellular signal transduction (GO:0035556);	K05857|4.4e-226|sot:102583742|K05857 phosphatidylinositol phospholipase C, delta [EC:3.1.4.11] | (RefSeq) PLC1; phosphoinositide phospholipase C 2-like	[T]	Signal transduction mechanisms	Phosphatidylinositol-specific phospholipase C, X domain	Phosphoinositide phospholipase C 2 OS=Arabidopsis thaliana OX=3702 GN=PLC2 PE=1 SV=1	Phosphoinositide phospholipase C OS=Solanum tuberosum OX=4113 GN=PLC1 PE=2 SV=1	I	Lipid transport and metabolism	phosphoinositide phospholipase C 2-like [Solanum tuberosum]
SMEL4.1_10g018820.1	[TK]	--	Molecular Function: protein kinase activity (GO:0004672);; Molecular Function: calcium ion binding (GO:0005509);; Molecular Function: ATP binding (GO:0005524);	K13412|4.8e-128|sot:102580083|K13412 calcium-dependent protein kinase [EC:2.7.11.1] | (RefSeq) calcium-dependent protein kinase 2-like	[T]	Signal transduction mechanisms	Protein kinase domain	Calcium-dependent protein kinase 21 OS=Arabidopsis thaliana OX=3702 GN=CPK21 PE=1 SV=1	Calcium-dependent protein kinase 21 OS=Capsicum baccatum OX=33114 GN=CQW23_03258 PE=4 SV=1	T	Signal transduction mechanisms	PREDICTED: calcium-dependent protein kinase 2-like [Solanum tuberosum]
SMEL4.1_10g018830.1	--	--	--	K13993|1.9e-16|cann:107844800|K13993 HSP20 family protein | (RefSeq) 18.1 kDa class I heat shock protein-like	--	--	--	18.1 kDa class I heat shock protein OS=Pisum sativum OX=3888 GN=HSP18.1 PE=1 SV=1	SHSP domain-containing protein (Fragment) OS=Capsicum baccatum OX=33114 GN=CQW23_23990 PE=3 SV=1	O	Posttranslational modification, protein turnover, chaperones	hypothetical protein CQW23_23990, partial [Capsicum baccatum]
SMEL4.1_10g018840.1	--	--	--	--	--	--	--	--	Putative ovule protein OS=Solanum chacoense OX=4108 PE=4 SV=1	S	Function unknown	PREDICTED: uncharacterized protein LOC102593680 isoform X1 [Solanum tuberosum]
SMEL4.1_10g018850.1	--	--	Molecular Function: Rho guanyl-nucleotide exchange factor activity (GO:0005089);	--	--	--	PRONE (Plant-specific Rop nucleotide exchanger)	Rop guanine nucleotide exchange factor 7 OS=Arabidopsis thaliana OX=3702 GN=ROPGEF7 PE=1 SV=1	Rop guanine nucleotide exchange factor OS=Solanum tuberosum OX=4113 GN=102594227 PE=4 SV=1	G	Carbohydrate transport and metabolism	PREDICTED: rop guanine nucleotide exchange factor 7-like [Solanum tuberosum]
SMEL4.1_10g018860.1	--	--	Cellular Component: integral component of membrane (GO:0016021);	--	--	--	--	--	Uncharacterized protein OS=Solanum tuberosum OX=4113 PE=4 SV=1	--	--	hypothetical protein A4A49_24387 [Nicotiana attenuata]
SMEL4.1_10g018870.1	[J]	Translation, ribosomal structure and biogenesis	Molecular Function: RNA binding (GO:0003723);; Cellular Component: nucleolus (GO:0005730);; Biological Process: ribosome biogenesis (GO:0042254);; Cellular Component: ribonucleoprotein complex (GO:1990904);	K12845|2.2e-64|cann:107845965|K12845 U4/U6 small nuclear ribonucleoprotein SNU13 | (RefSeq) NHP2-like protein 1	[AJ]	--	Ribosomal protein L7Ae/L30e/S12e/Gadd45 family	--	Ribonucloprotein OS=Capsicum annuum OX=4072 GN=LOC107845965 PE=3 SV=1	--	--	PREDICTED: NHP2-like protein 1 [Capsicum annuum]
SMEL4.1_10g018880.1	[M]	Cell wall/membrane/envelope biogenesis	--	--	--	--	Glyoxal oxidase N-terminus	Aldehyde oxidase GLOX OS=Vitis pseudoreticulata OX=231512 GN=GLOX PE=2 SV=1	Glyoxal oxidase OS=Solanum tuberosum OX=4113 GN=102594566 PE=4 SV=1	S	Function unknown	PREDICTED: galactose oxidase [Solanum tuberosum]
SMEL4.1_10g018890.1	--	--	--	K08596|2.5e-27|nau:109213265|K08596 sentrin-specific protease 7 [EC:3.4.22.68] | (RefSeq) probable ubiquitin-like-specific protease 2B	--	--	Domain of unknown function (DUF4283)	--	Putative ovule protein (Fragment) OS=Solanum chacoense OX=4108 PE=4 SV=1	--	--	hypothetical protein A4A49_09858, partial [Nicotiana attenuata]
SMEL4.1_10g018900.1	--	--	Molecular Function: DNA binding (GO:0003677);; Cellular Component: nucleus (GO:0005634);; Molecular Function: protein dimerization activity (GO:0046983);	K12412|2.9e-25|cann:107841679|K12412 pheromone receptor transcription factor | (RefSeq) agamous-like MADS-box protein AGL29	[K]	Transcription	SRF-type transcription factor (DNA-binding and dimerisation domain)	Agamous-like MADS-box protein AGL61 OS=Arabidopsis thaliana OX=3702 GN=AGL61 PE=1 SV=1	Mads box protein OS=Solanum tuberosum OX=4113 GN=107058123 PE=4 SV=1	K	Transcription	hypothetical protein EJD97_021858 [Solanum chilense]
SMEL4.1_10g018910.1	--	--	Molecular Function: DNA binding (GO:0003677);; Cellular Component: nucleus (GO:0005634);; Biological Process: regulation of transcription, DNA-templated (GO:0006355);	--	[K]	Transcription	Associated with HOX	BEL1-like homeodomain protein 9 OS=Arabidopsis thaliana OX=3702 GN=BLH9 PE=1 SV=1	Bel1 homeotic protein OS=Solanum tuberosum OX=4113 GN=102594888 PE=3 SV=1	K	Transcription	PREDICTED: BEL1-like homeodomain protein 9 [Solanum tuberosum]
SMEL4.1_10g018920.1	--	--	Cellular Component: plasma membrane (GO:0005886);; Cellular Component: integral component of membrane (GO:0016021);	--	--	--	Domain of unknown function (DUF588)	CASP-like protein 5B3 OS=Oryza sativa subsp. indica OX=39946 GN=OsI_30532 PE=3 SV=1	CASP-like protein OS=Capsicum annuum OX=4072 GN=LOC107846012 PE=3 SV=1	S	Function unknown	PREDICTED: CASP-like protein 5B2 [Capsicum annuum]
SMEL4.1_10g018940.1	--	--	--	--	--	--	--	--	Putative ovule protein OS=Solanum chacoense OX=4108 PE=4 SV=1	--	--	PREDICTED: uncharacterized protein LOC102595547 [Solanum tuberosum]
SMEL4.1_10g018950.1	[IQR]	--	Molecular Function: oxidoreductase activity (GO:0016491);	K08081|4.8e-141|sot:102595884|K08081 tropinone reductase I [EC:1.1.1.206] | (RefSeq) tropinone reductase homolog At5g06060-like	[R]	General function prediction only	Enoyl-(Acyl carrier protein) reductase	Tropinone reductase homolog OS=Datura stramonium OX=4076 PE=2 SV=1	Tropinone reductase OS=Solanum tuberosum OX=4113 GN=102595884 PE=4 SV=1	Q	Secondary metabolites biosynthesis, transport and catabolism	PREDICTED: tropinone reductase homolog At5g06060-like [Solanum tuberosum]
SMEL4.1_10g018960.1	--	--	Molecular Function: pectinesterase activity (GO:0030599);; Biological Process: cell wall modification (GO:0042545);; Molecular Function: aspartyl esterase activity (GO:0045330);	K01051|1.9e-25|sot:102593166|K01051 pectinesterase [EC:3.1.1.11] | (RefSeq) pectinesterase-like	--	--	Pectinesterase	Probable pectinesterase/pectinesterase inhibitor 25 OS=Arabidopsis thaliana OX=3702 GN=PME25 PE=2 SV=1	Pectinesterase OS=Solanum tuberosum OX=4113 GN=102593166 PE=4 SV=1	G	Carbohydrate transport and metabolism	PREDICTED: pectinesterase-like [Solanum tuberosum]
SMEL4.1_10g018980.1	--	--	--	--	--	--	Domain of unknown function (DUF4283)	--	Putative ovule protein OS=Solanum chacoense OX=4108 PE=4 SV=1	E	Amino acid transport and metabolism	hypothetical protein FXO38_04149 [Capsicum annuum]
SMEL4.1_10g018990.1	[G]	Carbohydrate transport and metabolism	Molecular Function: ATP binding (GO:0005524);	--	[O]	Posttranslational modification, protein turnover, chaperones	ATPase family associated with various cellular activities (AAA)	Ribulose bisphosphate carboxylase/oxygenase activase, chloroplastic OS=Solanum pennellii OX=28526 PE=2 SV=1	Ribulose bisphosphate carboxylase/oxygenase activase 2, chloroplastic OS=Capsicum chinense OX=80379 GN=BC332_25889 PE=4 SV=1	O	Posttranslational modification, protein turnover, chaperones	Ribulose bisphosphate carboxylase/oxygenase activase 2, chloroplastic [Capsicum chinense]
SMEL4.1_10g019000.1	--	--	Cellular Component: integral component of membrane (GO:0016021);; Molecular Function: protein-cysteine S-palmitoyltransferase activity (GO:0019706);	K20029|2.9e-77|spen:107002255|K20029 palmitoyltransferase ZDHHC3/7/25 [EC:2.3.1.225] | (RefSeq) probable protein S-acyltransferase 16 isoform X1	[R]	General function prediction only	DHHC palmitoyltransferase	Probable protein S-acyltransferase 16 OS=Arabidopsis thaliana OX=3702 GN=PAT16 PE=2 SV=1	S-acyltransferase OS=Solanum chacoense OX=4108 PE=3 SV=1	S	Function unknown	probable protein S-acyltransferase 16 isoform X1 [Solanum pennellii]
SMEL4.1_10g019010.1	--	--	Biological Process: response to red or far red light (GO:0009639);; Cellular Component: integral component of membrane (GO:0016021);	K05909|1.2e-21|oeu:111404394|K05909 laccase [EC:1.10.3.2] | (RefSeq) laccase-4-like	--	--	--	Protein FAR-RED-ELONGATED HYPOCOTYL 1-LIKE OS=Arabidopsis thaliana OX=3702 GN=FHL PE=1 SV=1	Putative ovule protein OS=Solanum chacoense OX=4108 PE=4 SV=1	--	--	PREDICTED: uncharacterized protein LOC102597420 [Solanum tuberosum]
SMEL4.1_10g019020.1	--	--	Biological Process: regulation of DNA endoreduplication (GO:0032875);	K05909|1.6e-06|sly:101253711|K05909 laccase [EC:1.10.3.2] | (RefSeq) laccase-17	--	--	--	--	uncharacterized protein LOC104217576 OS=Nicotiana sylvestris OX=4096 GN=LOC104217576 PE=4 SV=1	--	--	PREDICTED: uncharacterized protein LOC104217576 [Nicotiana sylvestris]
SMEL4.1_10g019030.1	[O]	Posttranslational modification, protein turnover, chaperones	Molecular Function: metalloendopeptidase activity (GO:0004222);; Molecular Function: ATP binding (GO:0005524);; Molecular Function: zinc ion binding (GO:0008270);; Cellular Component: integral component of membrane (GO:0016021);	K08956|0.0e+00|spen:107002356|K08956 AFG3 family protein [EC:3.4.24.-] | (RefSeq) ATP-dependent zinc metalloprotease FTSH 10, mitochondrial-like isoform X1	[O]	Posttranslational modification, protein turnover, chaperones	Peptidase family M41	ATP-dependent zinc metalloprotease FTSH 8, mitochondrial OS=Oryza sativa subsp. japonica OX=39947 GN=FTSH8 PE=3 SV=1	Uncharacterized protein OS=Solanum lycopersicum OX=4081 PE=3 SV=1	O	Posttranslational modification, protein turnover, chaperones	ATP-dependent zinc metalloprotease FTSH 10, mitochondrial-like isoform X1 [Solanum pennellii]
SMEL4.1_10g019040.1	[O]	Posttranslational modification, protein turnover, chaperones	Molecular Function: metalloendopeptidase activity (GO:0004222);; Molecular Function: ATP binding (GO:0005524);; Molecular Function: zinc ion binding (GO:0008270);; Cellular Component: integral component of membrane (GO:0016021);	K08956|0.0e+00|sot:102598626|K08956 AFG3 family protein [EC:3.4.24.-] | (RefSeq) ATP-dependent zinc metalloprotease FTSH 8, mitochondrial-like	[O]	Posttranslational modification, protein turnover, chaperones	ATPase family associated with various cellular activities (AAA)	ATP-dependent zinc metalloprotease FTSH 8, mitochondrial OS=Oryza sativa subsp. japonica OX=39947 GN=FTSH8 PE=3 SV=1	Uncharacterized protein OS=Solanum lycopersicum OX=4081 PE=3 SV=1	O	Posttranslational modification, protein turnover, chaperones	hypothetical protein TanjilG_17208 [Lupinus angustifolius]
SMEL4.1_10g019050.1	--	--	Molecular Function: molecular_function (GO:0003674);; Molecular Function: nucleic acid binding (GO:0003676);; Molecular Function: DNA binding (GO:0003677);; Molecular Function: DNA-binding transcription factor activity (GO:0003700);; Molecular Function: binding (GO:0005488);; Cellular Component: cellular_component (GO:0005575);; Cellular Component: intracellular (GO:0005622);; Cellular Component:…	K14494|4.5e-45|ppp:112296036|K14494 DELLA protein | (RefSeq) DELLA protein GAI-like	--	--	GRAS domain family	Scarecrow-like protein 9 OS=Arabidopsis thaliana OX=3702 GN=SCL9 PE=2 SV=1	Scarecrow-like protein 9 OS=Capsicum baccatum OX=33114 GN=CQW23_24004 PE=3 SV=1	K	Transcription	PREDICTED: scarecrow-like protein 9 [Solanum tuberosum]
SMEL4.1_10g019060.1	--	--	Biological Process: defense response (GO:0006952);; Molecular Function: ADP binding (GO:0043531);	K13453|4.7e-46|nto:104110459|K13453 disease resistance protein | (RefSeq) late blight resistance protein R1-A-like isoform X1	[T]	Signal transduction mechanisms	NB-ARC domain	Putative late blight resistance protein homolog R1B-14 OS=Solanum demissum OX=50514 GN=R1B-14 PE=3 SV=1	Putative disease resistance protein OS=Solanum tuberosum OX=4113 PE=3 SV=1	T	Signal transduction mechanisms	RecName: Full=Putative late blight resistance protein homolog R1B-14 [Solanum demissum]
SMEL4.1_10g019070.1	--	--	--	K21596|3.8e-25|nta:107794376|K21596 calmodulin-binding transcription activator | (RefSeq) uncharacterized LOC107794376	--	--	--	F-box protein CPR1 OS=Arabidopsis thaliana OX=3702 GN=CPR1 PE=1 SV=2	F-box domain-containing protein OS=Solanum tuberosum OX=4113 GN=107058807 PE=4 SV=1	S	Function unknown	PREDICTED: F-box protein CPR30-like [Solanum tuberosum]
SMEL4.1_10g019080.1	--	--	Molecular Function: ATP binding (GO:0005524);	K08900|1.1e-32|cmo:103498027|K08900 mitochondrial chaperone BCS1 | (RefSeq) AAA-ATPase ASD, mitochondrial-like	[O]	Posttranslational modification, protein turnover, chaperones	Domain associated at C-terminal with AAA	AAA-ATPase ASD, mitochondrial OS=Arabidopsis thaliana OX=3702 GN=AATP1 PE=1 SV=1	Adenosinetriphosphatase OS=Solanum demissum OX=50514 GN=SDM1_47t00013 PE=3 SV=1	O	Posttranslational modification, protein turnover, chaperones	ATPase protein, putative [Solanum demissum]
SMEL4.1_10g019090.1	[J]	Translation, ribosomal structure and biogenesis	Molecular Function: structural constituent of ribosome (GO:0003735);; Biological Process: translation (GO:0006412);; Cellular Component: small ribosomal subunit (GO:0015935);; Molecular Function: rRNA binding (GO:0019843);	K02997|6.9e-102|sly:101253011|K02997 small subunit ribosomal protein S9e | (RefSeq) 40S ribosomal protein S9-2	[J]	Translation, ribosomal structure and biogenesis	S4 domain	40S ribosomal protein S9-2 OS=Arabidopsis thaliana OX=3702 GN=RPS9C PE=1 SV=1	S4 RNA-binding domain-containing protein OS=Capsicum baccatum OX=33114 GN=CQW23_01238 PE=3 SV=1	J	Translation, ribosomal structure and biogenesis	hypothetical protein CQW23_01238 [Capsicum baccatum]
SMEL4.1_10g019100.1	--	--	Biological Process: response to acid chemical (GO:0001101);; Molecular Function: catalase activity (GO:0004096);; Cellular Component: cellular_component (GO:0005575);; Cellular Component: intracellular (GO:0005622);; Cellular Component: obsolete cell (GO:0005623);; Cellular Component: cytoplasm (GO:0005737);; Cellular Component: vacuole (GO:0005773);; Cellular Component: vacuolar membrane (GO:000…	--	--	--	PLAT/LH2 domain	PLAT domain-containing protein 1 OS=Arabidopsis thaliana OX=3702 GN=PLAT1 PE=1 SV=1	uncharacterized protein LOC107845689 OS=Capsicum annuum OX=4072 GN=LOC107845689 PE=4 SV=1	S	Function unknown	putative lipoxygenase -like proteiny domain-containing protein 1-like [Capsicum annuum]
SMEL4.1_10g019110.1	[G]	Carbohydrate transport and metabolism	Molecular Function: ribulose-phosphate 3-epimerase activity (GO:0004750);; Biological Process: carbohydrate metabolic process (GO:0005975);; Biological Process: pentose-phosphate shunt (GO:0006098);; Molecular Function: metal ion binding (GO:0046872);	K01783|2.7e-63|spen:107018572|K01783 ribulose-phosphate 3-epimerase [EC:5.1.3.1] | (RefSeq) ribulose-phosphate 3-epimerase, cytoplasmic isoform-like	[G]	Carbohydrate transport and metabolism	Ribulose-phosphate 3 epimerase family	Ribulose-phosphate 3-epimerase, cytoplasmic isoform OS=Oryza sativa subsp. japonica OX=39947 GN=Os09g0505700 PE=1 SV=1	Ribulose-phosphate 3-epimerase OS=Solanum demissum OX=50514 GN=SDM1_52t00010 PE=3 SV=2	G	Carbohydrate transport and metabolism	Ribulose-phosphate 3-epimerase, cytoplasmic isoform, putative [Solanum demissum]
SMEL4.1_10g019120.1	--	--	Molecular Function: molecular_function (GO:0003674);; Molecular Function: nucleic acid binding (GO:0003676);; Molecular Function: RNA binding (GO:0003723);; Molecular Function: binding (GO:0005488);; Molecular Function: protein binding (GO:0005515);; Cellular Component: cellular_component (GO:0005575);; Cellular Component: intracellular (GO:0005622);; Cellular Component: obsolete cell (GO:0005623…	K14556|3.7e-263|sot:102603891|K14556 U3 small nucleolar RNA-associated protein 12 | (RefSeq) WD repeat-containing protein 3-like	[A]	RNA processing and modification	WD domain, G-beta repeat	--	WD-repeat protein OS=Solanum tuberosum OX=4113 GN=102603891 PE=4 SV=1	A	RNA processing and modification	PREDICTED: WD repeat-containing protein 3-like [Solanum tuberosum]
SMEL4.1_10g019130.1	--	--	Molecular Function: ATP binding (GO:0005524);	K08900|3.4e-24|zju:107415587|K08900 mitochondrial chaperone BCS1 | (RefSeq) AAA-ATPase At3g28580-like isoform X1	[O]	Posttranslational modification, protein turnover, chaperones	ATPase family associated with various cellular activities (AAA)	AAA-ATPase At3g28510 OS=Arabidopsis thaliana OX=3702 GN=At3g28510 PE=2 SV=1	Adenosinetriphosphatase OS=Solanum tuberosum OX=4113 GN=102580725 PE=3 SV=1	O	Posttranslational modification, protein turnover, chaperones	LOW QUALITY PROTEIN: AAA-ATPase At3g28580-like [Solanum pennellii]
SMEL4.1_10g019140.1	[J]	Translation, ribosomal structure and biogenesis	Molecular Function: structural constituent of ribosome (GO:0003735);; Biological Process: translation (GO:0006412);; Cellular Component: small ribosomal subunit (GO:0015935);; Molecular Function: rRNA binding (GO:0019843);	K02997|6.9e-102|sly:101253011|K02997 small subunit ribosomal protein S9e | (RefSeq) 40S ribosomal protein S9-2	[J]	Translation, ribosomal structure and biogenesis	S4 domain	40S ribosomal protein S9-2 OS=Arabidopsis thaliana OX=3702 GN=RPS9C PE=1 SV=1	S4 RNA-binding domain-containing protein OS=Capsicum baccatum OX=33114 GN=CQW23_01238 PE=3 SV=1	J	Translation, ribosomal structure and biogenesis	hypothetical protein CQW23_01238 [Capsicum baccatum]
SMEL4.1_10g019150.1	[J]	Translation, ribosomal structure and biogenesis	Molecular Function: structural constituent of ribosome (GO:0003735);; Biological Process: translation (GO:0006412);; Cellular Component: small ribosomal subunit (GO:0015935);; Molecular Function: rRNA binding (GO:0019843);; Cellular Component: cytosolic small ribosomal subunit (GO:0022627);; Biological Process: positive regulation of translational fidelity (GO:0045903);	K02997|6.9e-34|ccav:112523051|K02997 small subunit ribosomal protein S9e | (RefSeq) 40S ribosomal protein S9-2-like	[J]	Translation, ribosomal structure and biogenesis	--	40S ribosomal protein S9-1 OS=Arabidopsis thaliana OX=3702 GN=RPS9B PE=1 SV=1	Putative ribosomal protein S4/S9 OS=Helianthus annuus OX=4232 GN=HannXRQ_Chr12g0380701 PE=3 SV=1	J	Translation, ribosomal structure and biogenesis	40S ribosomal protein S9-2 [Helianthus annuus]
SMEL4.1_10g019160.1	[G]	Carbohydrate transport and metabolism	Molecular Function: ribulose-phosphate 3-epimerase activity (GO:0004750);; Biological Process: carbohydrate metabolic process (GO:0005975);; Biological Process: pentose-phosphate shunt (GO:0006098);; Molecular Function: metal ion binding (GO:0046872);	K01783|2.2e-82|spen:107018572|K01783 ribulose-phosphate 3-epimerase [EC:5.1.3.1] | (RefSeq) ribulose-phosphate 3-epimerase, cytoplasmic isoform-like	[G]	Carbohydrate transport and metabolism	Ribulose-phosphate 3 epimerase family	Ribulose-phosphate 3-epimerase, cytoplasmic isoform OS=Oryza sativa subsp. japonica OX=39947 GN=Os09g0505700 PE=1 SV=1	Ribulose-phosphate 3-epimerase OS=Solanum demissum OX=50514 GN=SDM1_52t00010 PE=3 SV=2	G	Carbohydrate transport and metabolism	Ribulose-phosphate 3-epimerase, cytoplasmic isoform, putative [Solanum demissum]
SMEL4.1_10g019170.1	--	--	Molecular Function: nucleic acid binding (GO:0003676);; Molecular Function: RNA-DNA hybrid ribonuclease activity (GO:0004523);	--	--	--	--	--	uncharacterized protein LOC107806563 OS=Nicotiana tabacum OX=4097 GN=LOC107806563 PE=4 SV=1	S	Function unknown	PREDICTED: uncharacterized protein LOC107806563 [Nicotiana tabacum]
SMEL4.1_10g019180.1	--	--	Molecular Function: DNA binding (GO:0003677);; Cellular Component: nucleus (GO:0005634);	K09422|1.0e-109|sly:101250648|K09422 transcription factor MYB, plant | (RefSeq) transcription factor MYB113	[K]	Transcription	Myb-like DNA-binding domain	Transcription factor MYB1 OS=Actinidia chinensis var. chinensis OX=1590841 GN=MYB1 PE=2 SV=1	Anthocyanin R2R3-MYB transcription factor OS=Solanum melongena OX=4111 GN=MYB PE=2 SV=1	K	Transcription	MYB transcription factor [Solanum melongena]
SMEL4.1_10g019190.1	[R]	General function prediction only	Molecular Function: ATP binding (GO:0005524);; Molecular Function: 1-phosphatidylinositol-4-phosphate 5-kinase activity (GO:0016308);	K00889|0.0e+00|sly:101250943|K00889 1-phosphatidylinositol-4-phosphate 5-kinase [EC:2.7.1.68] | (RefSeq) phosphatidylinositol 4-phosphate 5-kinase 9-like isoform X1	[T]	Signal transduction mechanisms	Phosphatidylinositol-4-phosphate 5-Kinase	Phosphatidylinositol 4-phosphate 5-kinase 9 OS=Arabidopsis thaliana OX=3702 GN=PIP5K9 PE=1 SV=2	1-phosphatidylinositol-4-phosphate 5-kinase OS=Capsicum chinense OX=80379 GN=BC332_25947 PE=4 SV=1	T	Signal transduction mechanisms	phosphatidylinositol 4-phosphate 5-kinase 9-like isoform X1 [Solanum lycopersicum]
SMEL4.1_10g019200.1	[J]	Translation, ribosomal structure and biogenesis	Molecular Function: structural constituent of ribosome (GO:0003735);; Cellular Component: ribosome (GO:0005840);; Biological Process: translation (GO:0006412);	K02893|4.0e-73|sly:101247574|K02893 large subunit ribosomal protein L23Ae | (RefSeq) 60S ribosomal protein L23a-like	[J]	Translation, ribosomal structure and biogenesis	Ribosomal protein L23, N-terminal domain	60S ribosomal protein L23a OS=Nicotiana tabacum OX=4097 GN=RPL23A PE=2 SV=1	Ribosomal_L23eN domain-containing protein OS=Solanum lycopersicum OX=4081 GN=101247574 PE=3 SV=1	J	Translation, ribosomal structure and biogenesis	60S ribosomal protein L23a-like [Solanum lycopersicum]
SMEL4.1_10g019210.1	--	--	Molecular Function: microtubule motor activity (GO:0003777);; Molecular Function: ATP binding (GO:0005524);; Biological Process: microtubule-based movement (GO:0007018);; Molecular Function: microtubule binding (GO:0008017);	K10398|0.0e+00|sot:102606212|K10398 kinesin family member 11 | (RefSeq) probable 125 kDa kinesin-related protein	[Z]	Cytoskeleton	Kinesin motor domain	Kinesin-like protein KIN-5B OS=Arabidopsis thaliana OX=3702 GN=KIN5B PE=2 SV=1	Bipolar kinesin KRP-130 OS=Solanum tuberosum OX=4113 GN=102606212 PE=3 SV=1	Z	Cytoskeleton	PREDICTED: probable 125 kDa kinesin-related protein [Solanum tuberosum]
SMEL4.1_10g019220.1	[R]	General function prediction only	Molecular Function: GTPase activity (GO:0003924);; Molecular Function: GTP binding (GO:0005525);; Cellular Component: plasma membrane (GO:0005886);; Biological Process: intracellular protein transport (GO:0006886);; Biological Process: vesicle docking involved in exocytosis (GO:0006904);; Biological Process: protein secretion (GO:0009306);; Cellular Component: endomembrane system (GO:0012505);; B…	K07901|7.8e-115|nta:107828736|K07901 Ras-related protein Rab-8A | (RefSeq) ras-related protein RABE1a-like	[TU]	--	Ras family	Ras-related protein RABE1c OS=Arabidopsis thaliana OX=3702 GN=RABE1C PE=1 SV=1	Ras-related protein RAB8-1 OS=Nicotiana tabacum OX=4097 GN=Rab8-1 PE=2 SV=1	U	Intracellular trafficking, secretion, and vesicular transport	ras-related protein RABE1a-like [Nicotiana tomentosiformis]
SMEL4.1_10g019240.1	--	--	--	--	--	--	--	--	BRI1-KD interacting protein 130 OS=Solanum tuberosum OX=4113 GN=102604964 PE=4 SV=1	--	--	PREDICTED: uncharacterized protein LOC102604964 isoform X1 [Solanum tuberosum]
SMEL4.1_10g019250.1	--	--	Biological Process: response to acid chemical (GO:0001101);; Molecular Function: molecular_function (GO:0003674);; Molecular Function: nucleic acid binding (GO:0003676);; Molecular Function: DNA binding (GO:0003677);; Molecular Function: DNA-binding transcription factor activity (GO:0003700);; Molecular Function: binding (GO:0005488);; Cellular Component: cellular_component (GO:0005575);; Cellula…	K14494|1.4e-131|sly:101265384|K14494 DELLA protein | (RefSeq) DELLA protein GAI	--	--	GRAS domain family	DELLA protein GAI OS=Solanum lycopersicum OX=4081 GN=GAI PE=2 SV=1	Uncharacterized protein OS=Solanum lycopersicum OX=4081 PE=3 SV=1	K	Transcription	DELLA protein GAI [Solanum lycopersicum]
SMEL4.1_10g019260.1	--	--	--	--	--	--	--	--	Uncharacterized protein OS=Solanum tuberosum OX=4113 GN=102606317 PE=4 SV=1	S	Function unknown	hypothetical protein CQW23_17022 [Capsicum baccatum]
SMEL4.1_10g019270.1	[IQR]	--	--	K19329|8.9e-99|tcc:18606538|K19329 WW domain-containing oxidoreductase | (RefSeq) short-chain dehydrogenase TIC 32, chloroplastic	[Q]	Secondary metabolites biosynthesis, transport and catabolism	short chain dehydrogenase	Short-chain dehydrogenase TIC 32 B, chloroplastic OS=Brassica napus OX=3708 GN=TIC32B PE=3 SV=1	Short-chain dehydrogenase OS=Solanum tuberosum OX=4113 GN=102604299 PE=3 SV=1	Q	Secondary metabolites biosynthesis, transport and catabolism	PREDICTED: short-chain dehydrogenase TIC 32, chloroplastic-like [Solanum tuberosum]
SMEL4.1_10g019280.1	[J]	Translation, ribosomal structure and biogenesis	Molecular Function: RNA binding (GO:0003723);	K12881|2.0e-84|sot:102603961|K12881 THO complex subunit 4 | (RefSeq) THO complex subunit 4A-like	[A]	RNA processing and modification	RNA recognition motif. (a.k.a. RRM, RBD, or RNP domain)	THO complex subunit 4A OS=Arabidopsis thaliana OX=3702 GN=ALY1 PE=1 SV=1	ALY protein OS=Solanum tuberosum OX=4113 PE=4 SV=1	A	RNA processing and modification	PREDICTED: THO complex subunit 4A-like [Solanum tuberosum]
SMEL4.1_10g019290.1	[O]	Posttranslational modification, protein turnover, chaperones	Molecular Function: ATP binding (GO:0005524);	K03283|0.0e+00|sot:102603624|K03283 heat shock 70kDa protein 1/2/6/8 | (RefSeq) hsp70; heat shock cognate 70 kDa protein 2	[O]	Posttranslational modification, protein turnover, chaperones	Hsp70 protein	Heat shock cognate 70 kDa protein 2 OS=Solanum lycopersicum OX=4081 GN=HSC-2 PE=2 SV=1	Heat shock cognate 70 kDa protein 2-like protein OS=Solanum melongena OX=4111 PE=3 SV=1	O	Posttranslational modification, protein turnover, chaperones	heat shock cognate 70 kDa protein 2-like protein [Solanum melongena]
SMEL4.1_10g019300.1	--	--	--	--	--	--	--	--	SLT1 protein OS=Solanum tuberosum OX=4113 GN=102603286 PE=4 SV=1	U	Intracellular trafficking, secretion, and vesicular transport	PREDICTED: uncharacterized protein LOC102603286 [Solanum tuberosum]
SMEL4.1_10g019310.1	--	--	Molecular Function: protein binding (GO:0005515);	K20241|0.0e+00|sot:102602947|K20241 WD repeat-containing protein 44 | (RefSeq) WD repeat-containing protein 44-like	[S]	Function unknown	WD domain, G-beta repeat	--	Uncharacterized protein OS=Solanum lycopersicum OX=4081 PE=4 SV=1	S	Function unknown	PREDICTED: WD repeat-containing protein 44-like [Solanum tuberosum]
SMEL4.1_10g019320.1	--	--	--	K02069|3.1e-26|cann:107843368|K02069 putative ABC transport system permease protein | (RefSeq) protein ALUMINUM SENSITIVE 3-like	--	--	--	--	uncharacterized protein LOC107817522 OS=Nicotiana tabacum OX=4097 GN=LOC107817522 PE=4 SV=1	S	Function unknown	uncharacterized protein LOC107019413 [Solanum pennellii]
SMEL4.1_10g019330.1	--	--	Molecular Function: DNA binding (GO:0003677);; Cellular Component: nucleus (GO:0005634);; Biological Process: regulation of transcription, DNA-templated (GO:0006355);	K20043|4.6e-22|aip:107640400|K20043 clathrin coat assembly protein AP180 | (RefSeq) putative clathrin assembly protein At5g35200	--	--	Dof domain, zinc finger	Dof zinc finger protein DOF5.1 OS=Arabidopsis thaliana OX=3702 GN=DOF5.1 PE=2 SV=1	dof zinc finger protein DOF2.4-like OS=Capsicum annuum OX=4072 GN=LOC107844884 PE=4 SV=1	B	Chromatin structure and dynamics	PREDICTED: dof zinc finger protein DOF2.4-like [Capsicum annuum]
SMEL4.1_10g019340.1	--	--	Biological Process: regulation of DNA endoreduplication (GO:0032875);	--	--	--	--	--	Uncharacterized protein OS=Solanum tuberosum OX=4113 PE=4 SV=1	S	Function unknown	cyclin-dependent protein kinase inhibitor SMR3-like [Solanum pennellii]
SMEL4.1_10g019350.1	[Z]	Cytoskeleton	Molecular Function: ATP binding (GO:0005524);; Cellular Component: cytoplasm (GO:0005737);; Cellular Component: cytoskeleton (GO:0005856);	K10355|2.5e-217|sly:101255046|K10355 actin, other eukaryote | (RefSeq) actin-75	[Z]	Cytoskeleton	Actin	Actin OS=Nicotiana tabacum OX=4097 PE=3 SV=1	Uncharacterized protein OS=Solanum lycopersicum OX=4081 GN=101255046 PE=3 SV=1	Z	Cytoskeleton	actin-75 [Solanum lycopersicum]
SMEL4.1_10g019360.1	--	--	--	K20523|6.5e-12|nta:107802414|K20523 SH3 domain-containing YSC84-like protein 1 | (RefSeq) uncharacterized LOC107802414	--	--	Domain of unknown function (DUF4283)	--	Putative ovule protein (Fragment) OS=Solanum chacoense OX=4108 PE=4 SV=1	--	--	hypothetical protein FXO37_35135 [Capsicum annuum]
SMEL4.1_10g019370.1	--	--	Cellular Component: extracellular region (GO:0005576);; Cellular Component: cell wall (GO:0005618);; Cellular Component: integral component of membrane (GO:0016021);; Molecular Function: hydrolase activity (GO:0016787);; Biological Process: cell wall organization (GO:0071555);	K01280|5.0e-62|spen:107013676|K01280 tripeptidyl-peptidase II [EC:3.4.14.10] | (RefSeq) tripeptidyl-peptidase 2-like isoform X1	[M]	Cell wall/membrane/envelope biogenesis	Pectinacetylesterase	Pectin acetylesterase 5 OS=Arabidopsis thaliana OX=3702 GN=PAE5 PE=2 SV=1	Pectin acetylesterase (Fragment) OS=Solanum chacoense OX=4108 PE=3 SV=1	M	Cell wall/membrane/envelope biogenesis	PREDICTED: pectin acetylesterase 5-like [Solanum tuberosum]
SMEL4.1_10g019380.1	--	--	Cellular Component: extracellular region (GO:0005576);; Cellular Component: cell wall (GO:0005618);; Molecular Function: hydrolase activity (GO:0016787);; Biological Process: cell wall organization (GO:0071555);	K01280|1.2e-43|spen:107013676|K01280 tripeptidyl-peptidase II [EC:3.4.14.10] | (RefSeq) tripeptidyl-peptidase 2-like isoform X1	[M]	Cell wall/membrane/envelope biogenesis	Pectinacetylesterase	Pectin acetylesterase 5 OS=Arabidopsis thaliana OX=3702 GN=PAE5 PE=2 SV=1	Pectin acetylesterase (Fragment) OS=Solanum chacoense OX=4108 PE=3 SV=1	M	Cell wall/membrane/envelope biogenesis	PREDICTED: pectin acetylesterase 5-like [Solanum tuberosum]
SMEL4.1_10g019390.1	--	--	Molecular Function: protein serine/threonine phosphatase activity (GO:0004722);	K01102|1.5e-123|gmx:100804061|K01102 pyruvate dehydrogenase phosphatase [EC:3.1.3.43] | (RefSeq) probable protein phosphatase 2C 4	[T]	Signal transduction mechanisms	Protein phosphatase 2C	Probable protein phosphatase 2C 4 OS=Arabidopsis thaliana OX=3702 GN=PLL5 PE=2 SV=1	PPM-type phosphatase domain-containing protein OS=Capsicum chinense OX=80379 GN=BC332_25913 PE=4 SV=1	T	Signal transduction mechanisms	hypothetical protein EJD97_024704 [Solanum chilense]
SMEL4.1_10g019400.1	--	--	Molecular Function: 3-oxo-5-alpha-steroid 4-dehydrogenase activity (GO:0003865);; Cellular Component: integral component of membrane (GO:0016021);; Biological Process: brassinosteroid biosynthetic process (GO:0016132);; Molecular Function: cholestenone 5-alpha-reductase activity (GO:0047751);	K09591|1.3e-129|spen:107032190|K09591 steroid 5-alpha-reductase [EC:1.3.1.22] | (RefSeq) steroid 5-alpha-reductase DET2	[I]	Lipid transport and metabolism	3-oxo-5-alpha-steroid 4-dehydrogenase	Steroid 5-alpha-reductase DET2 OS=Solanum lycopersicum OX=4081 GN=DET2 PE=1 SV=1	Steroid 5-alpha-reductase DET2 OS=Solanum chacoense OX=4108 GN=DET2 PE=2 SV=1	I	Lipid transport and metabolism	steroid 5-alpha-reductase DET2 [Solanum pennellii]
SMEL4.1_10g019410.1	--	--	Cellular Component: mitochondrion (GO:0005739);; Biological Process: protein transport (GO:0015031);; Molecular Function: metal ion binding (GO:0046872);	K17777|1.1e-46|nau:109210404|K17777 mitochondrial import inner membrane translocase subunit TIM9 | (RefSeq) mitochondrial import inner membrane translocase subunit Tim9	[U]	Intracellular trafficking, secretion, and vesicular transport	Tim10/DDP family zinc finger	Mitochondrial import inner membrane translocase subunit Tim9 OS=Oryza sativa subsp. japonica OX=39947 GN=TIM9 PE=3 SV=2	mitochondrial import inner membrane translocase subunit Tim9 OS=Nicotiana tabacum OX=4097 GN=LOC107787189 PE=4 SV=1	U	Intracellular trafficking, secretion, and vesicular transport	mitochondrial import inner membrane translocase subunit Tim9 [Nicotiana tomentosiformis]
SMEL4.1_10g019420.1	--	--	Cellular Component: extracellular region (GO:0005576);; Cellular Component: cell wall (GO:0005618);; Biological Process: plant-type cell wall organization (GO:0009664);; Cellular Component: membrane (GO:0016020);	K20628|1.4e-97|cqi:110704464|K20628 expansin | (RefSeq) expansin-A8-like	--	--	Expansin C-terminal domain	Expansin-A3 OS=Arabidopsis thaliana OX=3702 GN=EXPA3 PE=2 SV=1	Expansin OS=Solanum lycopersicum OX=4081 PE=3 SV=1	S	Function unknown	expansin precursor [Solanum lycopersicum]
SMEL4.1_10g019430.1	--	--	--	--	--	--	--	--	Uncharacterized protein OS=Solanum lycopersicum OX=4081 PE=4 SV=1	--	--	hypothetical protein EJD97_010610 [Solanum chilense]
SMEL4.1_10g019440.1	--	--	Molecular Function: ATP binding (GO:0005524);; Cellular Component: integral component of membrane (GO:0016021);	K08900|2.4e-69|vvi:100252443|K08900 mitochondrial chaperone BCS1 | (RefSeq) AAA-ATPase ASD, mitochondrial	[O]	Posttranslational modification, protein turnover, chaperones	Domain associated at C-terminal with AAA	AAA-ATPase ASD, mitochondrial OS=Arabidopsis thaliana OX=3702 GN=AATP1 PE=1 SV=1	Adenosinetriphosphatase OS=Solanum tuberosum OX=4113 PE=3 SV=1	O	Posttranslational modification, protein turnover, chaperones	LOW QUALITY PROTEIN: AAA-ATPase At3g28580-like [Solanum pennellii]
SMEL4.1_10g019450.1	--	--	--	K11649|2.0e-24|mtr:MTR_6g053260|K11649 SWI/SNF related-matrix-associated actin-dependent regulator of chromatin subfamily C | (RefSeq) F-box and associated interaction domain protein	--	--	--	Putative late blight resistance protein homolog R1A-3 OS=Solanum demissum OX=50514 GN=R1A-3 PE=5 SV=2	F-box domain-containing protein OS=Capsicum baccatum OX=33114 GN=CQW23_00172 PE=4 SV=1	S	Function unknown	hypothetical protein CQW23_00172 [Capsicum baccatum]
SMEL4.1_10g019460.1	--	--	Molecular Function: molecular_function (GO:0003674);; Molecular Function: nucleic acid binding (GO:0003676);; Molecular Function: RNA binding (GO:0003723);; Molecular Function: binding (GO:0005488);; Molecular Function: protein binding (GO:0005515);; Cellular Component: cellular_component (GO:0005575);; Cellular Component: intracellular (GO:0005622);; Cellular Component: obsolete cell (GO:0005623…	K14556|0.0e+00|sot:102603891|K14556 U3 small nucleolar RNA-associated protein 12 | (RefSeq) WD repeat-containing protein 3-like	[A]	RNA processing and modification	WD domain, G-beta repeat	--	WD-repeat protein OS=Solanum tuberosum OX=4113 GN=102603891 PE=4 SV=1	A	RNA processing and modification	PREDICTED: WD repeat-containing protein 3-like [Solanum tuberosum]
SMEL4.1_10g019470.1	[O]	Posttranslational modification, protein turnover, chaperones	Molecular Function: ATP binding (GO:0005524);; Biological Process: protein folding (GO:0006457);; Molecular Function: unfolded protein binding (GO:0051082);	K04079|1.2e-78|sot:102577431|K04079 molecular chaperone HtpG | (RefSeq) Hsp90-2-like	[O]	Posttranslational modification, protein turnover, chaperones	Hsp90 protein	Heat shock cognate protein 80 OS=Solanum lycopersicum OX=4081 GN=HSC80 PE=2 SV=1	HATPase_c domain-containing protein OS=Triticum turgidum subsp. durum OX=4567 GN=TRITD_5Bv1G146740 PE=3 SV=1	O	Posttranslational modification, protein turnover, chaperones	unnamed protein product [Triticum turgidum subsp. durum]
SMEL4.1_10g019480.1	[G]	Carbohydrate transport and metabolism	Biological Process: carbohydrate metabolic process (GO:0005975);; Molecular Function: racemase and epimerase activity, acting on carbohydrates and derivatives (GO:0016857);	K01783|4.5e-34|cann:107848114|K01783 ribulose-phosphate 3-epimerase [EC:5.1.3.1] | (RefSeq) ribulose-phosphate 3-epimerase, cytoplasmic isoform-like	[G]	Carbohydrate transport and metabolism	Ribulose-phosphate 3 epimerase family	Ribulose-phosphate 3-epimerase, cytoplasmic isoform OS=Oryza sativa subsp. japonica OX=39947 GN=Os09g0505700 PE=1 SV=1	Ribulose-phosphate 3-epimerase OS=Capsicum annuum OX=4072 GN=T459_27350 PE=3 SV=1	G	Carbohydrate transport and metabolism	Ribulose-phosphate 3-epimerase, cytoplasmic isoform [Capsicum annuum]
SMEL4.1_10g019490.1	--	--	Molecular Function: structural constituent of ribosome (GO:0003735);; Biological Process: translation (GO:0006412);; Cellular Component: small ribosomal subunit (GO:0015935);; Molecular Function: rRNA binding (GO:0019843);	K02997|1.1e-33|sind:105159949|K02997 small subunit ribosomal protein S9e | (RefSeq) 40S ribosomal protein S9-2	[J]	Translation, ribosomal structure and biogenesis	--	40S ribosomal protein S9-1 OS=Arabidopsis thaliana OX=3702 GN=RPS9B PE=1 SV=1	Ribosomal protein S4 OS=Handroanthus impetiginosus OX=429701 GN=CDL12_11042 PE=3 SV=1	J	Translation, ribosomal structure and biogenesis	Ribosomal protein S4 [Handroanthus impetiginosus]
SMEL4.1_10g019500.1	--	--	Biological Process: response to acid chemical (GO:0001101);; Molecular Function: catalase activity (GO:0004096);; Cellular Component: cellular_component (GO:0005575);; Cellular Component: intracellular (GO:0005622);; Cellular Component: obsolete cell (GO:0005623);; Cellular Component: cytoplasm (GO:0005737);; Cellular Component: vacuole (GO:0005773);; Cellular Component: vacuolar membrane (GO:000…	--	--	--	--	--	uncharacterized protein LOC107845689 OS=Capsicum annuum OX=4072 GN=LOC107845689 PE=4 SV=1	S	Function unknown	putative lipoxygenase -like proteiny domain-containing protein 1-like [Capsicum annuum]
SMEL4.1_10g019510.1	[J]	Translation, ribosomal structure and biogenesis	Molecular Function: structural constituent of ribosome (GO:0003735);; Biological Process: translation (GO:0006412);; Cellular Component: small ribosomal subunit (GO:0015935);; Molecular Function: rRNA binding (GO:0019843);	K02997|1.6e-93|sly:101253011|K02997 small subunit ribosomal protein S9e | (RefSeq) 40S ribosomal protein S9-2	[J]	Translation, ribosomal structure and biogenesis	S4 domain	40S ribosomal protein S9-2 OS=Arabidopsis thaliana OX=3702 GN=RPS9C PE=1 SV=1	S4 RNA-binding domain-containing protein OS=Capsicum baccatum OX=33114 GN=CQW23_01238 PE=3 SV=1	J	Translation, ribosomal structure and biogenesis	hypothetical protein CQW23_01238 [Capsicum baccatum]
SMEL4.1_10g019520.1	--	--	--	K21596|4.7e-31|nta:107794376|K21596 calmodulin-binding transcription activator | (RefSeq) uncharacterized LOC107794376	--	--	F-box associated	F-box/kelch-repeat protein At3g23880 OS=Arabidopsis thaliana OX=3702 GN=At3g23880 PE=2 SV=1	F-box domain-containing protein OS=Solanum tuberosum OX=4113 GN=107058807 PE=4 SV=1	S	Function unknown	PREDICTED: F-box protein CPR30-like [Solanum tuberosum]
SMEL4.1_10g019530.1	--	--	Molecular Function: molecular_function (GO:0003674);; Molecular Function: nucleic acid binding (GO:0003676);; Molecular Function: RNA binding (GO:0003723);; Molecular Function: binding (GO:0005488);; Molecular Function: protein binding (GO:0005515);; Cellular Component: cellular_component (GO:0005575);; Cellular Component: intracellular (GO:0005622);; Cellular Component: obsolete cell (GO:0005623…	K14556|1.3e-107|nta:107818696|K14556 U3 small nucleolar RNA-associated protein 12 | (RefSeq) WD repeat-containing protein 3-like	[A]	RNA processing and modification	WD domain, G-beta repeat	--	WD_REPEATS_REGION domain-containing protein OS=Punica granatum OX=22663 GN=CDL15_Pgr025528 PE=4 SV=1	A	RNA processing and modification	WD repeat-containing protein 3 [Punica granatum]
SMEL4.1_10g019540.1	--	--	Biological Process: maturation of SSU-rRNA (GO:0030490);; Molecular Function: snoRNA binding (GO:0030515);; Cellular Component: small-subunit processome (GO:0032040);; Cellular Component: Pwp2p-containing subcomplex of 90S preribosome (GO:0034388);	K14556|2.7e-59|nau:109213922|K14556 U3 small nucleolar RNA-associated protein 12 | (RefSeq) mitochondrial division protein 1-like	[A]	RNA processing and modification	--	--	WD repeat-containing protein 3-like OS=Nicotiana tabacum OX=4097 GN=LOC107818696 PE=4 SV=1	A	RNA processing and modification	PREDICTED: mitochondrial division protein 1-like [Nicotiana attenuata]
SMEL4.1_10g019550.1	[J]	Translation, ribosomal structure and biogenesis	Molecular Function: structural constituent of ribosome (GO:0003735);; Biological Process: translation (GO:0006412);; Cellular Component: small ribosomal subunit (GO:0015935);; Molecular Function: rRNA binding (GO:0019843);	K02997|9.5e-55|cann:107878116|K02997 small subunit ribosomal protein S9e | (RefSeq) 40S ribosomal protein S9-2	[J]	Translation, ribosomal structure and biogenesis	--	40S ribosomal protein S9-1 OS=Arabidopsis thaliana OX=3702 GN=RPS9B PE=1 SV=1	40S ribosomal protein S9 OS=Capsicum baccatum OX=33114 GN=CQW23_21294 PE=3 SV=1	J	Translation, ribosomal structure and biogenesis	40S ribosomal protein S9 [Capsicum annuum]
SMEL4.1_10g019560.1	[J]	Translation, ribosomal structure and biogenesis	Molecular Function: structural constituent of ribosome (GO:0003735);; Biological Process: translation (GO:0006412);; Cellular Component: small ribosomal subunit (GO:0015935);; Molecular Function: rRNA binding (GO:0019843);	K02997|9.7e-88|nta:107790316|K02997 small subunit ribosomal protein S9e | (RefSeq) 40S ribosomal protein S9-2-like	[J]	Translation, ribosomal structure and biogenesis	S4 domain	40S ribosomal protein S9-2 OS=Arabidopsis thaliana OX=3702 GN=RPS9C PE=1 SV=1	S4 RNA-binding domain-containing protein OS=Capsicum baccatum OX=33114 GN=CQW23_01238 PE=3 SV=1	J	Translation, ribosomal structure and biogenesis	hypothetical protein CQW23_01238 [Capsicum baccatum]
SMEL4.1_10g019570.1	--	--	--	K21596|4.4e-30|nta:107794376|K21596 calmodulin-binding transcription activator | (RefSeq) uncharacterized LOC107794376	--	--	F-box associated	F-box protein CPR1 OS=Arabidopsis thaliana OX=3702 GN=CPR1 PE=1 SV=2	F-box domain-containing protein OS=Solanum tuberosum OX=4113 GN=107058807 PE=4 SV=1	S	Function unknown	PREDICTED: F-box protein CPR30-like [Solanum tuberosum]
SMEL4.1_10g019580.1	--	--	Molecular Function: molecular_function (GO:0003674);; Molecular Function: nucleic acid binding (GO:0003676);; Molecular Function: RNA binding (GO:0003723);; Molecular Function: binding (GO:0005488);; Molecular Function: protein binding (GO:0005515);; Cellular Component: cellular_component (GO:0005575);; Cellular Component: intracellular (GO:0005622);; Cellular Component: obsolete cell (GO:0005623…	K14556|4.0e-206|sot:102603891|K14556 U3 small nucleolar RNA-associated protein 12 | (RefSeq) WD repeat-containing protein 3-like	[A]	RNA processing and modification	WD domain, G-beta repeat	--	WD-repeat protein OS=Solanum tuberosum OX=4113 GN=102603891 PE=4 SV=1	A	RNA processing and modification	PREDICTED: WD repeat-containing protein 3-like [Solanum tuberosum]
SMEL4.1_10g019590.1	--	--	Molecular Function: molecular_function (GO:0003674);; Molecular Function: nucleic acid binding (GO:0003676);; Molecular Function: RNA binding (GO:0003723);; Molecular Function: binding (GO:0005488);; Molecular Function: protein binding (GO:0005515);; Cellular Component: cellular_component (GO:0005575);; Cellular Component: intracellular (GO:0005622);; Cellular Component: obsolete cell (GO:0005623…	K14556|2.0e-94|psom:113298703|K14556 U3 small nucleolar RNA-associated protein 12 | (RefSeq) WD repeat-containing protein 3-like	[A]	RNA processing and modification	WD domain, G-beta repeat	--	WD_REPEATS_REGION domain-containing protein OS=Papaver somniferum OX=3469 GN=C5167_003585 PE=4 SV=1	A	RNA processing and modification	hypothetical protein F8388_002846 [Cannabis sativa]
SMEL4.1_10g019600.1	[O]	Posttranslational modification, protein turnover, chaperones	Molecular Function: ATP binding (GO:0005524);; Cellular Component: cytoplasm (GO:0005737);; Cellular Component: cytosol (GO:0005829);; Cellular Component: plasma membrane (GO:0005886);; Biological Process: protein folding (GO:0006457);; Cellular Component: cell surface (GO:0009986);; Cellular Component: protein-containing complex (GO:0032991);; Biological Process: cellular response to heat (GO:00…	K04079|2.7e-90|sot:102577431|K04079 molecular chaperone HtpG | (RefSeq) Hsp90-2-like	[O]	Posttranslational modification, protein turnover, chaperones	Hsp90 protein	Heat shock cognate protein 80 OS=Solanum lycopersicum OX=4081 GN=HSC80 PE=2 SV=1	HATPase_c domain-containing protein OS=Brassica rapa subsp. pekinensis OX=51351 PE=3 SV=1	O	Posttranslational modification, protein turnover, chaperones	unnamed protein product [Triticum turgidum subsp. durum]
SMEL4.1_10g019620.1	--	--	--	--	--	--	--	--	Putative ovule protein OS=Solanum chacoense OX=4108 PE=4 SV=1	--	--	PREDICTED: uncharacterized protein LOC102590485 [Solanum tuberosum]
SMEL4.1_10g019630.1	--	--	Molecular Function: protein serine/threonine kinase activity (GO:0004674);; Molecular Function: ATP binding (GO:0005524);; Cellular Component: integral component of membrane (GO:0016021);	K00924|1.1e-64|atr:18446750|K00924 kinase [EC:2.7.1.-] | (RefSeq) receptor protein kinase CLAVATA1	--	--	Leucine rich repeat	LRR receptor-like serine/threonine-protein kinase GSO1 OS=Arabidopsis thaliana OX=3702 GN=GSO1 PE=1 SV=1	Leucine Rich Repeat family protein OS=Solanum tuberosum OX=4113 GN=102590832 PE=3 SV=1	T	Signal transduction mechanisms	PREDICTED: LRR receptor-like serine/threonine-protein kinase GSO1 [Solanum tuberosum]
SMEL4.1_10g019640.1	--	--	--	--	--	--	--	--	Uncharacterized protein OS=Solanum tuberosum OX=4113 PE=4 SV=1	--	--	hypothetical protein T459_30081 [Capsicum annuum]
SMEL4.1_10g019660.1	--	--	Cellular Component: ubiquitin ligase complex (GO:0000151);; Molecular Function: molecular_function (GO:0003674);; Molecular Function: binding (GO:0005488);; Molecular Function: protein binding (GO:0005515);; Cellular Component: cellular_component (GO:0005575);; Cellular Component: intracellular (GO:0005622);; Cellular Component: obsolete cell (GO:0005623);; Cellular Component: nucleus (GO:0005634…	K01213|6.1e-08|ini:109147380|K01213 galacturan 1,4-alpha-galacturonidase [EC:3.2.1.67] | (RefSeq) exopolygalacturonase-like	[R]	General function prediction only	Kelch motif	F-box/kelch-repeat protein SKIP11 OS=Arabidopsis thaliana OX=3702 GN=SKIP11 PE=1 SV=2	Putative ovule protein OS=Solanum chacoense OX=4108 PE=4 SV=1	S	Function unknown	kelch repeat-containing F-box family protein, putative [Solanum demissum]
SMEL4.1_10g019670.1	--	--	Cellular Component: nucleus (GO:0005634);; Biological Process: regulation of transcription, DNA-templated (GO:0006355);; Molecular Function: sequence-specific DNA binding (GO:0043565);	K09338|1.4e-128|cann:107847920|K09338 homeobox-leucine zipper protein | (RefSeq) homeobox-leucine zipper protein ATHB-13	[K]	Transcription	Homeobox associated leucine zipper	Homeobox-leucine zipper protein ATHB-13 OS=Arabidopsis thaliana OX=3702 GN=ATHB-13 PE=2 SV=2	Homeobox-leucine zipper protein HOX21 OS=Capsicum baccatum OX=33114 GN=CQW23_25778 PE=4 SV=1	K	Transcription	Homeobox-leucine zipper protein HOX21 [Capsicum baccatum]
SMEL4.1_10g019680.1	[G]	Carbohydrate transport and metabolism	Cellular Component: integral component of membrane (GO:0016021);	K15378|0.0e+00|sot:102577901|K15378 solute carrier family 45, member 1/2/4 | (RefSeq) SUT2; sucrose transporter-like protein	[G]	Carbohydrate transport and metabolism	MFS/sugar transport protein	Sucrose transport protein SUC3 OS=Arabidopsis thaliana OX=3702 GN=SUC3 PE=1 SV=1	Putative sucrose transporter-like protein OS=Solanum demissum OX=50514 GN=PGEC219.5 PE=3 SV=1	G	Carbohydrate transport and metabolism	putative sucrose transporter-like protein [Solanum demissum]
SMEL4.1_10g019690.1	--	--	Molecular Function: RNA binding (GO:0003723);	--	--	--	RNA recognition motif. (a.k.a. RRM, RBD, or RNP domain)	Binding partner of ACD11 1 OS=Arabidopsis thaliana OX=3702 GN=BPA1 PE=1 SV=1	Uncharacterized protein PGEC219.9 OS=Solanum demissum OX=50514 GN=PGEC219.9 PE=4 SV=1	A	RNA processing and modification	hypothetical protein [Solanum demissum]
SMEL4.1_10g019700.1	--	--	--	--	--	--	--	--	Uncharacterized protein OS=Solanum tuberosum OX=4113 PE=4 SV=1	--	--	hypothetical protein FXO38_15513 [Capsicum annuum]
SMEL4.1_10g019710.1	--	--	Molecular Function: protein dimerization activity (GO:0046983);	--	--	--	Helix-loop-helix DNA-binding domain	Transcription factor PRE6 OS=Arabidopsis thaliana OX=3702 GN=PRE6 PE=1 SV=1	Transcription factor PRE4 OS=Capsicum baccatum OX=33114 GN=CQW23_25757 PE=4 SV=1	K	Transcription	transcription factor PRE6-like [Solanum lycopersicum]
SMEL4.1_10g019720.1	--	--	Biological Process: defense response (GO:0006952);; Molecular Function: ADP binding (GO:0043531);	--	--	--	--	--	Cc-nbs-lrr resistance protein OS=Solanum tuberosum OX=4113 PE=3 SV=1	T	Signal transduction mechanisms	PREDICTED: putative disease resistance protein RGA4 isoform X1 [Solanum tuberosum]
SMEL4.1_10g019730.1	--	--	--	--	--	--	MAC/Perforin domain	MACPF domain-containing protein CAD1 OS=Arabidopsis thaliana OX=3702 GN=CAD1 PE=2 SV=1	MACPF domain-containing protein CAD1 OS=Capsicum chinense OX=80379 GN=BC332_26042 PE=4 SV=1	S	Function unknown	PREDICTED: MACPF domain-containing protein CAD1-like [Solanum tuberosum]
SMEL4.1_10g019740.1	--	--	--	--	--	--	Plant mobile domain	Protein MAIN-LIKE 1 OS=Arabidopsis thaliana OX=3702 GN=MAIL1 PE=1 SV=1	uncharacterized protein LOC107844948 isoform X1 OS=Capsicum annuum OX=4072 GN=LOC107844948 PE=4 SV=1	--	--	PREDICTED: uncharacterized protein LOC102589384 [Solanum tuberosum]
SMEL4.1_10g019750.1	--	--	Molecular Function: DNA-binding transcription factor activity (GO:0003700);; Cellular Component: nucleus (GO:0005634);; Molecular Function: sequence-specific DNA binding (GO:0043565);	K13459|1.4e-18|cqi:110714731|K13459 disease resistance protein RPS2 | (RefSeq) probable disease resistance protein At4g27220 isoform X1	--	--	WRKY DNA -binding domain	Probable WRKY transcription factor 70 OS=Arabidopsis thaliana OX=3702 GN=WRKY70 PE=1 SV=1	probable WRKY transcription factor 70 OS=Capsicum annuum OX=4072 GN=LOC107843395 PE=4 SV=1	K	Transcription	PREDICTED: probable WRKY transcription factor 70 [Capsicum annuum]
SMEL4.1_10g019760.1	[S]	Function unknown	--	--	--	--	PRC-barrel domain	--	Putative ovule protein OS=Solanum chacoense OX=4108 PE=4 SV=1	--	--	PREDICTED: uncharacterized protein LOC102591273 [Solanum tuberosum]
SMEL4.1_10g019770.1	[M]	Cell wall/membrane/envelope biogenesis	Molecular Function: protein serine/threonine kinase activity (GO:0004674);; Molecular Function: ATP binding (GO:0005524);; Cellular Component: chloroplast (GO:0009507);; Cellular Component: thylakoid (GO:0009579);; Biological Process: photosystem II stabilization (GO:0042549);	K19603|1.1e-08|ppp:112277144|K19603 mitogen-activated protein kinase 15 [EC:2.7.11.24] | (RefSeq) extracellular signal-regulated kinase 2-like isoform X1	[R]	General function prediction only	Protein kinase domain	Serine/threonine-protein kinase STN8, chloroplastic OS=Arabidopsis thaliana OX=3702 GN=STN8 PE=2 SV=1	Protein kinase domain-containing protein OS=Solanum tuberosum OX=4113 GN=102590921 PE=3 SV=1	T	Signal transduction mechanisms	PREDICTED: serine/threonine-protein kinase STN8, chloroplastic [Solanum tuberosum]
SMEL4.1_10g019780.1	[T]	Signal transduction mechanisms	Molecular Function: protein serine/threonine kinase activity (GO:0004674);; Molecular Function: ATP binding (GO:0005524);; Cellular Component: integral component of membrane (GO:0016021);	K16224|1.2e-63|ath:AT2G19190|K16224 senescence-induced receptor-like serine/threonine-protein kinase | (RefSeq) FRK1; FLG22-induced receptor-like kinase 1	--	--	Protein tyrosine and serine/threonine kinase	Leucine-rich repeat receptor protein kinase HPCA1 OS=Arabidopsis thaliana OX=3702 GN=HPCA1 PE=1 SV=1	Protein kinase domain-containing protein OS=Solanum lycopersicum OX=4081 GN=101268631 PE=3 SV=1	T	Signal transduction mechanisms	probable leucine-rich repeat receptor-like protein kinase At5g49770 [Solanum pennellii]
SMEL4.1_10g019790.1	[IQR]	--	--	K09841|1.4e-71|aof:109848475|K09841 xanthoxin dehydrogenase [EC:1.1.1.288] | (RefSeq) zerumbone synthase	[R]	General function prediction only	Enoyl-(Acyl carrier protein) reductase	Secoisolariciresinol dehydrogenase (Fragment) OS=Podophyllum peltatum OX=35933 PE=1 SV=1	Short chain alcohol dehydrogenase OS=Solanum tuberosum OX=4113 GN=102590241 PE=4 SV=1	Q	Secondary metabolites biosynthesis, transport and catabolism	PREDICTED: secoisolariciresinol dehydrogenase-like [Solanum tuberosum]
SMEL4.1_10g019810.1	[R]	General function prediction only	Biological Process: defense response (GO:0006952);; Molecular Function: ADP binding (GO:0043531);	K15078|1.6e-121|tcc:18614561|K15078 structure-specific endonuclease subunit SLX1 [EC:3.6.1.-] | (RefSeq) putative disease resistance protein RGA3	[T]	Signal transduction mechanisms	NB-ARC domain	Putative disease resistance protein RGA3 OS=Solanum bulbocastanum OX=147425 GN=RGA3 PE=2 SV=2	Cc-nbs-lrr resistance protein OS=Solanum tuberosum OX=4113 PE=3 SV=1	T	Signal transduction mechanisms	PREDICTED: putative disease resistance protein RGA1 [Solanum tuberosum]
SMEL4.1_10g019820.1	--	--	--	--	--	--	--	F-box protein SKIP24 OS=Arabidopsis thaliana OX=3702 GN=SKIP24 PE=1 SV=2	F-box family protein OS=Solanum tuberosum OX=4113 GN=102589928 PE=4 SV=1	S	Function unknown	LOW QUALITY PROTEIN: F-box protein SKIP24 [Solanum pennellii]
SMEL4.1_10g019840.1	[M]	Cell wall/membrane/envelope biogenesis	Molecular Function: protein kinase activity (GO:0004672);; Molecular Function: ATP binding (GO:0005524);	K08832|4.9e-280|sot:102588730|K08832 serine/threonine-protein kinase SRPK3 [EC:2.7.11.1] | (RefSeq) SRSF protein kinase 1-like	[T]	Signal transduction mechanisms	Protein kinase domain	Serine/threonine-protein kinase AFC2 OS=Arabidopsis thaliana OX=3702 GN=AFC2 PE=1 SV=1	Srpk OS=Solanum tuberosum OX=4113 GN=102588730 PE=4 SV=1	T	Signal transduction mechanisms	PREDICTED: SRSF protein kinase 1-like [Solanum tuberosum]
SMEL4.1_10g019850.1	--	--	Biological Process: protein glycosylation (GO:0006486);; Cellular Component: integral component of membrane (GO:0016021);; Molecular Function: transferase activity, transferring glycosyl groups (GO:0016757);	K18789|1.1e-115|pda:103710851|K18789 xylogalacturonan beta-1,3-xylosyltransferase [EC:2.4.2.41] | (RefSeq) probable glycosyltransferase At5g20260	[GMW]	--	Exostosin family	Probable glycosyltransferase At5g03795 OS=Arabidopsis thaliana OX=3702 GN=At5g03795 PE=3 SV=2	Glycosyltransferase OS=Solanum tuberosum OX=4113 GN=102589064 PE=3 SV=1	--	--	PREDICTED: probable glycosyltransferase At5g03795 [Solanum tuberosum]
SMEL4.1_10g019860.1	[IR]	--	Molecular Function: hydrolase activity, acting on ester bonds (GO:0016788);	K00679|2.5e-131|cic:CICLE_v10027727mg|K00679 phospholipid:diacylglycerol acyltransferase [EC:2.3.1.158] | (RefSeq) hypothetical protein	--	--	GDSL-like Lipase/Acylhydrolase	GDSL esterase/lipase At5g03820 OS=Arabidopsis thaliana OX=3702 GN=At5g03820 PE=3 SV=1	Zinc finger protein OS=Solanum tuberosum OX=4113 GN=102588400 PE=3 SV=1	L	Replication, recombination and repair	PREDICTED: GDSL esterase/lipase At5g03820-like [Solanum tuberosum]
SMEL4.1_10g019880.1	--	--	Molecular Function: riboflavin kinase activity (GO:0008531);; Biological Process: riboflavin biosynthetic process (GO:0009231);	K20884|2.0e-51|sot:102593343|K20884 riboflavin kinase / FMN hydrolase [EC:2.7.1.26 3.1.3.102] | (RefSeq) bifunctional riboflavin kinase/FMN phosphatase	[H]	Coenzyme transport and metabolism	Riboflavin kinase	Bifunctional riboflavin kinase/FMN phosphatase OS=Arabidopsis thaliana OX=3702 GN=FHY PE=1 SV=1	Riboflavin kinase OS=Solanum tuberosum OX=4113 PE=4 SV=1	H	Coenzyme transport and metabolism	PREDICTED: bifunctional riboflavin kinase/FMN phosphatase [Solanum tuberosum]
SMEL4.1_10g019910.1	--	--	--	K14766|2.9e-45|nau:109227645|K14766 nucleolar protein 14 | (RefSeq) mitotic apparatus protein p62-like	[R]	General function prediction only	Reverse transcriptase (RNA-dependent DNA polymerase)	--	Putative ovule protein OS=Solanum chacoense OX=4108 PE=4 SV=1	S	Function unknown	PREDICTED: uncharacterized protein LOC107058099 [Solanum tuberosum]
SMEL4.1_10g019920.1	--	--	Molecular Function: aspartic-type endopeptidase activity (GO:0004190);; Cellular Component: integral component of membrane (GO:0016021);	K00924|5.7e-149|qsu:112035499|K00924 kinase [EC:2.7.1.-] | (RefSeq) aspartic proteinase-like protein 2	[O]	Posttranslational modification, protein turnover, chaperones	Xylanase inhibitor N-terminal	Aspartic proteinase 36 OS=Arabidopsis thaliana OX=3702 GN=A36 PE=1 SV=1	Aspartic proteinase Asp1 OS=Solanum tuberosum OX=4113 PE=3 SV=1	O	Posttranslational modification, protein turnover, chaperones	PREDICTED: aspartic proteinase-like protein 2 isoform X1 [Solanum tuberosum]
SMEL4.1_10g019930.1	[L]	Replication, recombination and repair	Molecular Function: nucleic acid binding (GO:0003676);; Molecular Function: ATP binding (GO:0005524);; Cellular Component: nuclear envelope (GO:0005635);; Cellular Component: cytoplasm (GO:0005737);; Cellular Component: plasma membrane (GO:0005886);; Molecular Function: RNA-dependent ATPase activity (GO:0008186);; Biological Process: response to heat (GO:0009408);; Biological Process: response to…	K18655|1.6e-259|sly:101243705|K18655 ATP-dependent RNA helicase DDX19/DBP5 [EC:3.6.4.13] | (RefSeq) DEAD-box ATP-dependent RNA helicase 38	[A]	RNA processing and modification	DEAD/DEAH box helicase	DEAD-box ATP-dependent RNA helicase 38 OS=Arabidopsis thaliana OX=3702 GN=RH38 PE=1 SV=2	RNA helicase OS=Solanum tuberosum OX=4113 GN=102600806 PE=4 SV=1	A	RNA processing and modification	DEAD-box ATP-dependent RNA helicase 38 [Solanum lycopersicum]
SMEL4.1_10g019940.1	--	--	Cellular Component: integral component of membrane (GO:0016021);	K19038|4.1e-12|lja:Lj3g3v2838550.1|K19038 E3 ubiquitin-protein ligase ATL41 [EC:2.3.2.27] | (RefSeq) Lj3g3v2838550.1; -	[O]	Posttranslational modification, protein turnover, chaperones	Ring finger domain	RING-H2 finger protein ATL17 OS=Arabidopsis thaliana OX=3702 GN=ATL17 PE=2 SV=2	RING-H2 finger protein ATL52-like OS=Capsicum annuum OX=4072 GN=LOC107844942 PE=4 SV=1	O	Posttranslational modification, protein turnover, chaperones	DEAD-box ATP-dependent RNA helicase 38 [Capsicum annuum]
SMEL4.1_10g019950.1	--	--	--	--	--	--	PLATZ transcription factor	--	Uncharacterized protein OS=Solanum tuberosum OX=4113 GN=102601147 PE=4 SV=1	S	Function unknown	uncharacterized protein LOC101253847 [Solanum lycopersicum]
SMEL4.1_10g019960.1	--	--	Cellular Component: ESCRT I complex (GO:0000813);; Biological Process: protein transport (GO:0015031);; Biological Process: endosome transport via multivesicular body sorting pathway (GO:0032509);	K12185|5.5e-96|sot:102601485|K12185 ESCRT-I complex subunit VPS37 | (RefSeq) vacuolar protein-sorting-associated protein 37 homolog 1	[S]	Function unknown	Modifier of rudimentary (Mod(r)) protein	Vacuolar protein-sorting-associated protein 37 homolog 1 OS=Arabidopsis thaliana OX=3702 GN=VPS37-1 PE=1 SV=1	Putative vacuolar protein-sorting-associated protein 37-like OS=Solanum chacoense OX=4108 PE=3 SV=1	U	Intracellular trafficking, secretion, and vesicular transport	PREDICTED: vacuolar protein-sorting-associated protein 37 homolog 1 [Solanum tuberosum]
SMEL4.1_10g019970.1	--	--	--	K19373|2.0e-113|sot:102601820|K19373 DnaJ homolog subfamily C member 28 | (RefSeq) dnaJ homolog subfamily C member 28-like	[O]	Posttranslational modification, protein turnover, chaperones	Domain of unknown function (DUF1992)	--	Putative dnaJ subfamily C member 28-like OS=Solanum chacoense OX=4108 PE=4 SV=1	O	Posttranslational modification, protein turnover, chaperones	PREDICTED: dnaJ homolog subfamily C member 28-like [Solanum tuberosum]
SMEL4.1_10g019980.1	[H]	Coenzyme transport and metabolism	Molecular Function: O-methyltransferase activity (GO:0008171);	K13066|1.6e-72|smo:SELMODRAFT_450945|K13066 caffeic acid 3-O-methyltransferase [EC:2.1.1.68] | (RefSeq) COMT1-2; caffeic acid O-methyltransferase	[R]	General function prediction only	O-methyltransferase domain	Caffeic acid 3-O-methyltransferase OS=Catharanthus roseus OX=4058 GN=COMT1 PE=2 SV=1	O-methyltransferase OS=Solanum tuberosum OX=4113 GN=102602494 PE=3 SV=1	S	Function unknown	caffeic acid 3-O-methyltransferase 1-like [Solanum pennellii]
SMEL4.1_10g019990.1	--	--	Molecular Function: UDP-glycosyltransferase activity (GO:0008194);	K13496|1.1e-161|tcc:108662272|K13496 UDP-glucosyltransferase 73C [EC:2.4.1.-] | (RefSeq) UDP-glycosyltransferase 73C6-like	[GC]	--	UDP-glucoronosyl and UDP-glucosyl transferase	UDP-glycosyltransferase 73D1 OS=Arabidopsis thaliana OX=3702 GN=UGT73D1 PE=3 SV=1	Glycosyltransferase OS=Solanum tuberosum OX=4113 GN=102602828 PE=3 SV=1	--	--	PREDICTED: UDP-glycosyltransferase 73D1 [Solanum tuberosum]
SMEL4.1_10g020010.1	--	--	Molecular Function: UDP-glycosyltransferase activity (GO:0008194);	K13496|9.9e-251|sot:102603165|K13496 UDP-glucosyltransferase 73C [EC:2.4.1.-] | (RefSeq) UDP-glycosyltransferase 73C3-like	[GC]	--	UDP-glucoronosyl and UDP-glucosyl transferase	UDP-glycosyltransferase 73C3 OS=Arabidopsis thaliana OX=3702 GN=UGT73C3 PE=2 SV=1	Glycosyltransferase OS=Capsicum annuum OX=4072 GN=LOC107843377 PE=3 SV=1	--	--	PREDICTED: UDP-glycosyltransferase 73C3-like [Solanum tuberosum]
SMEL4.1_10g020020.1	--	--	Molecular Function: UDP-glycosyltransferase activity (GO:0008194);	K13496|2.3e-247|sot:102593972|K13496 UDP-glucosyltransferase 73C [EC:2.4.1.-] | (RefSeq) UDP-glycosyltransferase 73C3-like	[GC]	--	UDP-glucoronosyl and UDP-glucosyl transferase	UDP-glycosyltransferase 73C4 OS=Solanum lycopersicum OX=4081 GN=UGT73C4 PE=2 SV=1	Flavonoid glucoyltransferase UGT73E2 OS=Solanum tuberosum OX=4113 GN=102593972 PE=4 SV=1	--	--	PREDICTED: UDP-glycosyltransferase 73C3-like [Solanum tuberosum]
SMEL4.1_10g020030.1	[R]	General function prediction only	Molecular Function: protein binding (GO:0005515);	--	--	--	Tetratricopeptide repeat	--	Chloroplast lumen common family protein OS=Solanum tuberosum OX=4113 PE=4 SV=1	S	Function unknown	hypothetical protein EJD97_018268 [Solanum chilense]
SMEL4.1_10g020040.1	--	--	Biological Process: metal ion transport (GO:0030001);; Molecular Function: metal ion binding (GO:0046872);	K14292|1.7e-16|spen:107013477|K14292 trimethylguanosine synthase [EC:2.1.1.-] | (RefSeq) trimethylguanosine synthase	[P]	Inorganic ion transport and metabolism	Heavy-metal-associated domain	Protein SODIUM POTASSIUM ROOT DEFECTIVE 2 OS=Arabidopsis thaliana OX=3702 GN=NAKR2 PE=2 SV=1	Chloroplast-targeted copper chaperone OS=Solanum tuberosum OX=4113 GN=102593645 PE=4 SV=1	P	Inorganic ion transport and metabolism	PREDICTED: uncharacterized protein LOC102593645 [Solanum tuberosum]
SMEL4.1_10g020050.1	[M]	Cell wall/membrane/envelope biogenesis	Cellular Component: integral component of membrane (GO:0016021);	K08678|2.7e-217|sot:102593324|K08678 UDP-glucuronate decarboxylase [EC:4.1.1.35] | (RefSeq) UDP-glucuronic acid decarboxylase 1-like	[GM]	--	GDP-mannose 4,6 dehydratase	UDP-glucuronic acid decarboxylase 1 OS=Arabidopsis thaliana OX=3702 GN=UXS1 PE=1 SV=1	Uncharacterized protein OS=Solanum lycopersicum OX=4081 PE=4 SV=1	--	--	PREDICTED: UDP-glucuronic acid decarboxylase 1-like [Solanum tuberosum]
SMEL4.1_10g020060.1	--	--	Cellular Component: chloroplast (GO:0009507);	--	--	--	Protein of unknown function (DUF565)	Ycf20-like protein OS=Arabidopsis thaliana OX=3702 GN=At1g65420 PE=2 SV=2	Uncharacterized protein OS=Capsicum annuum OX=4072 GN=T459_25735 PE=3 SV=1	S	Function unknown	putative nitrate transporter 1.5-like [Capsicum annuum]
SMEL4.1_10g020070.1	--	--	Cellular Component: plasma membrane (GO:0005886);; Molecular Function: kinase inhibitor activity (GO:0019210);	--	--	--	--	Probable membrane-associated kinase regulator 4 OS=Arabidopsis thaliana OX=3702 GN=MAKR4 PE=3 SV=1	Uncharacterized protein OS=Capsicum annuum OX=4072 GN=T459_25734 PE=4 SV=1	--	--	hypothetical protein FXO38_22932 [Capsicum annuum]
SMEL4.1_10g020080.1	[P]	Inorganic ion transport and metabolism	Cellular Component: integral component of membrane (GO:0016021);	K02069|3.8e-132|sot:102592654|K02069 putative ABC transport system permease protein | (RefSeq) protein ALUMINUM SENSITIVE 3	--	--	Uncharacterised protein family (UPF0014)	Protein ALUMINUM SENSITIVE 3 OS=Arabidopsis thaliana OX=3702 GN=ALS3 PE=1 SV=1	Protein ALUMINUM SENSITIVE 3 OS=Solanum tuberosum OX=4113 GN=102592654 PE=3 SV=1	S	Function unknown	PREDICTED: protein ALUMINUM SENSITIVE 3 [Solanum tuberosum]
SMEL4.1_10g020090.1	[S]	Function unknown	Cellular Component: extracellular region (GO:0005576);	K13449|1.5e-29|eus:EUTSA_v10015461mg|K13449 pathogenesis-related protein 1 | (RefSeq) hypothetical protein	[S]	Function unknown	Cysteine-rich secretory protein family	Pathogenesis-related protein PR-1 OS=Medicago truncatula OX=3880 GN=PR-1 PE=2 SV=1	Putative pathogenesis-related protein PRMS-like OS=Solanum chacoense OX=4108 PE=4 SV=1	S	Function unknown	pathogenesis-related protein PRB1-2-like [Solanum pennellii]
SMEL4.1_10g020110.1	--	--	Cellular Component: cellular_component (GO:0005575);; Cellular Component: intracellular (GO:0005622);; Cellular Component: obsolete cell (GO:0005623);; Cellular Component: nucleus (GO:0005634);; Biological Process: RNA localization (GO:0006403);; Biological Process: RNA export from nucleus (GO:0006405);; Biological Process: mRNA export from nucleus (GO:0006406);; Biological Process: protein expor…	K18732|7.7e-42|spen:107002509|K18732 SAP domain-containing ribonucleoprotein | (RefSeq) protein MODIFIER OF SNC1 11-like	--	--	Tho1/MOS11 C-terminal domain	--	Putative SAP domain-containing ribonucleoprotein-like OS=Solanum chacoense OX=4108 PE=4 SV=1	S	Function unknown	PREDICTED: protein MODIFIER OF SNC1 11-like isoform X2 [Solanum tuberosum]
SMEL4.1_10g020120.1	--	--	Molecular Function: nucleic acid binding (GO:0003676);; Cellular Component: nucleus (GO:0005634);; Biological Process: mRNA processing (GO:0006397);	K14792|9.5e-198|cann:107868160|K14792 rRNA biogenesis protein RRP5 | (RefSeq) rRNA biogenesis protein RRP5	[A]	RNA processing and modification	S1 RNA binding domain	rRNA biogenesis protein RRP5 OS=Arabidopsis thaliana OX=3702 GN=RRP5 PE=2 SV=2	Uncharacterized protein OS=Solanum chacoense OX=4108 PE=4 SV=1	A	RNA processing and modification	putative protein RRP5 -like protein isoform X2, partial [Capsicum annuum]
SMEL4.1_10g020130.1	[J]	Translation, ribosomal structure and biogenesis	Molecular Function: nucleic acid binding (GO:0003676);; Cellular Component: nucleus (GO:0005634);; Biological Process: mRNA processing (GO:0006397);	K14792|0.0e+00|sly:101261692|K14792 rRNA biogenesis protein RRP5 | (RefSeq) rRNA biogenesis protein RRP5	[A]	RNA processing and modification	S1 RNA binding domain	rRNA biogenesis protein RRP5 OS=Arabidopsis thaliana OX=3702 GN=RRP5 PE=2 SV=2	Uncharacterized protein OS=Solanum chacoense OX=4108 PE=4 SV=1	A	RNA processing and modification	hypothetical protein EJD97_008585 [Solanum chilense]
SMEL4.1_10g020140.1	[P]	Inorganic ion transport and metabolism	Cellular Component: integral component of membrane (GO:0016021);	K05794|1.1e-40|ccaj:109794752|K05794 tellurite resistance protein TerC | (RefSeq) uncharacterized protein LOC109794752	--	--	Integral membrane protein TerC family	Thylakoid membrane protein TERC, chloroplastic OS=Arabidopsis thaliana OX=3702 GN=TERC PE=1 SV=1	Uncharacterized protein OS=Solanum lycopersicum OX=4081 GN=101251832 PE=4 SV=1	P	Inorganic ion transport and metabolism	thylakoid membrane protein TERC, chloroplastic [Solanum lycopersicum]
SMEL4.1_10g020150.1	--	--	Molecular Function: protein serine/threonine kinase activity (GO:0004674);; Molecular Function: ATP binding (GO:0005524);	K13430|2.6e-142|jcu:105644862|K13430 serine/threonine-protein kinase PBS1 [EC:2.7.11.1] | (RefSeq) serine/threonine-protein kinase PBS1	[T]	Signal transduction mechanisms	Protein tyrosine and serine/threonine kinase	Probable serine/threonine-protein kinase PBL7 OS=Arabidopsis thaliana OX=3702 GN=PBL7 PE=1 SV=1	Receptor serine-threonine protein kinase OS=Solanum tuberosum OX=4113 GN=102590835 PE=3 SV=1	T	Signal transduction mechanisms	probable serine/threonine-protein kinase PBL7 [Solanum lycopersicum]
SMEL4.1_10g020160.1	[T]	Signal transduction mechanisms	Biological Process: phosphorelay signal transduction system (GO:0000160);	K12129|3.0e-260|sot:102590489|K12129 pseudo-response regulator 7 | (RefSeq) two-component response regulator-like APRR7	[K]	Transcription	Response regulator receiver domain	Two-component response regulator-like APRR7 OS=Arabidopsis thaliana OX=3702 GN=APRR7 PE=1 SV=1	Response regulatory domain-containing protein OS=Capsicum chinense OX=80379 GN=BC332_26002 PE=4 SV=1	K	Transcription	PREDICTED: two-component response regulator-like APRR7 isoform X1 [Solanum tuberosum]
SMEL4.1_10g020170.1	[J]	Translation, ribosomal structure and biogenesis	Molecular Function: structural constituent of ribosome (GO:0003735);; Cellular Component: ribosome (GO:0005840);; Biological Process: translation (GO:0006412);	K02930|2.7e-217|sot:102590167|K02930 large subunit ribosomal protein L4e | (RefSeq) 60S ribosomal protein L4-1-like	[A]	RNA processing and modification	Ribosomal protein L4/L1 family	60S ribosomal protein L4 OS=Prunus armeniaca OX=36596 GN=RPL4 PE=2 SV=1	60S ribosomal protein L1 OS=Solanum tuberosum OX=4113 GN=102590167 PE=2 SV=1	A	RNA processing and modification	60S ribosomal protein L4-1-like [Solanum tuberosum]
SMEL4.1_10g020180.1	--	--	Molecular Function: UDP-glycosyltransferase activity (GO:0008194);	K13496|3.0e-244|sot:102603165|K13496 UDP-glucosyltransferase 73C [EC:2.4.1.-] | (RefSeq) UDP-glycosyltransferase 73C3-like	[GC]	--	UDP-glucoronosyl and UDP-glucosyl transferase	UDP-glycosyltransferase 73C3 OS=Arabidopsis thaliana OX=3702 GN=UGT73C3 PE=2 SV=1	Glycosyltransferase OS=Capsicum annuum OX=4072 GN=LOC107843377 PE=3 SV=1	--	--	PREDICTED: UDP-glycosyltransferase 73C3-like [Solanum tuberosum]
SMEL4.1_10g020190.1	[R]	General function prediction only	Molecular Function: serine-type endopeptidase activity (GO:0004252);; Cellular Component: integral component of membrane (GO:0016021);	K08653|0.0e+00|cann:107843362|K08653 membrane-bound transcription factor site-1 protease [EC:3.4.21.112] | (RefSeq) subtilisin-like protease SBT6.1	[O]	Posttranslational modification, protein turnover, chaperones	Subtilase family	Subtilisin-like protease SBT6.1 OS=Arabidopsis thaliana OX=3702 GN=SBT6.1 PE=1 SV=1	Subtilisin-like protease SBT6.1 OS=Capsicum baccatum OX=33114 GN=CQW23_24065 PE=3 SV=1	O	Posttranslational modification, protein turnover, chaperones	Subtilisin-like protease SBT6.1 [Capsicum baccatum]
SMEL4.1_10g020200.1	[J]	Translation, ribosomal structure and biogenesis	Molecular Function: structural constituent of ribosome (GO:0003735);; Biological Process: translation (GO:0006412);; Cellular Component: small ribosomal subunit (GO:0015935);	K02973|8.8e-75|cann:107873446|K02973 small subunit ribosomal protein S23e | (RefSeq) 40S ribosomal protein S23	[J]	Translation, ribosomal structure and biogenesis	Ribosomal protein S12/S23	40S ribosomal protein S23 OS=Fragaria ananassa OX=3747 GN=RPS23 PE=2 SV=1	40S ribosomal protein S23 OS=Nicotiana sylvestris OX=4096 GN=LOC104223004 PE=3 SV=1	J	Translation, ribosomal structure and biogenesis	uncharacterized protein LOC102577739 [Solanum tuberosum]
SMEL4.1_10g020210.1	--	--	Biological Process: microtubule cytoskeleton organization (GO:0000226);; Cellular Component: cellular_component (GO:0005575);; Cellular Component: intracellular (GO:0005622);; Cellular Component: obsolete cell (GO:0005623);; Cellular Component: nucleus (GO:0005634);; Cellular Component: cytoplasm (GO:0005737);; Cellular Component: cytoskeleton (GO:0005856);; Cellular Component: microtubule (GO:00…	--	--	--	--	Interactor of constitutive active ROPs 2, chloroplastic OS=Arabidopsis thaliana OX=3702 GN=ICR2 PE=1 SV=1	P70 protein OS=Solanum tuberosum OX=4113 GN=102589301 PE=3 SV=1	S	Function unknown	PREDICTED: interactor of constitutive active ROPs 2, chloroplastic-like isoform X2 [Solanum tuberosum]
SMEL4.1_10g020220.1	[K]	Transcription	Biological Process: regulation of oxidative phosphorylation (GO:0002082);; Cellular Component: cellular_component (GO:0005575);; Cellular Component: intracellular (GO:0005622);; Cellular Component: obsolete cell (GO:0005623);; Cellular Component: cytoplasm (GO:0005737);; Cellular Component: mitochondrion (GO:0005739);; Cellular Component: mitochondrial envelope (GO:0005740);; Cellular Component: …	K09539|4.7e-55|sot:102588984|K09539 DnaJ homolog subfamily C member 19 | (RefSeq) mitochondrial import inner membrane translocase subunit TIM14-1	[O]	Posttranslational modification, protein turnover, chaperones	--	Mitochondrial import inner membrane translocase subunit TIM14-1 OS=Arabidopsis thaliana OX=3702 GN=TIM14-1 PE=1 SV=1	Putative mitochondrial import inner membrane translocase subunit TIM14-1-like OS=Solanum chacoense OX=4108 PE=4 SV=1	O	Posttranslational modification, protein turnover, chaperones	PREDICTED: mitochondrial import inner membrane translocase subunit TIM14-1 [Solanum tuberosum]
SMEL4.1_10g020230.1	--	--	Biological Process: regulation of oxidative phosphorylation (GO:0002082);; Cellular Component: cellular_component (GO:0005575);; Cellular Component: intracellular (GO:0005622);; Cellular Component: obsolete cell (GO:0005623);; Cellular Component: cytoplasm (GO:0005737);; Cellular Component: mitochondrion (GO:0005739);; Cellular Component: mitochondrial envelope (GO:0005740);; Cellular Component: …	K09539|7.4e-13|nau:109226812|K09539 DnaJ homolog subfamily C member 19 | (RefSeq) mitochondrial import inner membrane translocase subunit TIM14-1-like	[O]	Posttranslational modification, protein turnover, chaperones	--	Mitochondrial import inner membrane translocase subunit TIM14-3 OS=Arabidopsis thaliana OX=3702 GN=TIM14-3 PE=1 SV=1	Mitochondrial import inner membrane translocase subunit TIM14-1 OS=Apostasia shenzhenica OX=1088818 GN=TIM14-1 PE=4 SV=1	O	Posttranslational modification, protein turnover, chaperones	DnaJ -like protein subfamily C member 15 [Salvia splendens]
SMEL4.1_10g020240.1	--	--	Molecular Function: molecular_function (GO:0003674);; Molecular Function: binding (GO:0005488);; Molecular Function: protein binding (GO:0005515);; Cellular Component: cellular_component (GO:0005575);; Cellular Component: intracellular (GO:0005622);; Cellular Component: obsolete cell (GO:0005623);; Cellular Component: nucleus (GO:0005634);; Cellular Component: cytoskeleton (GO:0005856);; Cellular…	--	--	--	--	Protein IQ-DOMAIN 1 OS=Arabidopsis thaliana OX=3702 GN=IQD1 PE=1 SV=1	Uncharacterized protein OS=Solanum chacoense OX=4108 PE=4 SV=1	Z	Cytoskeleton	PREDICTED: protein IQ-DOMAIN 1-like [Solanum tuberosum]
SMEL4.1_10g020250.1	--	--	Molecular Function: DNA binding (GO:0003677);; Cellular Component: nucleus (GO:0005634);; Biological Process: regulation of transcription, DNA-templated (GO:0006355);; Cellular Component: integral component of membrane (GO:0016021);	K10268|1.1e-19|mtr:MTR_7g100890|K10268 F-box and leucine-rich repeat protein 2/20 | (RefSeq) DNA-binding protein S1FA	--	--	DNA binding protein S1FA	DNA-binding protein S1FA OS=Spinacia oleracea OX=3562 GN=S1FA PE=3 SV=1	DNA-binding protein S1FA OS=Solanum tuberosum OX=4113 PE=3 SV=1	J	Translation, ribosomal structure and biogenesis	DNA-binding protein S1FA [Solanum lycopersicum]
SMEL4.1_10g020260.1	--	--	Molecular Function: protein binding (GO:0005515);; Biological Process: regulation of transcription, DNA-templated (GO:0006355);; Biological Process: cell communication (GO:0007154);; Biological Process: response to nutrient (GO:0007584);; Biological Process: biological_process (GO:0008150);; Biological Process: response to external stimulus (GO:0009605);; Biological Process: regulation of biosynt…	--	[R]	General function prediction only	WD domain, G-beta repeat	--	WD_REPEATS_REGION domain-containing protein OS=Solanum lycopersicum OX=4081 PE=4 SV=1	S	Function unknown	hypothetical protein EJD97_002138 [Solanum chilense]
SMEL4.1_10g020270.1	--	--	Biological Process: response to acid chemical (GO:0001101);; Molecular Function: molecular_function (GO:0003674);; Molecular Function: catalytic activity (GO:0003824);; Molecular Function: ubiquitin-protein transferase activity (GO:0004842);; Cellular Component: cellular_component (GO:0005575);; Cellular Component: intracellular (GO:0005622);; Cellular Component: obsolete cell (GO:0005623);; Cell…	K10604|4.3e-163|sot:102587358|K10604 E3 ubiquitin-protein ligase MGRN1 [EC:2.3.2.27] | (RefSeq) probable E3 ubiquitin-protein ligase LOG2	[O]	Posttranslational modification, protein turnover, chaperones	Zinc finger, C3HC4 type (RING finger)	Probable E3 ubiquitin-protein ligase LOG2 OS=Arabidopsis thaliana OX=3702 GN=LOG2 PE=1 SV=1	Putative E3 ubiquitin-protein ligase LOG2-like OS=Solanum chacoense OX=4108 PE=4 SV=1	O	Posttranslational modification, protein turnover, chaperones	PREDICTED: probable E3 ubiquitin-protein ligase LOG2 [Solanum tuberosum]
SMEL4.1_10g020280.1	--	--	Molecular Function: serine-type endopeptidase inhibitor activity (GO:0004867);; Biological Process: response to wounding (GO:0009611);	--	--	--	Potato inhibitor I family	Trypsin inhibitor 1 OS=Nicotiana sylvestris OX=4096 PE=2 SV=1	Proteinase inhibitor I-B OS=Solanum tuberosum OX=4113 PE=3 SV=1	--	--	PREDICTED: trypsin inhibitor 1-like [Capsicum annuum]
SMEL4.1_10g020290.1	--	--	Molecular Function: serine-type endopeptidase inhibitor activity (GO:0004867);; Biological Process: response to wounding (GO:0009611);	K20769|4.9e-08|mesc:110611169|K20769 fatty acid omega-hydroxylase [EC:1.14.-.-] | (RefSeq) cytochrome P450 94A2-like	--	--	Potato inhibitor I family	Trypsin inhibitor 1 OS=Nicotiana sylvestris OX=4096 PE=2 SV=1	Trypsin inhibitor 1 OS=Nicotiana attenuata OX=49451 GN=ITR1_1 PE=3 SV=1	S	Function unknown	PREDICTED: trypsin inhibitor 1 [Nicotiana attenuata]
SMEL4.1_10g020300.1	--	--	--	--	--	--	Senescence regulator	--	uncharacterized protein LOC107844905 OS=Capsicum annuum OX=4072 GN=LOC107844905 PE=4 SV=1	S	Function unknown	PREDICTED: uncharacterized protein LOC107844905 [Capsicum annuum]
SMEL4.1_10g020310.1	--	--	--	--	--	--	Prolamin-like	--	Uncharacterized protein OS=Solanum demissum OX=50514 GN=SDM1_32t00020 PE=4 SV=1	S	Function unknown	hypothetical protein SDM1_32t00020 [Solanum demissum]
SMEL4.1_10g020320.1	[I]	Lipid transport and metabolism	Molecular Function: transferase activity, transferring alkyl or aryl (other than methyl) groups (GO:0016765);	K11778|5.8e-127|spen:107031979|K11778 ditrans,polycis-polyprenyl diphosphate synthase [EC:2.5.1.87] | (RefSeq) dehydrodolichyl diphosphate synthase 2-like	[I]	Lipid transport and metabolism	Putative undecaprenyl diphosphate synthase	Dehydrodolichyl diphosphate synthase CPT5, chloroplastic OS=Solanum lycopersicum OX=4081 GN=CPT5 PE=1 SV=1	Alkyl transferase OS=Capsicum baccatum OX=33114 GN=CQW23_24327 PE=3 SV=1	I	Lipid transport and metabolism	dehydrodolichyl diphosphate synthase 2-like [Solanum pennellii]
SMEL4.1_10g020330.1	[I]	Lipid transport and metabolism	Molecular Function: transferase activity, transferring alkyl or aryl (other than methyl) groups (GO:0016765);	K11778|3.3e-151|sot:102581136|K11778 ditrans,polycis-polyprenyl diphosphate synthase [EC:2.5.1.87] | (RefSeq) dehydrodolichyl diphosphate synthase 2-like	[I]	Lipid transport and metabolism	Putative undecaprenyl diphosphate synthase	Cis-prenyltransferase 4, chloroplastic OS=Solanum lycopersicum OX=4081 GN=CPT4 PE=2 SV=1	Alkyl transferase OS=Solanum tuberosum OX=4113 GN=102581136 PE=3 SV=1	I	Lipid transport and metabolism	PREDICTED: dehydrodolichyl diphosphate synthase 2-like isoform X1 [Solanum tuberosum]
SMEL4.1_10g020340.1	--	--	--	K21805|5.7e-08|adu:107496164|K21805 protein N-lysine methyltransferase METTL21C [EC:2.1.1.-] | (RefSeq) protein-lysine methyltransferase METTL21B	--	--	Lysine methyltransferase	--	Uncharacterized protein OS=Solanum tuberosum OX=4113 GN=102580547 PE=4 SV=1	S	Function unknown	PREDICTED: protein N-methyltransferase NNT1 [Solanum tuberosum]
SMEL4.1_10g020350.1	[E]	Amino acid transport and metabolism	--	K23978|5.3e-87|cann:107844980|K23978 isoamyl acetate esterase [EC:3.1.1.112] | (RefSeq) GDSL esterase/lipase At2g38180-like	[I]	Lipid transport and metabolism	GDSL-like Lipase/Acylhydrolase family	GDSL esterase/lipase CPRD49 OS=Arabidopsis thaliana OX=3702 GN=CPRD49 PE=2 SV=1	GDSL esterase/lipase CPRD49 OS=Capsicum chinense OX=80379 GN=BC332_26135 PE=4 SV=1	I	Lipid transport and metabolism	PREDICTED: GDSL esterase/lipase At2g38180-like isoform X1 [Capsicum annuum]
SMEL4.1_10g020360.1	--	--	--	K23978|4.3e-101|sly:101257230|K23978 isoamyl acetate esterase [EC:3.1.1.112] | (RefSeq) GDSL esterase/lipase CPRD49-like	[I]	Lipid transport and metabolism	GDSL-like Lipase/Acylhydrolase family	GDSL esterase/lipase CPRD49 OS=Arabidopsis thaliana OX=3702 GN=CPRD49 PE=2 SV=1	CPRD49 OS=Solanum tuberosum OX=4113 GN=102595367 PE=4 SV=1	I	Lipid transport and metabolism	GDSL esterase/lipase CPRD49-like [Solanum lycopersicum]
SMEL4.1_10g020370.1	--	--	Biological Process: regulation of transcription, DNA-templated (GO:0006355);; Molecular Function: histone binding (GO:0042393);; Molecular Function: metal ion binding (GO:0046872);	K24083|1.4e-69|dzi:111284751|K24083 abhydrolase domain-containing protein 13 [EC:3.-.-.-] | (RefSeq) protein bem46-like isoform X1	[R]	General function prediction only	Alfin	PHD finger protein ALFIN-LIKE 1 OS=Arabidopsis thaliana OX=3702 GN=AL1 PE=1 SV=1	Phd/F-box containing protein OS=Solanum tuberosum OX=4113 GN=102580223 PE=3 SV=1	S	Function unknown	PREDICTED: PHD finger protein ALFIN-LIKE 1-like [Solanum tuberosum]
SMEL4.1_10g020380.1	[Q]	Secondary metabolites biosynthesis, transport and catabolism	Molecular Function: oxidoreductase activity (GO:0016491);; Molecular Function: metal ion binding (GO:0046872);	K05277|1.6e-61|nnu:104596229|K05277 anthocyanidin synthase [EC:1.14.20.4] | (RefSeq) leucoanthocyanidin dioxygenase-like	[QR]	--	2OG-Fe(II) oxygenase superfamily	Probable 2-oxoglutarate-dependent dioxygenase JRG21 OS=Arabidopsis thaliana OX=3702 GN=JRG21 PE=2 SV=1	Oxidoreductase OS=Solanum tuberosum OX=4113 GN=102579898 PE=3 SV=1	Q	Secondary metabolites biosynthesis, transport and catabolism	PREDICTED: protein SRG1-like [Solanum tuberosum]
SMEL4.1_10g020390.1	[J]	Translation, ribosomal structure and biogenesis	Molecular Function: structural constituent of ribosome (GO:0003735);; Biological Process: translation (GO:0006412);; Cellular Component: small ribosomal subunit (GO:0015935);	K02950|1.2e-49|cmos:111438394|K02950 small subunit ribosomal protein S12 | (RefSeq) uncharacterized protein LOC111438394	[J]	Translation, ribosomal structure and biogenesis	Ribosomal protein S12/S23	30S ribosomal protein S12-B, chloroplastic OS=Populus trichocarpa OX=3694 GN=rps12-B PE=3 SV=1	PREDICTED: ribosomal S12 OS=Prunus dulcis OX=3755 GN=ALMOND_2B032885 PE=3 SV=1	J	Translation, ribosomal structure and biogenesis	PREDICTED: ribosomal S12 [Prunus dulcis]
SMEL4.1_10g020400.1	[M]	Cell wall/membrane/envelope biogenesis	Molecular Function: protein kinase activity (GO:0004672);; Molecular Function: calcium ion binding (GO:0005509);; Molecular Function: ATP binding (GO:0005524);	K13412|2.3e-233|cann:107873402|K13412 calcium-dependent protein kinase [EC:2.7.11.1] | (RefSeq) calcium-dependent protein kinase 13	[T]	Signal transduction mechanisms	Protein kinase domain	Calcium-dependent protein kinase 13 OS=Arabidopsis thaliana OX=3702 GN=CPK13 PE=1 SV=2	Calcium-dependent protein kinase 7 OS=Capsicum chinense OX=80379 GN=BC332_26140 PE=4 SV=1	T	Signal transduction mechanisms	Calcium-dependent protein kinase 7 [Capsicum chinense]
SMEL4.1_10g020410.1	[T]	Signal transduction mechanisms	Molecular Function: protein kinase activity (GO:0004672);; Molecular Function: calcium ion binding (GO:0005509);; Molecular Function: ATP binding (GO:0005524);	K13412|8.4e-265|cann:107873402|K13412 calcium-dependent protein kinase [EC:2.7.11.1] | (RefSeq) calcium-dependent protein kinase 13	[T]	Signal transduction mechanisms	Protein kinase domain	Calcium-dependent protein kinase 13 OS=Arabidopsis thaliana OX=3702 GN=CPK13 PE=1 SV=2	Calcium-dependent protein kinase 7 OS=Capsicum chinense OX=80379 GN=BC332_26140 PE=4 SV=1	T	Signal transduction mechanisms	Calcium-dependent protein kinase 7 [Capsicum chinense]
SMEL4.1_10g020420.1	[I]	Lipid transport and metabolism	Molecular Function: acyl-CoA dehydrogenase activity (GO:0003995);; Molecular Function: flavin adenine dinucleotide binding (GO:0050660);	K00232|1.5e-235|sly:101250354|K00232 acyl-CoA oxidase [EC:1.3.3.6] | (RefSeq) acyl-coenzyme A oxidase 4, peroxisomal isoform X2	[E]	Amino acid transport and metabolism	Acyl-CoA dehydrogenase, middle domain	Acyl-coenzyme A oxidase 4, peroxisomal OS=Arabidopsis thaliana OX=3702 GN=ACX4 PE=1 SV=1	Acyl-CoA dehydrogenase OS=Solanum tuberosum OX=4113 GN=102579351 PE=3 SV=1	I	Lipid transport and metabolism	hypothetical protein EJD97_009178 [Solanum chilense]
SMEL4.1_10g020430.1	--	--	Biological Process: transcription, DNA-templated (GO:0006351);; Molecular Function: sequence-specific DNA binding (GO:0043565);	K14431|2.5e-06|zju:107412858|K14431 transcription factor TGA | (RefSeq) transcription factor TGA2.2	--	--	Seed dormancy control	Transcription factor LG2 OS=Oryza sativa subsp. japonica OX=39947 GN=LG2 PE=1 SV=1	transcription factor TGA6-like OS=Capsicum annuum OX=4072 GN=LOC107844967 PE=4 SV=1	S	Function unknown	PREDICTED: transcription factor TGA6-like [Capsicum annuum]
SMEL4.1_10g020440.1	--	--	--	K00031|7.0e-12|obr:102704611|K00031 isocitrate dehydrogenase [EC:1.1.1.42] | (RefSeq) isocitrate dehydrogenase [NADP]-like	--	--	--	--	Putative uvrABC system C-like OS=Solanum chacoense OX=4108 PE=4 SV=1	--	--	PREDICTED: uncharacterized protein LOC102578689 [Solanum tuberosum]
SMEL4.1_10g020450.1	--	--	Molecular Function: ATP transmembrane transporter activity (GO:0005347);; Cellular Component: integral component of membrane (GO:0016021);	K15100|2.6e-172|cann:107843439|K15100 solute carrier family 25 (mitochondrial citrate transporter), member 1 | (RefSeq) mitochondrial succinate-fumarate transporter 1	[C]	Energy production and conversion	Mitochondrial carrier protein	Mitochondrial succinate-fumarate transporter 1 OS=Arabidopsis thaliana OX=3702 GN=SFC1 PE=2 SV=1	Uncharacterized protein OS=Capsicum baccatum OX=33114 GN=CQW23_24258 PE=3 SV=1	C	Energy production and conversion	hypothetical protein CQW23_24258 [Capsicum baccatum]
SMEL4.1_10g020460.1	--	--	Cellular Component: membrane (GO:0016020);; Molecular Function: hydrolase activity, acting on glycosyl bonds (GO:0016798);	K07964|4.3e-271|spen:107032105|K07964 heparanase [EC:3.2.1.166] | (RefSeq) heparanase-like protein 3	--	--	Glycosyl hydrolase family 79, N-terminal domain	Heparanase-like protein 3 OS=Arabidopsis thaliana OX=3702 GN=At5g34940 PE=2 SV=2	Uncharacterized protein OS=Capsicum chinense OX=80379 GN=BC332_26078 PE=3 SV=1	U	Intracellular trafficking, secretion, and vesicular transport	heparanase-like protein 3 [Solanum pennellii]
SMEL4.1_10g020470.1	--	--	Molecular Function: UDP-glycosyltransferase activity (GO:0008194);	K13493|3.0e-90|brp:103846928|K13493 cytokinin-N-glucosyltransferase [EC:2.4.1.-] | (RefSeq) UDP-glycosyltransferase 76C2	[GC]	--	UDP-glucoronosyl and UDP-glucosyl transferase	UDP-glycosyltransferase 76E1 OS=Solanum lycopersicum OX=4081 GN=UGT76E1 PE=1 SV=1	Glycosyltransferase OS=Capsicum annuum OX=4072 GN=LOC107844971 PE=3 SV=1	--	--	UDP-glycosyltransferase 76E1 [Solanum lycopersicum]
SMEL4.1_10g020480.1	--	--	Molecular Function: UDP-glycosyltransferase activity (GO:0008194);	K13493|9.0e-19|bna:106432180|K13493 cytokinin-N-glucosyltransferase [EC:2.4.1.-] | (RefSeq) UDP-glycosyltransferase 76C2	[GC]	--	--	UDP-glycosyltransferase 76E1 OS=Solanum lycopersicum OX=4081 GN=UGT76E1 PE=1 SV=1	Uncharacterized protein OS=Solanum lycopersicum OX=4081 PE=3 SV=1	--	--	UDP-glycosyltransferase 76E1 [Solanum pennellii]
SMEL4.1_10g020490.1	--	--	Molecular Function: calcium ion binding (GO:0005509);; Molecular Function: calcium-dependent phospholipid binding (GO:0005544);	K17098|1.3e-140|sot:102596060|K17098 annexin D | (RefSeq) annexin-like protein RJ4	[U]	Intracellular trafficking, secretion, and vesicular transport	Annexin	Annexin-like protein RJ4 OS=Fragaria ananassa OX=3747 PE=2 SV=2	Annexin OS=Solanum lycopersicum OX=4081 GN=101244912 PE=3 SV=1	U	Intracellular trafficking, secretion, and vesicular transport	PREDICTED: annexin-like protein RJ4 [Solanum tuberosum]
SMEL4.1_10g020510.1	--	--	Molecular Function: UDP-glycosyltransferase activity (GO:0008194);	K23452|1.1e-112|eus:EUTSA_v10009957mg|K23452 UDP-glucosyltransferase 85A [EC:2.4.1.-] | (RefSeq) hypothetical protein	[GC]	--	UDP-glucoronosyl and UDP-glucosyl transferase	UDP-glycosyltransferase 76E1 OS=Solanum lycopersicum OX=4081 GN=UGT76E1 PE=1 SV=1	Uncharacterized protein OS=Solanum lycopersicum OX=4081 PE=3 SV=1	--	--	PREDICTED: UDP-glucose iridoid glucosyltransferase-like isoform X2 [Solanum tuberosum]
SMEL4.1_10g020520.1	--	--	Molecular Function: UDP-glycosyltransferase activity (GO:0008194);	K13493|9.4e-92|eus:EUTSA_v10013500mg|K13493 cytokinin-N-glucosyltransferase [EC:2.4.1.-] | (RefSeq) hypothetical protein	[GC]	--	UDP-glucoronosyl and UDP-glucosyl transferase	UDP-glycosyltransferase 76E1 OS=Solanum lycopersicum OX=4081 GN=UGT76E1 PE=1 SV=1	Uncharacterized protein OS=Solanum lycopersicum OX=4081 PE=3 SV=1	--	--	PREDICTED: UDP-glucose iridoid glucosyltransferase-like isoform X2 [Solanum tuberosum]
SMEL4.1_10g020530.1	--	--	Molecular Function: chaperone binding (GO:0051087);	--	[T]	Signal transduction mechanisms	BAG domain	BAG family molecular chaperone regulator 4 OS=Arabidopsis thaliana OX=3702 GN=BAG4 PE=1 SV=1	BCL-2 binding anthanogene-1 OS=Solanum tuberosum OX=4113 GN=102605123 PE=4 SV=1	T	Signal transduction mechanisms	PREDICTED: BAG family molecular chaperone regulator 4-like [Solanum tuberosum]
SMEL4.1_10g020540.1	--	--	Cellular Component: integral component of membrane (GO:0016021);	--	--	--	--	--	Uncharacterized protein OS=Solanum tuberosum OX=4113 PE=4 SV=1	--	--	--
SMEL4.1_10g020550.1	--	--	--	--	--	--	Protein of unknown function, DUF538	Uncharacterized protein At5g01610 OS=Arabidopsis thaliana OX=3702 GN=At5g01610 PE=1 SV=1	Putative ovule protein OS=Solanum chacoense OX=4108 PE=4 SV=1	S	Function unknown	PREDICTED: uncharacterized protein At5g01610-like [Solanum tuberosum]
SMEL4.1_10g020560.1	--	--	Biological Process: response to acid chemical (GO:0001101);; Molecular Function: molecular_function (GO:0003674);; Molecular Function: enzyme inhibitor activity (GO:0004857);; Molecular Function: protein phosphatase inhibitor activity (GO:0004864);; Molecular Function: binding (GO:0005488);; Molecular Function: protein binding (GO:0005515);; Cellular Component: cellular_component (GO:0005575);; C…	K14496|1.0e-106|sot:102604114|K14496 abscisic acid receptor PYR/PYL family | (RefSeq) abscisic acid receptor PYL4	--	--	Polyketide cyclase / dehydrase and lipid transport	Abscisic acid receptor PYL4 OS=Arabidopsis thaliana OX=3702 GN=PYL4 PE=1 SV=1	Abscisic acid receptor PYL4 OS=Solanum tuberosum OX=4113 GN=102604114 PE=3 SV=1	S	Function unknown	PREDICTED: abscisic acid receptor PYL4 [Solanum tuberosum]
SMEL4.1_10g020570.1	--	--	Cellular Component: integral component of membrane (GO:0016021);	K23877|7.6e-40|ath:AT1G70230|K23877 xyloglucan O-acetyltransferase | (RefSeq) TBL27; TRICHOME BIREFRINGENCE-LIKE 27	--	--	GDSL/SGNH-like Acyl-Esterase family found in Pmr5 and Cas1p	Protein trichome birefringence-like 35 OS=Arabidopsis thaliana OX=3702 GN=TBL35 PE=2 SV=1	PMR5N domain-containing protein OS=Solanum chacoense OX=4108 PE=3 SV=1	S	Function unknown	protein trichome birefringence-like 35 [Solanum pennellii]
SMEL4.1_10g020580.1	[V]	Defense mechanisms	Molecular Function: antiporter activity (GO:0015297);; Cellular Component: integral component of membrane (GO:0016021);; Molecular Function: xenobiotic transmembrane transporter activity (GO:0042910);	K20456|7.1e-99|smo:SELMODRAFT_417928|K20456 oxysterol-binding protein 1 | (RefSeq) hypothetical protein	[R]	General function prediction only	MatE	Protein DETOXIFICATION 44, chloroplastic OS=Arabidopsis thaliana OX=3702 GN=DTX44 PE=2 SV=1	Protein DETOXIFICATION OS=Capsicum annuum OX=4072 GN=LOC107843421 PE=3 SV=1	V	Defense mechanisms	PREDICTED: protein DETOXIFICATION 44, chloroplastic [Solanum tuberosum]
SMEL4.1_10g020590.1	--	--	Molecular Function: protein binding (GO:0005515);	K04079|3.5e-16|cann:107857923|K04079 molecular chaperone HtpG | (RefSeq) chaperone protein HtpG-like	--	--	Development and cell death domain	B2 protein OS=Daucus carota OX=4039 PE=2 SV=1	DCD domain-containing protein OS=Capsicum annuum OX=4072 GN=T459_25843 PE=4 SV=1	S	Function unknown	PREDICTED: uncharacterized protein LOC102594377 [Solanum tuberosum]
SMEL4.1_10g020600.1	--	--	--	K07253|1.5e-53|cann:107844958|K07253 phenylpyruvate tautomerase [EC:5.3.2.1] | (RefSeq) macrophage migration inhibitory factor homolog	[V]	Defense mechanisms	Macrophage migration inhibitory factor (MIF)	--	Uncharacterized protein OS=Capsicum chinense OX=80379 GN=BC332_26114 PE=3 SV=1	V	Defense mechanisms	PREDICTED: macrophage migration inhibitory factor homolog [Capsicum annuum]
SMEL4.1_10g020610.1	--	--	Molecular Function: nucleic acid binding (GO:0003676);; Molecular Function: zinc ion binding (GO:0008270);	--	--	--	--	--	Zinc finger containing preotein, putative OS=Solanum demissum OX=50514 GN=SDM1_53t00022 PE=4 SV=2	S	Function unknown	PREDICTED: uncharacterized protein LOC107062735 [Solanum tuberosum]
SMEL4.1_10g020620.1	[G]	Carbohydrate transport and metabolism	Molecular Function: hydrolase activity, hydrolyzing O-glycosyl compounds (GO:0004553);; Biological Process: carbohydrate metabolic process (GO:0005975);	K01193|1.8e-299|spen:107032409|K01193 beta-fructofuranosidase [EC:3.2.1.26] | (RefSeq) beta-fructofuranosidase, insoluble isoenzyme 1-like	[G]	Carbohydrate transport and metabolism	Glycosyl hydrolases family 32 N-terminal domain	Beta-fructofuranosidase, insoluble isoenzyme 1 OS=Daucus carota OX=4039 GN=INV1 PE=1 SV=1	Beta-fructosidase (Beta-fructofuranosidase) OS=Solanum tuberosum OX=4113 PE=3 SV=1	G	Carbohydrate transport and metabolism	beta-fructofuranosidase, insoluble isoenzyme 1-like [Solanum pennellii]
SMEL4.1_10g020630.1	--	--	Molecular Function: protein serine/threonine phosphatase activity (GO:0004722);	K17506|3.8e-23|eus:EUTSA_v10004184mg|K17506 protein phosphatase 1L [EC:3.1.3.16] | (RefSeq) hypothetical protein	[T]	Signal transduction mechanisms	Protein phosphatase 2C	Probable protein phosphatase 2C 65 OS=Arabidopsis thaliana OX=3702 GN=At5g01700 PE=2 SV=1	Protein phosphatase-2c OS=Solanum tuberosum OX=4113 PE=4 SV=1	T	Signal transduction mechanisms	putative protein phosphatase 2C 6 [Capsicum baccatum]
SMEL4.1_10g020640.1	[IQR]	--	--	K09841|2.1e-73|sbi:8057083|K09841 xanthoxin dehydrogenase [EC:1.1.1.288] | (RefSeq) zerumbone synthase	[R]	General function prediction only	Enoyl-(Acyl carrier protein) reductase	Short-chain dehydrogenase reductase 2a OS=Arabidopsis thaliana OX=3702 GN=SDR2a PE=3 SV=1	Short chain alcohol dehydrogenase OS=Solanum tuberosum OX=4113 GN=102602539 PE=4 SV=1	Q	Secondary metabolites biosynthesis, transport and catabolism	PREDICTED: short-chain dehydrogenase reductase 2a [Solanum tuberosum]
SMEL4.1_10g020650.1	[MR]	--	Molecular Function: ATP binding (GO:0005524);; Molecular Function: D-alanine-D-alanine ligase activity (GO:0008716);; Molecular Function: metal ion binding (GO:0046872);	--	--	--	D-ala D-ala ligase N-terminus	--	Uncharacterized protein OS=Solanum lycopersicum OX=4081 PE=4 SV=1	M	Cell wall/membrane/envelope biogenesis	uncharacterized protein LOC107032156 [Solanum pennellii]
SMEL4.1_10g020670.1	[E]	Amino acid transport and metabolism	Molecular Function: transaminase activity (GO:0008483);; Biological Process: biosynthetic process (GO:0009058);; Molecular Function: pyridoxal phosphate binding (GO:0030170);	K23977|3.8e-22|nau:109231973|K23977 L-glutamine---4-(methylsulfanyl)-2-oxobutanoate aminotransferase [EC:2.6.1.117] | (RefSeq) uncharacterized protein LOC109231973	--	--	--	--	methionine aminotransferase-like isoform X3 OS=Nicotiana tabacum OX=4097 GN=LOC107768050 PE=3 SV=1	E	Amino acid transport and metabolism	PREDICTED: uncharacterized protein LOC109231973 [Nicotiana attenuata]

## Sheet: Table S8
Table S8 Differential genes in transcriptome analysis of eggplant sepal colour
	baseMean	log2FoldChange	lfcSE	stat	pvalue	padj
SMEL4.1_00g000250.1.01	1512.94	-1.09435	0.300774	-3.63844	0.000274294	0.00284842
SMEL4.1_00g000390.1.01	109.9	-1.50471	0.279737	-5.37903	7.489e-08	2.55632e-06
SMEL4.1_00g001170.1.01	40.8547	-1.34029	0.365437	-3.66763	0.000244805	0.0026054
SMEL4.1_00g001750.1.01	451.335	-1.12106	0.26419	-4.24338	2.20181e-05	0.00035029
SMEL4.1_00g001760.1.01	26.4685	-1.91987	0.552637	-3.47402	0.000512723	0.00474464
SMEL4.1_00g001940.1.01	105.936	-1.98553	0.270601	-7.33749	2.17629e-13	2.24586e-11
SMEL4.1_00g002040.1.01	1894.06	-2.6759	0.502784	-5.32217	1.02534e-07	3.37633e-06
SMEL4.1_00g002220.1.01	3960.82	-1.35736	0.414131	-3.27761	0.00104691	0.00836515
SMEL4.1_00g002780.1.01	8.52651	-4.50866	1.2843	-3.51059	0.000447106	0.00423752
SMEL4.1_00g003380.1.01	45.1714	-2.0032	0.379107	-5.284	1.26391e-07	4.05223e-06
SMEL4.1_00g003450.1.01	130.254	-1.63406	0.248711	-6.57009	5.02839e-11	3.53369e-09
SMEL4.1_00g003460.1.01	17.0751	-2.8162	0.662753	-4.24925	2.14487e-05	0.000342882
SMEL4.1_00g003750.1.01	99.9506	-1.02678	0.241751	-4.24727	2.16389e-05	0.000345684
SMEL4.1_00g004060.1.01	6.11941	-4.99218	1.74138	-2.86679	0.00414653	0.0244643
SMEL4.1_00g004100.1.01	639.948	-1.11524	0.189902	-5.87274	4.28645e-09	1.93526e-07
SMEL4.1_00g004270.1.01	119.552	-1.61712	0.423667	-3.81695	0.000135111	0.00159185
SMEL4.1_00g004860.1.01	378.128	-1.18838	0.258907	-4.58999	4.43275e-06	9.07595e-05
SMEL4.1_00g007310.1.01	1370.48	-1.32598	0.32389	-4.09392	4.24137e-05	0.000611243
SMEL4.1_00g007650.1.01	325.882	-2.16779	0.755923	-2.86774	0.00413415	0.0244143
SMEL4.1_00g007980.1.01	2524.6	-1.25208	0.262294	-4.77358	1.80977e-06	4.29073e-05
SMEL4.1_00g008520.1.01	2070.44	-1.34319	0.431179	-3.11516	0.00183845	0.0129876
SMEL4.1_00g008970.1.01	28.3997	-1.46292	0.55847	-2.61952	0.00880533	0.0434737
SMEL4.1_00g009180.1.01	216.45	-2.4831	0.776106	-3.19944	0.00137697	0.0104053
SMEL4.1_00g011470.1.01	87.3732	-2.77284	0.309334	-8.96388	3.13458e-19	6.41229e-17
SMEL4.1_00g011530.1.01	15.6309	-4.88827	1.27918	-3.8214	0.000132695	0.00156658
SMEL4.1_00g011700.1.01	27.6803	-5.71145	0.943262	-6.055	1.40421e-09	7.10279e-08
SMEL4.1_00g011830.1.01	42.2878	-2.4302	0.882965	-2.75232	0.00591749	0.0320816
SMEL4.1_00g011890.1.01	21.5017	-2.14711	0.632956	-3.3922	0.000693333	0.0060434
SMEL4.1_00g011900.1.01	19.8562	-7.68551	1.27285	-6.03804	1.55999e-09	7.82226e-08
SMEL4.1_00g011910.1.01	121.439	-5.4131	0.599856	-9.02401	1.81333e-19	3.81064e-17
SMEL4.1_00g011970.1.01	59.3541	-5.17565	0.743433	-6.96183	3.35886e-12	2.92994e-10
SMEL4.1_00g011980.1.01	12.0975	-5.98504	1.49939	-3.99166	6.56134e-05	0.00087268
SMEL4.1_00g011990.1.01	255.846	-6.80498	0.764324	-8.90327	5.42248e-19	1.06226e-16
SMEL4.1_00g012000.1.01	21.4012	-5.33796	1.06708	-5.00241	5.66192e-07	1.56556e-05
SMEL4.1_00g012510.1.01	73.5137	-5.67754	0.613052	-9.2611	2.02328e-20	4.92317e-18
SMEL4.1_01g000260.1.01	17.6127	-1.91978	0.618886	-3.102	0.00192216	0.013465
SMEL4.1_01g000650.1.01	1425.93	-1.27225	0.381973	-3.33072	0.000866216	0.00722086
SMEL4.1_01g000670.1.01	972.663	-1.02186	0.397424	-2.5712	0.0101346	0.0483066
SMEL4.1_01g000790.1.01	448.795	-2.46265	0.547033	-4.50184	6.73684e-06	0.000128277
SMEL4.1_01g000800.1.01	62.0395	-3.92688	0.455029	-8.62997	6.13703e-18	1.09126e-15
SMEL4.1_01g000880.1.01	867.085	-1.57788	0.275153	-5.73455	9.77713e-09	4.10924e-07
SMEL4.1_01g001050.1.01	386.867	-1.53806	0.412496	-3.72866	0.000192502	0.00213629
SMEL4.1_01g001110.1.01	6096.25	-2.07407	0.381616	-5.43495	5.48117e-08	1.95529e-06
SMEL4.1_01g001540.1.01	912.506	-1.74409	0.525176	-3.32097	0.000897049	0.00743232
SMEL4.1_01g001940.1.01	363.592	-1.00551	0.294267	-3.41699	0.000633186	0.00560581
SMEL4.1_01g001950.1.01	201.873	-1.26578	0.346151	-3.65673	0.000255449	0.00268774
SMEL4.1_01g002020.1.01	599.768	-1.30686	0.329852	-3.96195	7.4341e-05	0.000969789
SMEL4.1_01g002550.1.01	1184.85	-1.19631	0.442597	-2.70293	0.00687317	0.0359783
SMEL4.1_01g002830.1.01	375.277	-1.93128	0.308639	-6.2574	3.91453e-10	2.27979e-08
SMEL4.1_01g002860.1.01	73.5435	-1.29253	0.480341	-2.69086	0.00712677	0.0369613
SMEL4.1_01g003020.1.01	19651.4	-1.87171	0.495238	-3.77942	0.000157194	0.00180691
SMEL4.1_01g003170.1.01	831.662	-1.0924	0.378299	-2.88767	0.00388112	0.0232468
SMEL4.1_01g003580.1.01	31.3153	-1.70234	0.44709	-3.80759	0.000140326	0.00163909
SMEL4.1_01g004240.1.01	1718.25	-1.60279	0.469813	-3.41154	0.000645966	0.00569495
SMEL4.1_01g004530.1.01	551.171	-1.01124	0.322967	-3.1311	0.00174155	0.0124946
SMEL4.1_01g004680.1.01	1258.93	-1.46047	0.525766	-2.7778	0.00547282	0.0301933
SMEL4.1_01g004840.1.01	5.43253	-5.81522	1.59822	-3.63857	0.000274161	0.00284831
SMEL4.1_01g005090.1.01	288.746	-2.44251	0.527141	-4.63351	3.59518e-06	7.62442e-05
SMEL4.1_01g005110.1.01	1737.62	-2.36303	0.541689	-4.36235	1.28673e-05	0.000224314
SMEL4.1_01g005260.1.01	39.077	-3.77821	0.76066	-4.96702	6.79895e-07	1.82537e-05
SMEL4.1_01g005520.1.01	2120.98	-2.36382	0.479877	-4.92588	8.39804e-07	2.20101e-05
SMEL4.1_01g005580.1.01	226.225	-6.625	0.72193	-9.17678	4.44167e-20	1.02674e-17
SMEL4.1_01g005670.1.01	180.06	-3.12186	0.359052	-8.69475	3.47604e-18	6.37716e-16
SMEL4.1_01g005810.1.01	135.513	-1.0979	0.334842	-3.27884	0.00104234	0.00833653
SMEL4.1_01g005820.1.01	2006.33	-1.58273	0.511839	-3.09224	0.00198655	0.0137694
SMEL4.1_01g005830.1.01	889.422	-1.57064	0.329942	-4.76034	1.93264e-06	4.50029e-05
SMEL4.1_01g005960.1.01	18.3589	-7.57518	1.66113	-4.56026	5.10911e-06	0.000101812
SMEL4.1_01g006060.1.01	27.9002	-2.3237	0.793361	-2.92894	0.00340124	0.020955
SMEL4.1_01g006150.1.01	55.0317	-5.96869	0.734774	-8.12316	4.54209e-16	6.64526e-14
SMEL4.1_01g006340.1.01	283.261	-1.89497	0.297277	-6.37443	1.8364e-10	1.14113e-08
SMEL4.1_01g006470.1.01	2731.54	-2.66189	0.508131	-5.23858	1.61814e-07	5.00735e-06
SMEL4.1_01g006490.1.01	78.527	-1.37592	0.534896	-2.57231	0.0101021	0.0481795
SMEL4.1_01g007480.1.01	479.582	-2.54787	0.372412	-6.84154	7.8346e-12	6.37692e-10
SMEL4.1_01g007590.1.01	2379.66	-1.13892	0.195504	-5.82553	5.69328e-09	2.48313e-07
SMEL4.1_01g007650.1.01	720.924	-1.17075	0.22744	-5.1475	2.63977e-07	7.82319e-06
SMEL4.1_01g007670.1.01	1508.72	-1.93041	0.455124	-4.24151	2.22017e-05	0.000352967
SMEL4.1_01g008050.1.01	133.549	-2.30644	0.626946	-3.67885	0.000234286	0.00251662
SMEL4.1_01g008530.1.01	157.006	-6.80836	0.68262	-9.97387	1.98356e-23	6.1136e-21
SMEL4.1_01g008540.1.01	158.838	-2.19924	0.758264	-2.90036	0.00372738	0.0224556
SMEL4.1_01g008550.1.01	253.986	-1.65062	0.555119	-2.97345	0.00294474	0.0187367
SMEL4.1_01g009000.1.01	2294.54	-2.07795	0.41122	-5.05314	4.34607e-07	1.2342e-05
SMEL4.1_01g009030.1.01	1345.2	-1.46137	0.282087	-5.18057	2.21207e-07	6.67549e-06
SMEL4.1_01g009120.1.01	357.928	-2.10066	0.327838	-6.40763	1.47804e-10	9.33506e-09
SMEL4.1_01g009230.1.01	69.3156	-3.12369	0.968804	-3.22428	0.0012629	0.00968586
SMEL4.1_01g009360.1.01	22.2642	-2.45214	0.758771	-3.23172	0.00123047	0.00951569
SMEL4.1_01g009410.1.01	3227.75	-6.32523	0.405818	-15.5864	9.01302e-55	1.15747e-51
SMEL4.1_01g009450.1.01	54.7943	-1.58828	0.542132	-2.92968	0.00339308	0.0209214
SMEL4.1_01g009560.1.01	1697.66	-2.34723	0.388614	-6.04002	1.54099e-09	7.74383e-08
SMEL4.1_01g009660.1.01	42.2149	-1.31862	0.416444	-3.16637	0.00154354	0.011378
SMEL4.1_01g009870.1.01	130.657	-1.66594	0.543316	-3.06625	0.00216762	0.014733
SMEL4.1_01g010240.1.01	305.917	-3.52744	0.552817	-6.38084	1.76117e-10	1.10328e-08
SMEL4.1_01g010360.1.01	500.479	-1.21495	0.458447	-2.65015	0.00804555	0.040581
SMEL4.1_01g011080.1.01	3646.69	-1.87676	0.461772	-4.06426	4.81843e-05	0.000682075
SMEL4.1_01g011210.1.01	117.972	-2.09821	0.624571	-3.35945	0.000780985	0.00663235
SMEL4.1_01g011280.1.01	88.4999	-1.02204	0.377214	-2.70946	0.00673936	0.0354706
SMEL4.1_01g011290.1.01	39.8269	-2.40664	0.491213	-4.89939	9.61352e-07	2.4637e-05
SMEL4.1_01g011350.1.01	19.6137	-1.72696	0.517041	-3.34009	0.000837504	0.00702162
SMEL4.1_01g011640.1.01	26.7236	-1.57195	0.478545	-3.28485	0.00102037	0.00819274
SMEL4.1_01g011690.1.01	116.448	-1.34633	0.513743	-2.62063	0.00877671	0.043352
SMEL4.1_01g011710.1.01	5894.05	-1.64061	0.489922	-3.34872	0.000811862	0.00684677
SMEL4.1_01g012350.1.01	2080.52	-1.46017	0.460692	-3.16953	0.00152688	0.0113018
SMEL4.1_01g012470.1.01	517.518	-1.72361	0.340695	-5.05908	4.21277e-07	1.20046e-05
SMEL4.1_01g012480.1.01	45.7095	-2.80858	0.722535	-3.88712	0.000101443	0.00125869
SMEL4.1_01g012500.1.01	87.5087	-1.77981	0.410311	-4.33771	1.43973e-05	0.000245253
SMEL4.1_01g012520.1.01	7017.66	-1.16902	0.337773	-3.46097	0.000538238	0.00492358
SMEL4.1_01g012570.1.01	21.8592	-2.50731	0.8068	-3.10772	0.00188536	0.0132549
SMEL4.1_01g012640.1.01	65.2135	-1.89052	0.435763	-4.33842	1.43511e-05	0.000244646
SMEL4.1_01g012910.1.01	3105.96	-3.23481	0.268121	-12.0647	1.62169e-33	8.7179e-31
SMEL4.1_01g013010.1.01	165.538	-2.8363	0.518947	-5.46549	4.61624e-08	1.66994e-06
SMEL4.1_01g013040.1.01	1086.4	-1.58865	0.331062	-4.79866	1.59734e-06	3.83826e-05
SMEL4.1_01g013320.1.01	4.2068	-5.4529	1.86212	-2.92833	0.00340784	0.0209788
SMEL4.1_01g013630.1.01	91.4839	-1.42239	0.258115	-5.51067	3.57474e-08	1.32986e-06
SMEL4.1_01g013640.1.01	88.0579	-1.10073	0.251093	-4.38377	1.16641e-05	0.000206799
SMEL4.1_01g013740.1.01	317.071	-1.94709	0.423647	-4.59603	4.30625e-06	8.86405e-05
SMEL4.1_01g013770.1.01	6.428	-5.06143	1.45597	-3.47634	0.00050831	0.00470945
SMEL4.1_01g013790.1.01	746.125	-2.03767	0.457269	-4.45618	8.34326e-06	0.000155212
SMEL4.1_01g014140.1.01	10.2084	-4.76038	1.50014	-3.1733	0.00150719	0.0112027
SMEL4.1_01g014180.1.01	532.13	-2.50582	0.435196	-5.7579	8.51643e-09	3.61886e-07
SMEL4.1_01g014340.1.01	519.171	-1.96154	0.424448	-4.62138	3.81191e-06	8.01056e-05
SMEL4.1_01g014430.1.01	240.785	-1.25974	0.431888	-2.91681	0.00353627	0.0215747
SMEL4.1_01g014500.1.01	623.459	-4.0978	0.568849	-7.20367	5.8612e-13	5.81492e-11
SMEL4.1_01g014690.1.01	192.087	-1.88123	0.406037	-4.63316	3.60122e-06	7.63023e-05
SMEL4.1_01g014750.1.01	8.39451	-6.4484	1.6855	-3.82581	0.000130345	0.00154357
SMEL4.1_01g014770.1.01	886.366	-1.69051	0.302437	-5.58963	2.27549e-08	8.99151e-07
SMEL4.1_01g014810.1.01	8069.75	-1.58599	0.558232	-2.84109	0.00449594	0.0260733
SMEL4.1_01g015030.1.01	1042.22	-1.02394	0.373919	-2.73839	0.00617399	0.0331517
SMEL4.1_01g015180.1.01	1870.3	-1.10261	0.347371	-3.17415	0.00150274	0.0111753
SMEL4.1_01g015320.1.01	12.4714	-1.9441	0.697656	-2.78662	0.00532608	0.029553
SMEL4.1_01g015720.1.01	5.84009	-2.89469	1.12416	-2.57498	0.0100246	0.0478945
SMEL4.1_01g015840.1.01	54.7433	-1.98353	0.546566	-3.62907	0.000284441	0.00292358
SMEL4.1_01g016510.1.01	38.8647	-4.31506	0.995633	-4.33399	1.46433e-05	0.000249077
SMEL4.1_01g016630.1.01	57.826	-2.35828	0.623057	-3.78502	0.000153699	0.00176938
SMEL4.1_01g016680.1.01	275.705	-1.80701	0.669893	-2.69746	0.00698706	0.036426
SMEL4.1_01g017020.1.01	238.793	-1.25866	0.36422	-3.45576	0.000548737	0.00500182
SMEL4.1_01g017040.1.01	97.284	-2.15312	0.322491	-6.67654	2.4465e-11	1.83021e-09
SMEL4.1_01g018110.1.01	19.8746	-6.70995	1.57253	-4.26698	1.98133e-05	0.000320957
SMEL4.1_01g018360.1.01	243.871	-2.31714	0.527009	-4.39677	1.09874e-05	0.000197654
SMEL4.1_01g018720.1.01	919.544	-2.27204	0.734168	-3.09472	0.00197	0.0136999
SMEL4.1_01g019160.1.01	2955.97	-1.51771	0.425485	-3.56702	0.000361061	0.00356223
SMEL4.1_01g019230.1.01	2238.74	-1.30233	0.413284	-3.15116	0.00162621	0.0118435
SMEL4.1_01g019340.1.01	15.4168	-1.68873	0.612444	-2.75736	0.00582702	0.0317309
SMEL4.1_01g019460.1.01	86.0946	-1.61057	0.499277	-3.22581	0.00125616	0.0096534
SMEL4.1_01g019910.1.01	121.124	-3.20455	0.580369	-5.52157	3.35977e-08	1.27111e-06
SMEL4.1_01g020240.1.01	836.091	-1.55604	0.394657	-3.94277	8.05473e-05	0.00103787
SMEL4.1_01g020300.1.01	36.5833	-5.37254	0.824341	-6.51738	7.15472e-11	4.8501e-09
SMEL4.1_01g020310.1.01	87.0582	-6.63204	0.740328	-8.95825	3.29886e-19	6.68915e-17
SMEL4.1_01g020320.1.01	487.607	-4.61959	0.427352	-10.8098	3.09315e-27	1.15325e-24
SMEL4.1_01g020330.1.01	141.807	-2.88278	0.416167	-6.92699	4.29893e-12	3.65346e-10
SMEL4.1_01g020350.1.01	667.99	-3.29609	0.820494	-4.0172	5.88927e-05	0.000802218
SMEL4.1_01g020420.1.01	13.1697	-2.72834	0.719641	-3.79125	0.000149891	0.00173158
SMEL4.1_01g020510.1.01	68.9606	-2.00081	0.611224	-3.27344	0.00106245	0.00845136
SMEL4.1_01g020840.1.01	1149.84	-2.38744	0.481014	-4.96335	6.9288e-07	1.85808e-05
SMEL4.1_01g020910.1.01	850.11	-2.64065	0.419488	-6.29493	3.07548e-10	1.84656e-08
SMEL4.1_01g021080.1.01	4.87873	-4.64388	1.46696	-3.16565	0.00154739	0.0113954
SMEL4.1_01g021170.1.01	22.9173	-2.4302	0.823499	-2.95107	0.00316678	0.0198168
SMEL4.1_01g021200.1.01	673.053	-2.26569	0.434128	-5.21895	1.79943e-07	5.53133e-06
SMEL4.1_01g022040.1.01	640.892	-2.45448	0.419465	-5.85144	4.8733e-09	2.14983e-07
SMEL4.1_01g022640.1.01	289.424	-1.56956	0.425755	-3.68653	0.000227333	0.00245916
SMEL4.1_01g023060.1.01	1454.96	-1.32691	0.424921	-3.12273	0.00179182	0.0127523
SMEL4.1_01g023140.1.01	513.257	-2.6407	0.404784	-6.52374	6.85765e-11	4.6624e-09
SMEL4.1_01g023230.1.01	109.22	-3.51304	0.708412	-4.95904	7.08429e-07	1.88954e-05
SMEL4.1_01g023420.1.01	25.5169	-6.19696	1.5194	-4.07856	4.5315e-05	0.000645013
SMEL4.1_01g023430.1.01	4312.58	-3.1931	0.631575	-5.05577	4.28667e-07	1.21883e-05
SMEL4.1_01g023530.1.01	3613.25	-1.01118	0.362808	-2.7871	0.0053182	0.0295517
SMEL4.1_01g023790.1.01	20.067	-2.08291	0.59833	-3.48121	0.000499153	0.0046339
SMEL4.1_01g023960.1.01	131.8	-1.43721	0.40253	-3.57045	0.000356369	0.00352496
SMEL4.1_01g024090.1.01	1296.2	-2.17989	0.365332	-5.96688	2.41826e-09	1.15497e-07
SMEL4.1_01g024130.1.01	81.2036	-1.90383	0.627648	-3.03328	0.00241914	0.0160648
SMEL4.1_01g024320.1.01	154.489	-2.63592	0.479176	-5.50094	3.77766e-08	1.39078e-06
SMEL4.1_01g024330.1.01	8.03095	-6.37943	1.67695	-3.8042	0.000142266	0.00165645
SMEL4.1_01g024870.1.01	126.385	-2.2767	0.652805	-3.48757	0.00048743	0.00454332
SMEL4.1_01g025230.1.01	75.4328	-3.47669	0.572286	-6.0751	1.23911e-09	6.37936e-08
SMEL4.1_01g025290.1.01	2778.18	-2.49728	0.633509	-3.94199	8.08096e-05	0.00103913
SMEL4.1_01g025780.1.01	609.957	-1.06808	0.213665	-4.99885	5.76727e-07	1.58899e-05
SMEL4.1_01g026440.1.01	3861.6	-1.28673	0.373525	-3.44483	0.000571413	0.00516573
SMEL4.1_01g026490.1.01	164.247	-2.25576	0.751304	-3.00247	0.00267802	0.0174351
SMEL4.1_01g026730.1.01	1375.65	-1.29964	0.293686	-4.42526	9.63262e-06	0.00017672
SMEL4.1_01g026850.1.01	521.45	-1.30251	0.457751	-2.84545	0.00443491	0.025784
SMEL4.1_01g027260.1.01	6.94163	-6.16634	1.69874	-3.62995	0.000283474	0.00291623
SMEL4.1_01g028200.1.01	109.676	-2.40025	0.382226	-6.27966	3.39317e-10	2.02156e-08
SMEL4.1_01g028210.1.01	1048.92	-1.71879	0.462125	-3.71932	0.000199762	0.00220626
SMEL4.1_01g028680.1.01	3057.82	-1.696	0.488372	-3.47277	0.000515121	0.00476111
SMEL4.1_01g028780.1.01	952.764	-7.90572	0.44092	-17.9301	6.8685e-72	1.98465e-68
SMEL4.1_01g029050.1.01	332.178	-2.56705	0.235926	-10.8808	1.42339e-27	5.48385e-25
SMEL4.1_01g029060.1.01	58.4286	-1.06295	0.362535	-2.93199	0.00336794	0.0208108
SMEL4.1_01g029660.1.01	94.0562	-2.80969	0.64161	-4.37912	1.19157e-05	0.000210262
SMEL4.1_01g030250.1.01	802.366	-1.04555	0.32527	-3.2144	0.00130718	0.0099857
SMEL4.1_01g030440.1.01	297.631	-1.25086	0.412583	-3.03177	0.00243122	0.0161263
SMEL4.1_01g031140.1.01	513.895	-1.5442	0.3237	-4.77045	1.83813e-06	4.35072e-05
SMEL4.1_01g031830.1.01	321.36	-4.04211	0.318515	-12.6905	6.67531e-37	4.0607e-34
SMEL4.1_01g033460.1.01	1444.75	-1.48062	0.361635	-4.09425	4.23545e-05	0.000610772
SMEL4.1_01g033630.1.01	3.49007	-5.17746	1.74643	-2.96459	0.00303082	0.0191667
SMEL4.1_01g034280.1.01	185.479	-1.84055	0.500081	-3.68051	0.000232771	0.0025015
SMEL4.1_01g034400.1.01	70.8863	-3.65885	0.632074	-5.78864	7.09567e-09	3.06586e-07
SMEL4.1_01g034970.1.01	9.50672	-2.77542	1.07489	-2.58204	0.00982174	0.0471329
SMEL4.1_01g035210.1.01	812.916	-1.25417	0.330858	-3.79067	0.00015024	0.00173387
SMEL4.1_01g035220.1.01	44.4928	-7.01035	1.50999	-4.64265	3.43965e-06	7.35531e-05
SMEL4.1_01g036070.1.01	97.9039	-1.4155	0.361369	-3.91706	8.96361e-05	0.00113226
SMEL4.1_01g036100.1.01	641.806	-2.62488	0.759511	-3.45601	0.00054824	0.00499925
SMEL4.1_01g036170.1.01	1096.89	-1.18509	0.284059	-4.17198	3.01959e-05	0.00045741
SMEL4.1_01g036210.1.01	244.843	-1.27509	0.24748	-5.15229	2.57329e-07	7.65562e-06
SMEL4.1_01g036230.1.01	24.7071	-8.00066	1.49187	-5.36283	8.19282e-08	2.77225e-06
SMEL4.1_01g036390.1.01	29.0922	-2.69495	0.858293	-3.1399	0.00169006	0.0121819
SMEL4.1_01g036400.1.01	67.2871	-5.22476	0.773782	-6.75224	1.4558e-11	1.12549e-09
SMEL4.1_01g036460.1.01	151.616	-9.65554	1.51393	-6.37778	1.79671e-10	1.1225e-08
SMEL4.1_01g036490.1.01	233.36	-11.2419	1.24829	-9.00587	2.13967e-19	4.41612e-17
SMEL4.1_01g036510.1.01	166.017	-6.25143	0.849412	-7.35972	1.84303e-13	1.91907e-11
SMEL4.1_01g036580.1.01	3147.88	-5.67173	0.275621	-20.578	4.32452e-94	3.33219e-90
SMEL4.1_01g036590.1.01	176.75	-4.78715	0.707605	-6.76529	1.33045e-11	1.04071e-09
SMEL4.1_01g036610.1.01	206.49	-3.08145	0.310921	-9.91074	3.73862e-23	1.12236e-20
SMEL4.1_01g036730.1.01	2978.84	-1.00566	0.316997	-3.17245	0.0015116	0.0112282
SMEL4.1_01g037000.1.01	100.609	-1.22446	0.249404	-4.90953	9.12935e-07	2.3632e-05
SMEL4.1_01g037070.1.01	147.727	-2.9523	0.842166	-3.5056	0.000455573	0.00429661
SMEL4.1_01g037140.1.01	158.573	-1.57943	0.492702	-3.20565	0.00134756	0.0102333
SMEL4.1_01g037190.1.01	387.879	-2.24222	0.568487	-3.94419	8.00711e-05	0.00103404
SMEL4.1_01g037460.1.01	679.614	-2.09028	0.443143	-4.71694	2.39415e-06	5.42048e-05
SMEL4.1_01g037530.1.01	126.61	-1.39315	0.424697	-3.28033	0.00103687	0.00829923
SMEL4.1_01g037840.1.01	201.2	-2.62365	0.438305	-5.98589	2.15207e-09	1.04292e-07
SMEL4.1_01g037900.1.01	1106.4	-1.23832	0.356291	-3.4756	0.000509707	0.0047205
SMEL4.1_01g037920.1.01	48.6972	-2.94708	0.556275	-5.29787	1.17159e-07	3.77541e-06
SMEL4.1_01g037970.1.01	1417.1	-1.13951	0.279701	-4.07403	4.62067e-05	0.000656897
SMEL4.1_01g038030.1.01	114.019	-2.2837	0.423148	-5.39693	6.77913e-08	2.34942e-06
SMEL4.1_01g038660.1.01	139.677	-2.3756	0.379648	-6.25736	3.91537e-10	2.27979e-08
SMEL4.1_01g038670.1.01	4634.18	-2.7205	0.452318	-6.01457	1.80367e-09	8.91232e-08
SMEL4.1_01g038690.1.01	417.033	-1.67211	0.313537	-5.33306	9.65703e-08	3.21197e-06
SMEL4.1_02g000180.1.01	238.458	-1.36177	0.528117	-2.57854	0.00992182	0.0474949
SMEL4.1_02g003090.1.01	60.5649	-1.50668	0.583038	-2.5842	0.00976064	0.0469176
SMEL4.1_02g003570.1.01	842.245	-2.70466	0.666841	-4.05593	4.99362e-05	0.000700865
SMEL4.1_02g005300.1.01	26.8112	-6.25703	1.15225	-5.4303	5.62601e-08	1.99639e-06
SMEL4.1_02g005490.1.01	1257.13	-1.0195	0.287193	-3.54989	0.000385386	0.00376366
SMEL4.1_02g005560.1.01	37.7711	-1.66605	0.546355	-3.04939	0.00229306	0.0153954
SMEL4.1_02g005840.1.01	164.58	-1.67722	0.497679	-3.37008	0.000751473	0.0064242
SMEL4.1_02g005860.1.01	1296.35	-1.05232	0.348549	-3.01915	0.00253485	0.0166844
SMEL4.1_02g006040.1.01	638.065	-2.35793	0.628921	-3.74916	0.000177426	0.00199096
SMEL4.1_02g006200.1.01	10.0401	-2.63643	0.815469	-3.23302	0.00122488	0.00947921
SMEL4.1_02g006430.1.01	75.3655	-1.03827	0.286449	-3.62462	0.000289388	0.00296127
SMEL4.1_02g006470.1.01	394.379	-1.44678	0.385951	-3.74861	0.000177817	0.00199438
SMEL4.1_02g006480.1.01	127.52	-10.3691	1.37621	-7.53453	4.90113e-14	5.58101e-12
SMEL4.1_02g006570.1.01	5.99304	-5.95867	1.44523	-4.12299	3.7399e-05	0.000549596
SMEL4.1_02g006900.1.01	63.0367	-2.06054	0.376782	-5.46879	4.53127e-08	1.64177e-06
SMEL4.1_02g007080.1.01	146.55	-2.13074	0.432788	-4.92328	8.51073e-07	2.22802e-05
SMEL4.1_02g007160.1.01	363.059	-4.17047	0.498576	-8.36477	6.02322e-17	9.66895e-15
SMEL4.1_02g007710.1.01	25.0319	-1.28317	0.42235	-3.03816	0.00238031	0.0158614
SMEL4.1_02g007750.1.01	380.651	-4.08883	0.691177	-5.91575	3.3036e-09	1.53654e-07
SMEL4.1_02g007830.1.01	1070.07	-2.15454	0.459288	-4.69104	2.71819e-06	6.03011e-05
SMEL4.1_02g007900.1.01	63.3436	-1.45291	0.389055	-3.73447	0.00018811	0.0020966
SMEL4.1_02g008210.1.01	1197.31	-1.03595	0.311102	-3.32994	0.000868661	0.00723776
SMEL4.1_02g008510.1.01	36.068	-4.48752	0.992869	-4.51975	6.19122e-06	0.000119662
SMEL4.1_02g008660.1.01	62.5108	-3.65334	0.600663	-6.08218	1.18557e-09	6.13103e-08
SMEL4.1_02g008740.1.01	232.473	-1.52446	0.529601	-2.87851	0.00399565	0.0237621
SMEL4.1_02g009810.1.01	44.9951	-2.02714	0.760021	-2.66722	0.00764814	0.0391051
SMEL4.1_02g010120.1.01	398.174	-1.46723	0.572359	-2.56347	0.0103631	0.0490334
SMEL4.1_02g010400.1.01	4997.17	-2.09527	0.647293	-3.23697	0.00120807	0.00939309
SMEL4.1_02g010440.1.01	2195.39	-2.25508	0.348568	-6.46954	9.83015e-11	6.4555e-09
SMEL4.1_02g010630.1.01	20.1832	-2.10517	0.591547	-3.55875	0.000372622	0.00366411
SMEL4.1_02g010780.1.01	47.0806	-5.17146	1.04447	-4.9513	7.37211e-07	1.95878e-05
SMEL4.1_02g011200.1.01	250.331	-1.21915	0.35023	-3.481	0.000499545	0.00463568
SMEL4.1_02g011370.1.01	18.8886	-2.42441	0.58049	-4.17649	2.96038e-05	0.000450508
SMEL4.1_02g011450.1.01	82.5196	-1.15017	0.246507	-4.66587	3.07313e-06	6.68912e-05
SMEL4.1_02g011510.1.01	461.211	-1.22727	0.385005	-3.18767	0.00143422	0.0107466
SMEL4.1_02g011580.1.01	48.4525	-2.22232	0.703671	-3.15818	0.00158755	0.0116243
SMEL4.1_02g011660.1.01	1173.2	-2.52556	0.364318	-6.93228	4.1411e-12	3.58482e-10
SMEL4.1_02g011700.1.01	2255.45	-1.32888	0.261761	-5.0767	3.84044e-07	1.10359e-05
SMEL4.1_02g011770.1.01	101.499	-3.08049	0.900655	-3.42027	0.00062558	0.00555761
SMEL4.1_02g011800.1.01	135.707	-1.90879	0.580907	-3.28588	0.00101666	0.00817998
SMEL4.1_02g011810.1.01	55.0362	-2.28611	0.336788	-6.78799	1.13707e-11	9.00153e-10
SMEL4.1_02g011870.1.01	509.373	-1.33212	0.438143	-3.04038	0.0023628	0.0157902
SMEL4.1_02g012010.1.01	68.5987	-2.17791	0.416742	-5.22605	1.7317e-07	5.33021e-06
SMEL4.1_02g012040.1.01	415.678	-1.02234	0.374758	-2.72801	0.00637178	0.0339926
SMEL4.1_02g012050.1.01	152.643	-1.53526	0.456812	-3.36081	0.00077715	0.00660706
SMEL4.1_02g012330.1.01	348.112	-2.84745	0.757802	-3.75751	0.000171614	0.00193986
SMEL4.1_02g012340.1.01	1176.05	-1.32558	0.36166	-3.66527	0.000247079	0.00262115
SMEL4.1_02g012490.1.01	975.148	-3.91311	0.711357	-5.50091	3.77839e-08	1.39078e-06
SMEL4.1_02g012600.1.01	88.3828	-1.65612	0.57123	-2.89922	0.00374089	0.0225076
SMEL4.1_02g012830.1.01	122.595	-1.58166	0.434633	-3.63907	0.000273622	0.00284527
SMEL4.1_02g013010.1.01	10.2078	-4.11687	1.47692	-2.78748	0.00531197	0.0295407
SMEL4.1_02g013080.1.01	1616.43	-1.07602	0.396162	-2.71612	0.00660526	0.034884
SMEL4.1_02g013580.1.01	12.7624	-2.07486	0.692622	-2.99566	0.00273852	0.0177271
SMEL4.1_02g013760.1.01	17.7437	-5.04283	0.977386	-5.1595	2.47604e-07	7.39486e-06
SMEL4.1_02g013940.1.01	5.39147	-5.81016	1.84259	-3.15325	0.00161462	0.0117703
SMEL4.1_02g013970.1.01	873.304	-1.26827	0.328314	-3.86299	0.000112009	0.00136274
SMEL4.1_02g014360.1.01	1663	-1.23689	0.299138	-4.13484	3.55195e-05	0.000525317
SMEL4.1_02g014480.1.01	101.738	-1.23634	0.319406	-3.87076	0.000108498	0.00132982
SMEL4.1_02g014510.1.01	2123.31	-1.53742	0.315315	-4.87582	1.08358e-06	2.72317e-05
SMEL4.1_02g014860.1.01	415.44	-1.22018	0.418389	-2.91638	0.0035412	0.0215928
SMEL4.1_02g014870.1.01	4644.35	-2.17696	0.531304	-4.09738	4.17856e-05	0.000603697
SMEL4.1_02g015010.1.01	732.594	-1.03351	0.286569	-3.60651	0.000310341	0.00313817
SMEL4.1_02g015100.1.01	4922.19	-1.62474	0.372119	-4.36618	1.26437e-05	0.000220961
SMEL4.1_02g015270.1.01	3006.96	-4.22633	0.609779	-6.93093	4.1808e-12	3.58482e-10
SMEL4.1_02g015620.1.01	7428.29	-2.138	0.362914	-5.8912	3.83407e-09	1.75155e-07
SMEL4.1_02g015630.1.01	99.6385	-2.68789	0.768273	-3.49861	0.000467686	0.00439651
SMEL4.1_02g015640.1.01	1238.42	-1.4974	0.457718	-3.27145	0.00106997	0.00848745
SMEL4.1_02g015670.1.01	280.848	-2.24732	0.541891	-4.14719	3.36577e-05	0.000503255
SMEL4.1_02g015740.1.01	54.1694	-2.46592	0.811566	-3.03848	0.00237777	0.0158537
SMEL4.1_02g015940.1.01	1010.12	-1.36617	0.352186	-3.87913	0.000104831	0.0012938
SMEL4.1_02g015990.1.01	41.8322	-1.1656	0.453751	-2.56881	0.0102049	0.0485785
SMEL4.1_02g016070.1.01	25.5957	-1.87464	0.55494	-3.37809	0.000729906	0.00630041
SMEL4.1_02g016360.1.01	14.6171	-1.90703	0.741696	-2.57118	0.0101353	0.0483066
SMEL4.1_02g016470.1.01	119.953	-2.40997	0.418326	-5.76099	8.36236e-09	3.55993e-07
SMEL4.1_02g016590.1.01	519.607	-2.81263	0.450704	-6.24053	4.36092e-10	2.50142e-08
SMEL4.1_02g016740.1.01	25.8307	-2.73391	0.574255	-4.7608	1.92831e-06	4.49796e-05
SMEL4.1_02g016820.1.01	300.79	-2.77476	0.432152	-6.42079	1.35567e-10	8.6568e-09
SMEL4.1_02g016930.1.01	989.368	-1.18062	0.346078	-3.41142	0.000646262	0.00569539
SMEL4.1_02g016950.1.01	263.4	-3.81079	0.549766	-6.93166	4.15936e-12	3.58482e-10
SMEL4.1_02g017170.1.01	3.68765	-5.2614	1.80786	-2.91029	0.00361089	0.0219367
SMEL4.1_02g017200.1.01	2350.08	-1.80621	0.592149	-3.05027	0.00228635	0.0153637
SMEL4.1_02g017260.1.01	2192.25	-2.122	0.264967	-8.00853	1.16083e-15	1.61649e-13
SMEL4.1_02g017280.1.01	1804.02	-1.30957	0.415653	-3.15062	0.00162926	0.0118583
SMEL4.1_02g017340.1.01	265.56	-3.80554	0.902672	-4.21587	2.4882e-05	0.000387844
SMEL4.1_02g017560.1.01	1723.9	-1.13363	0.374639	-3.02591	0.00247886	0.0163718
SMEL4.1_02g017650.1.01	294.393	-1.24967	0.301932	-4.13891	3.48963e-05	0.000517423
SMEL4.1_02g017660.1.01	1622.38	-2.08376	0.394724	-5.27904	1.29864e-07	4.14059e-06
SMEL4.1_02g017710.1.01	22.3423	-2.54835	0.709356	-3.59249	0.000327535	0.00328616
SMEL4.1_02g017730.1.01	89.7122	-3.62008	0.766211	-4.72466	2.30506e-06	5.23931e-05
SMEL4.1_02g018070.1.01	59.3123	-2.75483	0.479406	-5.74635	9.11889e-09	3.86775e-07
SMEL4.1_02g018240.1.01	26.3523	-5.22269	1.02611	-5.08979	3.58453e-07	1.03575e-05
SMEL4.1_02g018250.1.01	197.005	-6.22913	0.596616	-10.4408	1.61508e-25	5.65671e-23
SMEL4.1_02g018440.1.01	769.2	-1.10769	0.315717	-3.50849	0.000450652	0.00426065
SMEL4.1_02g018880.1.01	256.208	-1.06871	0.293864	-3.63676	0.00027609	0.00286102
SMEL4.1_02g018910.1.01	1406.8	-1.17802	0.286824	-4.10713	4.00602e-05	0.00058351
SMEL4.1_02g018920.1.01	358.133	-1.50337	0.38743	-3.88036	0.000104302	0.00128864
SMEL4.1_02g018930.1.01	233.481	-1.74544	0.44435	-3.92807	8.56304e-05	0.00109
SMEL4.1_02g018970.1.01	129.495	-1.67854	0.243788	-6.88524	5.76896e-12	4.77976e-10
SMEL4.1_02g018980.1.01	784.374	-2.15126	0.367569	-5.85268	4.83716e-09	2.13797e-07
SMEL4.1_02g019310.1.01	2327.55	-1.11563	0.419808	-2.65748	0.00787273	0.0399862
SMEL4.1_02g019510.1.01	394.007	-1.51327	0.50857	-2.97554	0.00292477	0.0186548
SMEL4.1_02g019660.1.01	12.1715	-4.04929	1.01333	-3.99602	6.44165e-05	0.000861222
SMEL4.1_02g019670.1.01	12.9183	-7.06841	1.88081	-3.75818	0.000171154	0.00193694
SMEL4.1_02g020310.1.01	18.5076	-2.58202	0.836591	-3.08636	0.00202626	0.0139818
SMEL4.1_02g020340.1.01	1774.91	-1.63844	0.523783	-3.12808	0.00175951	0.0125922
SMEL4.1_02g020470.1.01	4607.03	-1.54349	0.311468	-4.95552	7.21379e-07	1.91892e-05
SMEL4.1_02g020600.1.01	1071.83	-1.54251	0.565657	-2.72694	0.0063924	0.0340555
SMEL4.1_02g020850.1.01	196.743	-2.15646	0.460352	-4.68436	2.80831e-06	6.2056e-05
SMEL4.1_02g021060.1.01	741.603	-2.02857	0.594597	-3.41167	0.000645668	0.00569449
SMEL4.1_02g021240.1.01	1583.74	-1.45388	0.473723	-3.06905	0.00214741	0.0146472
SMEL4.1_02g021520.1.01	55.8379	-2.20428	0.676337	-3.25914	0.00111749	0.0088194
SMEL4.1_02g021620.1.01	58.5871	-2.17067	0.528748	-4.10529	4.03801e-05	0.000587061
SMEL4.1_02g021690.1.01	1528.25	-1.60692	0.288266	-5.57442	2.48357e-08	9.76363e-07
SMEL4.1_02g021840.1.01	130.899	-1.61978	0.345129	-4.69325	2.68895e-06	5.98246e-05
SMEL4.1_02g022100.1.01	224.816	-1.08375	0.375065	-2.88951	0.00385846	0.0231318
SMEL4.1_02g022220.1.01	181.141	-1.15737	0.286836	-4.03495	5.46148e-05	0.000753267
SMEL4.1_02g022520.1.01	229.365	-1.21231	0.219946	-5.51186	3.5507e-08	1.32384e-06
SMEL4.1_02g022580.1.01	82.0098	-1.70823	0.37434	-4.56332	5.03507e-06	0.000100757
SMEL4.1_02g022750.1.01	49.8907	-2.35345	0.784719	-2.9991	0.00270778	0.0175922
SMEL4.1_02g023060.1.01	245.217	-1.08889	0.344571	-3.16013	0.00157699	0.0115578
SMEL4.1_02g023160.1.01	1578.96	-2.37861	0.357102	-6.66086	2.72227e-11	2.00407e-09
SMEL4.1_02g023170.1.01	374.658	-2.40185	0.333464	-7.20271	5.90279e-13	5.83115e-11
SMEL4.1_02g023250.1.01	996.97	-1.55383	0.452877	-3.43102	0.00060132	0.00538101
SMEL4.1_02g023350.1.01	17.4168	-2.63343	0.67304	-3.91274	9.12549e-05	0.00115145
SMEL4.1_02g024120.1.01	111.449	-1.47101	0.37908	-3.88047	0.000104256	0.00128864
SMEL4.1_02g024310.1.01	1763.99	-1.58657	0.318777	-4.97706	6.45584e-07	1.75568e-05
SMEL4.1_02g024640.1.01	544.109	-1.217	0.366117	-3.32408	0.000887112	0.00736319
SMEL4.1_02g024750.1.01	2332.71	-1.65108	0.547066	-3.01806	0.00254401	0.016724
SMEL4.1_02g024870.1.01	35.6241	-2.42893	0.673771	-3.60498	0.000312183	0.00315265
SMEL4.1_02g025080.1.01	78.3459	-1.40849	0.528213	-2.66651	0.00766435	0.0391794
SMEL4.1_02g025200.1.01	61.4668	-1.9623	0.38463	-5.1018	3.36434e-07	9.75785e-06
SMEL4.1_02g025280.1.01	215.116	-1.54495	0.391941	-3.94181	8.08704e-05	0.00103913
SMEL4.1_02g025300.1.01	404.424	-1.40504	0.304442	-4.61515	3.9281e-06	8.23226e-05
SMEL4.1_02g025380.1.01	1289.01	-1.30796	0.342841	-3.81505	0.000136153	0.00159925
SMEL4.1_02g025790.1.01	903.989	-1.02085	0.330606	-3.0878	0.00201644	0.0139307
SMEL4.1_02g025810.1.01	753.732	-2.24057	0.331198	-6.76505	1.33263e-11	1.04071e-09
SMEL4.1_02g025930.1.01	12.3652	-1.88144	0.69084	-2.7234	0.00646128	0.034296
SMEL4.1_02g026000.1.01	100.184	-2.56084	0.4262	-6.00853	1.87211e-09	9.20762e-08
SMEL4.1_02g026010.1.01	263.54	-2.67544	0.246096	-10.8715	1.57516e-27	5.96908e-25
SMEL4.1_02g026020.1.01	883.134	-2.33137	0.254162	-9.17277	4.6102e-20	1.05514e-17
SMEL4.1_02g026150.1.01	160.336	-1.01525	0.309415	-3.28119	0.00103372	0.00828264
SMEL4.1_02g026320.1.01	212.716	-1.027	0.3202	-3.20735	0.00133963	0.0101898
SMEL4.1_02g026400.1.01	362.88	-1.1614	0.280555	-4.13965	3.47837e-05	0.000516416
SMEL4.1_02g026500.1.01	32.5005	-1.52263	0.479201	-3.17744	0.0014858	0.0110746
SMEL4.1_02g026520.1.01	1004.13	-1.15903	0.248522	-4.66367	3.10624e-06	6.73582e-05
SMEL4.1_02g027040.1.01	377.012	-1.7924	0.416101	-4.3076	1.65034e-05	0.000275844
SMEL4.1_02g027060.1.01	146.592	-1.50654	0.396603	-3.7986	0.000145517	0.00168704
SMEL4.1_02g027100.1.01	688.606	-1.1271	0.410329	-2.74682	0.0060176	0.0324931
SMEL4.1_02g027260.1.01	868.07	-1.65987	0.406798	-4.08034	4.49703e-05	0.000642083
SMEL4.1_02g027410.1.01	377.226	-1.86273	0.505358	-3.68595	0.000227851	0.00246122
SMEL4.1_02g027590.1.01	1013.45	-3.05886	0.748253	-4.088	4.35104e-05	0.000624712
SMEL4.1_02g027810.1.01	238.391	-1.31473	0.418293	-3.14308	0.0016718	0.0120842
SMEL4.1_02g027940.1.01	475.18	-1.40019	0.337333	-4.15076	3.31377e-05	0.000496442
SMEL4.1_02g028020.1.01	6085.85	-1.75326	0.498644	-3.51605	0.000438019	0.00417192
SMEL4.1_02g028220.1.01	533.858	-1.606	0.337375	-4.76028	1.9332e-06	4.50029e-05
SMEL4.1_02g028280.1.01	10.6515	-2.73539	0.799445	-3.42161	0.00062251	0.00553682
SMEL4.1_02g028690.1.01	19.4902	-2.07308	0.75174	-2.75771	0.00582084	0.0317121
SMEL4.1_02g028820.1.01	110.658	-6.98165	0.712284	-9.80179	1.10612e-22	3.0806e-20
SMEL4.1_02g028970.1.01	5059.06	-1.35782	0.428936	-3.16556	0.00154785	0.0113954
SMEL4.1_02g029380.1.01	347.166	-1.91945	0.542615	-3.53741	0.00040407	0.00390162
SMEL4.1_02g029470.1.01	79.6853	-6.84696	0.952733	-7.18665	6.63982e-13	6.50365e-11
SMEL4.1_02g029590.1.01	2519.14	-1.16276	0.360398	-3.22631	0.00125396	0.00964291
SMEL4.1_02g030140.1.01	43.7661	-1.54104	0.575343	-2.67847	0.00739597	0.0380346
SMEL4.1_02g030580.1.01	508.657	-2.4997	0.328301	-7.61407	2.65597e-14	3.21442e-12
SMEL4.1_02g030590.1.01	289.564	-2.19833	0.569483	-3.86023	0.000113283	0.00137102
SMEL4.1_02g030600.1.01	265.009	-1.05641	0.384621	-2.74663	0.00602102	0.0325039
SMEL4.1_02g030760.1.01	271.344	-1.90759	0.533173	-3.57781	0.000346491	0.00344642
SMEL4.1_02g030880.1.01	1839.1	-2.59043	0.894981	-2.8944	0.00379886	0.0228386
SMEL4.1_02g030910.1.01	4475.75	-1.3593	0.367909	-3.69467	0.000220171	0.00239504
SMEL4.1_02g031130.1.01	1043.98	-1.08714	0.354971	-3.0626	0.00219421	0.0148787
SMEL4.1_03g000110.1.01	8.07253	-3.40353	1.20682	-2.82026	0.00479849	0.0274152
SMEL4.1_03g000650.1.01	76.0074	-2.22956	0.483642	-4.60993	4.02802e-06	8.38088e-05
SMEL4.1_03g001000.1.01	399.814	-2.6426	0.557756	-4.73792	2.15923e-06	4.94186e-05
SMEL4.1_03g001010.1.01	164.831	-1.4863	0.261032	-5.69393	1.24145e-08	5.13368e-07
SMEL4.1_03g001020.1.01	815.208	-1.58841	0.387289	-4.10136	4.1073e-05	0.000594516
SMEL4.1_03g001210.1.01	47.453	-2.45998	0.808518	-3.04258	0.00234557	0.0157069
SMEL4.1_03g001240.1.01	273.979	-1.70972	0.295571	-5.78446	7.27454e-09	3.13144e-07
SMEL4.1_03g001740.1.01	1610.03	-3.31995	0.373407	-8.89097	6.05767e-19	1.16691e-16
SMEL4.1_03g001750.1.01	681.683	-2.28807	0.437213	-5.23331	1.66499e-07	5.13858e-06
SMEL4.1_03g001790.1.01	39.6747	-1.11369	0.434763	-2.56161	0.010419	0.0492122
SMEL4.1_03g002270.1.01	537.392	-1.72385	0.455984	-3.78052	0.000156503	0.00179987
SMEL4.1_03g002330.1.01	591.432	-4.64323	0.332271	-13.9742	2.23976e-44	1.99132e-41
SMEL4.1_03g002340.1.01	672.426	-1.38764	0.309224	-4.4875	7.20638e-06	0.000135986
SMEL4.1_03g002410.1.01	1351.12	-1.71677	0.38744	-4.43107	9.37676e-06	0.000172574
SMEL4.1_03g002540.1.01	6556.3	-1.34416	0.467878	-2.87289	0.00406741	0.0240898
SMEL4.1_03g002680.1.01	381.919	-1.14882	0.43396	-2.64729	0.00811387	0.0408343
SMEL4.1_03g002910.1.01	1017.91	-1.27943	0.351764	-3.63717	0.000275645	0.0028586
SMEL4.1_03g003030.1.01	536.225	-1.30636	0.325976	-4.00753	6.13578e-05	0.000831387
SMEL4.1_03g003160.1.01	32.7108	-2.42574	0.736998	-3.29137	0.000996993	0.00806103
SMEL4.1_03g003180.1.01	16.9652	-2.47304	0.654566	-3.77814	0.000158005	0.00181532
SMEL4.1_03g003300.1.01	47.3672	-1.83743	0.43392	-4.23449	2.29067e-05	0.000361936
SMEL4.1_03g003370.1.01	58.8411	-1.07024	0.356897	-2.99874	0.00271099	0.0176032
SMEL4.1_03g003550.1.01	263.697	-1.00505	0.204014	-4.92635	8.37784e-07	2.19821e-05
SMEL4.1_03g003710.1.01	720.111	-1.23434	0.220445	-5.5993	2.15224e-08	8.54833e-07
SMEL4.1_03g004040.1.01	1812.9	-2.43656	0.443756	-5.49077	4.00179e-08	1.46369e-06
SMEL4.1_03g004060.1.01	729.041	-1.58231	0.489053	-3.23545	0.00121451	0.00942601
SMEL4.1_03g004410.1.01	78.7156	-1.14762	0.262524	-4.37148	1.23406e-05	0.000216438
SMEL4.1_03g004850.1.01	121.089	-1.2591	0.474382	-2.65418	0.00795007	0.0402395
SMEL4.1_03g005760.1.01	2072.38	-1.98459	0.338256	-5.86713	4.43415e-09	1.99416e-07
SMEL4.1_03g005860.1.01	3440.15	-1.40836	0.400783	-3.51402	0.000441387	0.00419659
SMEL4.1_03g006010.1.01	124.983	-2.99634	0.779086	-3.84597	0.000120077	0.00143901
SMEL4.1_03g006830.1.01	2740.36	-1.43728	0.521979	-2.75352	0.00589576	0.0320112
SMEL4.1_03g007020.1.01	952.959	-1.02712	0.352139	-2.91681	0.00353636	0.0215747
SMEL4.1_03g007340.1.01	249.844	-1.02595	0.262384	-3.91012	9.22498e-05	0.00116083
SMEL4.1_03g007380.1.01	93.0827	-1.31397	0.300108	-4.37833	1.19592e-05	0.000210709
SMEL4.1_03g007430.1.01	2730.43	-1.90114	0.499492	-3.80616	0.000141144	0.00164616
SMEL4.1_03g007860.1.01	976.278	-1.33918	0.325022	-4.12026	3.78448e-05	0.000554386
SMEL4.1_03g008010.1.01	2652.58	-9.36812	0.526296	-17.8001	7.05405e-71	1.81179e-67
SMEL4.1_03g008030.1.01	689.433	-2.245	0.581708	-3.85932	0.000113701	0.00137464
SMEL4.1_03g008460.1.01	232.163	-4.60109	0.949357	-4.84653	1.2564e-06	3.09625e-05
SMEL4.1_03g008880.1.01	7162.17	-1.72507	0.546247	-3.15804	0.00158834	0.0116263
SMEL4.1_03g009390.1.01	45.8892	-1.0298	0.337243	-3.05359	0.00226123	0.0152392
SMEL4.1_03g010720.1.01	601.377	-1.29325	0.257438	-5.02353	5.07305e-07	1.418e-05
SMEL4.1_03g011070.1.01	6.5143	-2.68629	0.943964	-2.84575	0.00443064	0.0257722
SMEL4.1_03g011420.1.01	15.1724	-4.80182	1.03226	-4.65174	3.29141e-06	7.09742e-05
SMEL4.1_03g011450.1.01	14.379	-2.02157	0.740965	-2.72829	0.00636636	0.0339716
SMEL4.1_03g011640.1.01	16.4516	-2.38735	0.655546	-3.64177	0.000270771	0.00281943
SMEL4.1_03g012250.1.01	2848.49	-1.11632	0.314058	-3.55448	0.00037872	0.00370639
SMEL4.1_03g012880.1.01	1647.8	-3.73782	0.280159	-13.3418	1.3223e-40	8.73323e-38
SMEL4.1_03g013870.1.01	738.647	-1.63861	0.349536	-4.68796	2.75946e-06	6.10992e-05
SMEL4.1_03g014540.1.01	250.91	-1.4642	0.379189	-3.86141	0.000112734	0.00136796
SMEL4.1_03g014700.1.01	134.713	-1.54432	0.498051	-3.10073	0.00193047	0.0135022
SMEL4.1_03g015290.1.01	10451	-2.76479	0.511767	-5.40244	6.57405e-08	2.2852e-06
SMEL4.1_03g015360.1.01	151.439	-4.76025	0.609299	-7.81267	5.59898e-15	7.35376e-13
SMEL4.1_03g015370.1.01	4909.94	-2.08265	0.738873	-2.81869	0.00482201	0.0275088
SMEL4.1_03g015390.1.01	737.54	-2.0911	0.469037	-4.45827	8.2622e-06	0.000154023
SMEL4.1_03g015930.1.01	574.827	-1.72869	0.234493	-7.37203	1.68053e-13	1.77384e-11
SMEL4.1_03g015970.1.01	18.939	-4.12354	0.83938	-4.91261	8.98742e-07	2.33169e-05
SMEL4.1_03g016040.1.01	1022.68	-1.20548	0.44498	-2.70907	0.00674713	0.0354954
SMEL4.1_03g016130.1.01	1868.67	-4.06015	0.84146	-4.82512	1.39916e-06	3.42509e-05
SMEL4.1_03g016600.1.01	335.69	-2.39385	0.684216	-3.49868	0.000467574	0.00439651
SMEL4.1_03g016640.1.01	458.344	-1.1026	0.377147	-2.92352	0.00346093	0.0212097
SMEL4.1_03g016700.1.01	2027.38	-5.07978	0.558164	-9.10087	8.96124e-20	1.99181e-17
SMEL4.1_03g016940.1.01	132.699	-1.98736	0.375094	-5.29831	1.16882e-07	3.77353e-06
SMEL4.1_03g016970.1.01	4212.48	-1.29424	0.475638	-2.72105	0.00650741	0.0344696
SMEL4.1_03g017020.1.01	190.773	-1.11781	0.435219	-2.56838	0.0102175	0.0486083
SMEL4.1_03g017540.1.01	38.1524	-1.91104	0.734473	-2.60192	0.00927047	0.0452197
SMEL4.1_03g017780.1.01	313.312	-6.03825	2.0222	-2.98599	0.00282666	0.0181655
SMEL4.1_03g017940.1.01	1107.51	-2.19806	0.584938	-3.75776	0.000171442	0.00193888
SMEL4.1_03g018300.1.01	93.5496	-1.87918	0.28351	-6.62827	3.39647e-11	2.46896e-09
SMEL4.1_03g018350.1.01	336.776	-1.16046	0.256197	-4.52955	5.91092e-06	0.000114725
SMEL4.1_03g018520.1.01	113.367	-1.22235	0.33206	-3.68112	0.000232215	0.00249669
SMEL4.1_03g018640.1.01	81.4303	-1.70137	0.662769	-2.56707	0.0102562	0.0487166
SMEL4.1_03g018720.1.01	114.359	-3.77633	0.535048	-7.05792	1.69019e-12	1.53217e-10
SMEL4.1_03g018900.1.01	420.254	-1.45922	0.448265	-3.25525	0.00113292	0.00891373
SMEL4.1_03g019060.1.01	107.494	-3.7464	1.29654	-2.88954	0.00385812	0.0231318
SMEL4.1_03g019190.1.01	878.509	-1.48252	0.387033	-3.83046	0.000127901	0.00151931
SMEL4.1_03g019440.1.01	2104.79	-2.77044	0.863165	-3.20963	0.00132907	0.0101262
SMEL4.1_03g020710.1.01	205.839	-3.04531	1.10113	-2.76562	0.00568146	0.0311257
SMEL4.1_03g020850.1.01	119.957	-2.88257	0.595512	-4.84048	1.29524e-06	3.17932e-05
SMEL4.1_03g021000.1.01	629.268	-1.45846	0.469069	-3.10927	0.00187552	0.0131977
SMEL4.1_03g021040.1.01	1548.81	-1.15281	0.132528	-8.69856	3.36119e-18	6.21579e-16
SMEL4.1_03g021120.1.01	863.401	-1.19163	0.401207	-2.9701	0.00297699	0.0189055
SMEL4.1_03g021140.1.01	6.85606	-6.15349	1.69241	-3.63594	0.000276973	0.00286641
SMEL4.1_03g021900.1.01	13.9927	-2.14702	0.693907	-3.09411	0.00197407	0.0137212
SMEL4.1_03g021970.1.01	26.291	-6.2463	1.43468	-4.35379	1.33804e-05	0.000231167
SMEL4.1_03g022290.1.01	3413.65	-6.72532	0.573969	-11.7172	1.04033e-31	4.80965e-29
SMEL4.1_03g022300.1.01	3081.56	-7.72339	0.335322	-23.0327	2.19078e-117	5.0642e-113
SMEL4.1_03g022510.1.01	69.3165	-1.42023	0.366715	-3.87285	0.00010757	0.00132265
SMEL4.1_03g022720.1.01	763.319	-1.20183	0.449495	-2.67374	0.00750101	0.0385147
SMEL4.1_03g023020.1.01	84.0964	-1.14605	0.286776	-3.99632	6.4334e-05	0.000860617
SMEL4.1_03g023350.1.01	372.933	-2.26462	0.188187	-12.0339	2.35707e-33	1.23832e-30
SMEL4.1_03g023620.1.01	10.263	-2.30689	0.760689	-3.03263	0.00242429	0.0160942
SMEL4.1_03g023630.1.01	603.407	-1.0703	0.342235	-3.12739	0.00176364	0.012614
SMEL4.1_03g023660.1.01	419.351	-1.3341	0.496902	-2.68483	0.00725671	0.0374601
SMEL4.1_03g023920.1.01	112.439	-2.12164	0.72575	-2.92337	0.00346263	0.0212144
SMEL4.1_03g024350.1.01	915.697	-1.73861	0.67786	-2.56485	0.0103222	0.0489392
SMEL4.1_03g024380.1.01	904.038	-1.16637	0.439052	-2.65657	0.00789393	0.0400518
SMEL4.1_03g024760.1.01	728.644	-2.42423	0.438848	-5.52409	3.31205e-08	1.26131e-06
SMEL4.1_03g024910.1.01	4466.96	-1.55306	0.460946	-3.36929	0.000753622	0.00644019
SMEL4.1_03g024940.1.01	2348.81	-1.64762	0.502962	-3.27583	0.00105354	0.00839649
SMEL4.1_03g025130.1.01	170.521	-1.45458	0.47954	-3.03327	0.00241916	0.0160648
SMEL4.1_03g025190.1.01	150.288	-2.53837	0.644455	-3.93878	8.18957e-05	0.00104939
SMEL4.1_03g025200.1.01	1588.58	-1.99356	0.481073	-4.14399	3.41318e-05	0.000508138
SMEL4.1_03g025230.1.01	1975.58	-1.45422	0.26616	-5.4637	4.66306e-08	1.68424e-06
SMEL4.1_03g025300.1.01	119.846	-1.6689	0.27326	-6.10738	1.01279e-09	5.30878e-08
SMEL4.1_03g025800.1.01	215.124	-1.81746	0.622148	-2.92126	0.00348619	0.0213306
SMEL4.1_03g025920.1.01	192.846	-1.48063	0.382497	-3.87096	0.000108406	0.00132982
SMEL4.1_03g026020.1.01	22.3471	-2.0407	0.654757	-3.11673	0.00182872	0.0129383
SMEL4.1_03g026030.1.01	148.277	-2.92375	0.401961	-7.27372	3.49729e-13	3.56138e-11
SMEL4.1_03g026050.1.01	1822.67	-4.95254	0.560352	-8.83828	9.72058e-19	1.85703e-16
SMEL4.1_03g026150.1.01	629.847	-1.27591	0.368302	-3.4643	0.000531623	0.00487272
SMEL4.1_03g026220.1.01	21.4658	-4.33477	1.11151	-3.89989	9.62353e-05	0.00120394
SMEL4.1_03g026430.1.01	31.9096	-3.06765	0.668553	-4.58849	4.46471e-06	9.12523e-05
SMEL4.1_03g026680.1.01	147.334	-1.22031	0.361512	-3.37557	0.000736625	0.00633712
SMEL4.1_03g026830.1.01	140.103	-3.52196	0.859952	-4.09553	4.21198e-05	0.000607766
SMEL4.1_03g027150.1.01	261.463	-2.08087	0.38978	-5.33856	9.36868e-08	3.12506e-06
SMEL4.1_03g027330.1.01	183.077	-1.68347	0.382361	-4.40283	1.06849e-05	0.000193265
SMEL4.1_03g027600.1.01	17.9132	-1.77672	0.68837	-2.58105	0.00984993	0.0472192
SMEL4.1_03g027610.1.01	724.075	-4.58621	0.798653	-5.74244	9.33221e-09	3.95098e-07
SMEL4.1_03g027700.1.01	1247.8	-1.11888	0.39778	-2.8128	0.00491121	0.0278732
SMEL4.1_03g027750.1.01	787.629	-2.48065	0.724978	-3.42168	0.000622348	0.00553682
SMEL4.1_03g027770.1.01	325.759	-1.4447	0.483213	-2.98978	0.00279175	0.0179961
SMEL4.1_03g027890.1.01	122.208	-1.34346	0.279815	-4.80124	1.57683e-06	3.79292e-05
SMEL4.1_03g028010.1.01	992.489	-1.61709	0.272427	-5.93587	2.92297e-09	1.36776e-07
SMEL4.1_03g028150.1.01	9.66813	-5.66168	2.03405	-2.78345	0.00537841	0.0297933
SMEL4.1_03g028260.1.01	1278.01	-1.69399	0.631669	-2.68177	0.00732332	0.0377113
SMEL4.1_03g028380.1.01	9.97161	-6.69094	1.72028	-3.88946	0.000100469	0.00124795
SMEL4.1_03g028700.1.01	1314.58	-1.65348	0.49952	-3.31014	0.000932483	0.00766546
SMEL4.1_03g029070.1.01	274.081	-2.26594	0.485533	-4.66691	3.05767e-06	6.66802e-05
SMEL4.1_03g029110.1.01	28.7892	-1.85241	0.467473	-3.96259	7.41403e-05	0.000968264
SMEL4.1_03g029150.1.01	238.338	-1.45616	0.264456	-5.50622	3.6661e-08	1.3581e-06
SMEL4.1_03g029190.1.01	49.4036	-1.72026	0.394391	-4.36181	1.28989e-05	0.000224696
SMEL4.1_03g029240.1.01	208.147	-1.96527	0.487008	-4.0354	5.45084e-05	0.000752248
SMEL4.1_03g029250.1.01	389.376	-1.05752	0.31338	-3.37455	0.00073937	0.00635262
SMEL4.1_03g029270.1.01	22.7418	-2.6782	0.943196	-2.8395	0.00451845	0.0261554
SMEL4.1_03g029360.1.01	42.5871	-3.11463	0.809634	-3.84696	0.000119593	0.00143537
SMEL4.1_03g029440.1.01	525.871	-1.14722	0.360725	-3.18031	0.00147118	0.0109916
SMEL4.1_03g029490.1.01	1808.49	-1.41093	0.378985	-3.72291	0.00019694	0.00217821
SMEL4.1_03g029600.1.01	113.384	-1.38619	0.487075	-2.84595	0.00442788	0.0257691
SMEL4.1_03g029700.1.01	1619.44	-1.13562	0.37225	-3.0507	0.00228308	0.0153462
SMEL4.1_03g030430.1.01	1368.63	-2.02896	0.733952	-2.76443	0.00570226	0.031191
SMEL4.1_03g030460.1.01	169.298	-1.85944	0.490687	-3.78946	0.000150974	0.00174148
SMEL4.1_03g030620.1.01	85.3894	-2.60682	0.486451	-5.35884	8.37569e-08	2.81886e-06
SMEL4.1_03g030680.1.01	887.791	-1.21036	0.335909	-3.60322	0.000314294	0.00317259
SMEL4.1_03g030910.1.01	167.84	-5.48094	0.458021	-11.9666	5.31812e-33	2.67247e-30
SMEL4.1_03g030980.1.01	1295.67	-1.52061	0.310474	-4.8977	9.69634e-07	2.47943e-05
SMEL4.1_03g031250.1.01	65.2656	-1.37053	0.348551	-3.93206	8.42196e-05	0.00107619
SMEL4.1_03g031360.1.01	402.753	-1.65656	0.464517	-3.5662	0.00036219	0.00357184
SMEL4.1_03g031510.1.01	102.071	-1.84289	0.331894	-5.55265	2.81368e-08	1.08764e-06
SMEL4.1_03g031540.1.01	1150.43	-1.19934	0.388706	-3.08546	0.00203236	0.0140071
SMEL4.1_03g032070.1.01	1082.29	-1.37147	0.364921	-3.75828	0.000171087	0.00193694
SMEL4.1_03g032120.1.01	1181.54	-2.3219	0.407165	-5.70262	1.17981e-08	4.88755e-07
SMEL4.1_03g032230.1.01	20.4748	-1.54867	0.583146	-2.65571	0.0079142	0.0401282
SMEL4.1_03g032350.1.01	66.0535	-3.94055	0.460706	-8.55327	1.19647e-17	2.04871e-15
SMEL4.1_03g032360.1.01	870.187	-2.66386	0.404244	-6.58973	4.40614e-11	3.13392e-09
SMEL4.1_03g032590.1.01	168.507	-1.94759	0.726681	-2.68011	0.00735969	0.0378817
SMEL4.1_03g033460.1.01	345.44	-1.50572	0.496029	-3.03555	0.00240099	0.0159762
SMEL4.1_03g033500.1.01	3903.64	-1.80599	0.23768	-7.5984	2.99818e-14	3.53602e-12
SMEL4.1_03g033810.1.01	3.29602	-5.10139	1.98707	-2.56729	0.0102496	0.0487166
SMEL4.1_03g034030.1.01	1591.94	-1.06359	0.349461	-3.04353	0.00233818	0.0156665
SMEL4.1_04g000380.1.01	255.331	-1.08199	0.252058	-4.29264	1.76562e-05	0.000291738
SMEL4.1_04g000430.1.01	74.7368	-1.15989	0.308451	-3.76037	0.00016966	0.00192531
SMEL4.1_04g000460.1.01	1374.81	-1.02811	0.301454	-3.41052	0.000648382	0.00570971
SMEL4.1_04g000710.1.01	28.4894	-2.43447	0.938641	-2.59361	0.00949749	0.046026
SMEL4.1_04g000890.1.01	30.4153	-1.57507	0.469337	-3.35596	0.00079091	0.00669426
SMEL4.1_04g001100.1.01	10352.2	-1.22552	0.399713	-3.066	0.00216941	0.0147408
SMEL4.1_04g001300.1.01	864.126	-2.35047	0.228335	-10.2939	7.50602e-25	2.51463e-22
SMEL4.1_04g002070.1.01	107.87	-1.59362	0.556678	-2.86274	0.00420001	0.0247167
SMEL4.1_04g002850.1.01	1463.78	-1.0742	0.183419	-5.85651	4.72693e-09	2.10169e-07
SMEL4.1_04g003530.1.01	7148.2	-5.44328	0.495786	-10.9791	4.81741e-28	1.88744e-25
SMEL4.1_04g003540.1.01	9.57282	-6.63736	1.7093	-3.88309	0.000103139	0.00127701
SMEL4.1_04g003560.1.01	13.768	-7.16117	1.36213	-5.25734	1.46156e-07	4.59042e-06
SMEL4.1_04g003660.1.01	713.278	-2.27936	0.822185	-2.77232	0.00556584	0.0305823
SMEL4.1_04g003820.1.01	14.4495	-3.99843	1.22006	-3.27724	0.00104826	0.00837301
SMEL4.1_04g003850.1.01	7.26467	-2.86641	0.98705	-2.90401	0.00368411	0.0222529
SMEL4.1_04g003900.1.01	1490.99	-1.41302	0.265248	-5.32716	9.97604e-08	3.30855e-06
SMEL4.1_04g003910.1.01	1520.82	-1.98599	0.40037	-4.96038	7.03563e-07	1.88018e-05
SMEL4.1_04g003930.1.01	110.148	-1.05917	0.378843	-2.7958	0.00517707	0.0289976
SMEL4.1_04g004200.1.01	219.395	-1.67066	0.352318	-4.74191	2.11714e-06	4.86479e-05
SMEL4.1_04g004210.1.01	2072.92	-8.59299	0.460398	-18.6642	9.67265e-78	3.72655e-74
SMEL4.1_04g005080.1.01	486.374	-4.02393	0.88564	-4.54353	5.53192e-06	0.000108831
SMEL4.1_04g005120.1.01	183.199	-1.66226	0.593766	-2.79953	0.00511777	0.0287393
SMEL4.1_04g005610.1.01	537.967	-1.21055	0.302384	-4.00336	6.245e-05	0.00084322
SMEL4.1_04g005900.1.01	1279.02	-1.72355	0.518218	-3.32592	0.000881266	0.00732255
SMEL4.1_04g006520.1.01	160.138	-1.15338	0.424767	-2.71533	0.00662107	0.0349595
SMEL4.1_04g006530.1.01	696.61	-1.09423	0.319696	-3.42273	0.000619964	0.00552258
SMEL4.1_04g006800.1.01	2.85002	-4.88544	1.73232	-2.82017	0.00479986	0.0274163
SMEL4.1_04g007210.1.01	11471.2	-1.65123	0.522032	-3.16309	0.00156105	0.0114665
SMEL4.1_04g007220.1.01	279.445	-4.52482	0.370022	-12.2285	2.18915e-34	1.20487e-31
SMEL4.1_04g008170.1.01	181.87	-1.94678	0.430379	-4.52342	6.08493e-06	0.000117707
SMEL4.1_04g008770.1.01	193.325	-1.31007	0.333374	-3.92975	8.50344e-05	0.0010842
SMEL4.1_04g008780.1.01	140.868	-1.00455	0.272299	-3.68914	0.000225012	0.00243739
SMEL4.1_04g008840.1.01	382.872	-2.60112	0.482471	-5.39125	6.99703e-08	2.41769e-06
SMEL4.1_04g009010.1.01	182.288	-1.56106	0.489783	-3.18724	0.00143636	0.0107557
SMEL4.1_04g009040.1.01	9.96274	-4.13448	1.22426	-3.37714	0.000732435	0.00631517
SMEL4.1_04g009080.1.01	115.608	-3.93061	0.508619	-7.728	1.09249e-14	1.38e-12
SMEL4.1_04g009230.1.01	601.862	-1.09058	0.273983	-3.98046	6.87825e-05	0.000908553
SMEL4.1_04g009940.1.01	64.9195	-1.78913	0.597479	-2.99447	0.00274924	0.0177816
SMEL4.1_04g010230.1.01	20.1666	-1.95804	0.571535	-3.42593	0.00061269	0.00546621
SMEL4.1_04g010860.1.01	9.80009	-6.66921	1.52619	-4.36985	1.24332e-05	0.000217897
SMEL4.1_04g011850.1.01	1475.46	-1.36001	0.352941	-3.85336	0.000116509	0.00140345
SMEL4.1_04g011900.1.01	203.873	-1.2041	0.303811	-3.96333	7.39101e-05	0.00096635
SMEL4.1_04g012030.1.01	81.1118	-1.18488	0.332139	-3.56742	0.000360516	0.00355989
SMEL4.1_04g012140.1.01	658.841	-1.1088	0.331209	-3.34773	0.000814776	0.00686884
SMEL4.1_04g012150.1.01	3107.9	-1.09879	0.30582	-3.59294	0.000326968	0.00328332
SMEL4.1_04g012160.1.01	80.0357	-1.35243	0.480744	-2.81319	0.00490519	0.0278459
SMEL4.1_04g012960.1.01	4704.94	-1.16917	0.363953	-3.21243	0.00131616	0.0100389
SMEL4.1_04g013420.1.01	269.805	-1.15154	0.320276	-3.59547	0.000323811	0.00326011
SMEL4.1_04g014080.1.01	355.202	-2.54828	0.508036	-5.01594	5.27755e-07	1.46806e-05
SMEL4.1_04g014090.1.01	616.376	-2.26206	0.416821	-5.42694	5.73275e-08	2.02627e-06
SMEL4.1_04g014180.1.01	759.002	-6.91781	0.445906	-15.5141	2.78691e-54	3.22111e-51
SMEL4.1_04g014260.1.01	422.395	-1.79455	0.434561	-4.12958	3.6342e-05	0.000535562
SMEL4.1_04g014350.1.01	260.468	-2.88266	0.421102	-6.84553	7.61945e-12	6.22372e-10
SMEL4.1_04g014510.1.01	176.243	-1.699	0.312136	-5.44314	5.23489e-08	1.87032e-06
SMEL4.1_04g014560.1.01	3150.18	-2.29532	0.479323	-4.78868	1.67882e-06	4.0215e-05
SMEL4.1_04g014720.1.01	2007.96	-1.37249	0.229675	-5.9758	2.28965e-09	1.10496e-07
SMEL4.1_04g014730.1.01	86.3034	-1.39902	0.284914	-4.91033	9.09236e-07	2.35627e-05
SMEL4.1_04g014990.1.01	546.195	-1.56304	0.396372	-3.94336	8.03484e-05	0.00103704
SMEL4.1_04g015150.1.01	41.3966	-5.03527	0.664876	-7.57325	3.63995e-14	4.27112e-12
SMEL4.1_04g015360.1.01	6.87849	-4.16481	1.42017	-2.93261	0.00336128	0.0207806
SMEL4.1_04g015750.1.01	1289.8	-1.10799	0.354178	-3.12834	0.00175798	0.0125851
SMEL4.1_04g015980.1.01	907.584	-1.75927	0.381697	-4.60908	4.04456e-06	8.40773e-05
SMEL4.1_04g016010.1.01	21.4586	-3.61952	0.793329	-4.56245	5.05605e-06	0.000101016
SMEL4.1_04g016030.1.01	399.262	-1.3135	0.393893	-3.33466	0.000854033	0.00713474
SMEL4.1_04g016070.1.01	344.411	-3.4587	0.900925	-3.83905	0.000123511	0.00147518
SMEL4.1_04g016080.1.01	121.384	-2.7118	0.841669	-3.22193	0.0012733	0.0097462
SMEL4.1_04g016120.1.01	75.6866	-3.81561	0.913058	-4.17894	2.92876e-05	0.000446578
SMEL4.1_04g016130.1.01	11.961	-2.69522	0.828121	-3.25461	0.00113546	0.00893072
SMEL4.1_04g016140.1.01	215.521	-2.37237	0.773374	-3.06755	0.0021582	0.0146905
SMEL4.1_04g016440.1.01	153.893	-1.54234	0.547289	-2.81814	0.00483025	0.0275354
SMEL4.1_04g016600.1.01	650.697	-1.33882	0.333836	-4.01041	6.06131e-05	0.000823227
SMEL4.1_04g016610.1.01	2843.44	-2.05007	0.388587	-5.27569	1.32254e-07	4.211e-06
SMEL4.1_04g016660.1.01	142.534	-3.1472	0.505342	-6.22785	4.72865e-10	2.69357e-08
SMEL4.1_04g016770.1.01	44.6796	-2.05007	0.521811	-3.92876	8.53854e-05	0.00108748
SMEL4.1_04g016830.1.01	208.33	-1.78788	0.337483	-5.29771	1.17267e-07	3.77541e-06
SMEL4.1_04g017240.1.01	244.878	-1.68704	0.509053	-3.31408	0.000919449	0.00757988
SMEL4.1_04g017500.1.01	56.574	-2.58857	0.638801	-4.05224	5.07303e-05	0.000709852
SMEL4.1_04g017610.1.01	241.53	-1.56495	0.435473	-3.59367	0.000326058	0.00327702
SMEL4.1_04g017630.1.01	10.5352	-3.21645	0.956543	-3.36257	0.000772198	0.00657463
SMEL4.1_04g017740.1.01	206.174	-1.17638	0.410893	-2.86297	0.00419684	0.0247044
SMEL4.1_04g018280.1.01	693.256	-1.97733	0.614672	-3.21689	0.00129589	0.00990604
SMEL4.1_04g018400.1.01	63.8952	-1.85089	0.686302	-2.6969	0.00699891	0.0364713
SMEL4.1_04g018620.1.01	22.5572	-2.11998	0.647051	-3.27638	0.00105148	0.00839006
SMEL4.1_04g018850.1.01	136.772	-1.64795	0.422703	-3.89859	9.67525e-05	0.00120894
SMEL4.1_04g019010.1.01	24.5724	-7.99375	1.33822	-5.97343	2.32319e-09	1.11649e-07
SMEL4.1_04g019220.1.01	487.772	-1.11745	0.429315	-2.60287	0.00924464	0.04515
SMEL4.1_04g019510.1.01	157.313	-4.51576	0.731484	-6.17343	6.68261e-10	3.66924e-08
SMEL4.1_04g019740.1.01	1324.57	-2.87354	0.340556	-8.43779	3.23404e-17	5.41725e-15
SMEL4.1_04g019780.1.01	486.199	-1.61853	0.346454	-4.6717	2.98718e-06	6.5328e-05
SMEL4.1_04g019810.1.01	1153.18	-1.27203	0.433666	-2.93321	0.00335476	0.020746
SMEL4.1_04g019970.1.01	34.2968	-3.50567	0.736215	-4.76175	1.9192e-06	4.48569e-05
SMEL4.1_04g020070.1.01	484.992	-1.76867	0.62362	-2.83613	0.00456635	0.0263626
SMEL4.1_04g020180.1.01	2653.62	-1.01124	0.325115	-3.1104	0.00186835	0.0131633
SMEL4.1_04g020210.1.01	1416.38	-1.34441	0.406588	-3.30657	0.000944461	0.00772
SMEL4.1_04g020320.1.01	393.879	-1.36788	0.382563	-3.57557	0.000349471	0.00346975
SMEL4.1_04g020440.1.01	516.147	-1.70385	0.397598	-4.28536	1.82445e-05	0.000299107
SMEL4.1_04g020470.1.01	63.0909	-2.72477	0.935396	-2.91296	0.00358021	0.0217905
SMEL4.1_04g020550.1.01	2062.76	-3.14602	0.482045	-6.52642	6.73613e-11	4.59329e-09
SMEL4.1_04g020690.1.01	135.266	-2.37853	0.483893	-4.91541	8.85969e-07	2.30631e-05
SMEL4.1_04g020820.1.01	367.19	-1.62246	0.610977	-2.65551	0.00791882	0.0401341
SMEL4.1_04g020850.1.01	794.593	-1.95927	0.4888	-4.00832	6.11514e-05	0.000829564
SMEL4.1_04g020900.1.01	41.0725	-2.32144	0.46285	-5.01554	5.28853e-07	1.46935e-05
SMEL4.1_04g021200.1.01	159.294	-2.41298	0.491639	-4.90804	9.19927e-07	2.37864e-05
SMEL4.1_04g021630.1.01	158.263	-1.03247	0.394995	-2.61388	0.00895197	0.044032
SMEL4.1_04g021650.1.01	206.651	-4.57892	0.433584	-10.5606	4.53619e-26	1.63842e-23
SMEL4.1_04g021660.1.01	495.879	-1.3654	0.350346	-3.89729	9.72737e-05	0.00121414
SMEL4.1_04g021790.1.01	548.209	-1.15119	0.297641	-3.8677	0.000109865	0.00134372
SMEL4.1_04g022000.1.01	407.847	-3.6209	0.532702	-6.79724	1.06646e-11	8.53021e-10
SMEL4.1_04g022270.1.01	75.2312	-1.52985	0.420132	-3.64135	0.00027121	0.00282273
SMEL4.1_04g022770.1.01	1722.19	-1.45507	0.297508	-4.89084	1.00405e-06	2.55052e-05
SMEL4.1_04g023150.1.01	38663.6	-1.32116	0.32678	-4.04297	5.27777e-05	0.000733179
SMEL4.1_04g023430.1.01	1045.71	-2.61042	0.439165	-5.94405	2.7807e-09	1.30914e-07
SMEL4.1_04g023630.1.01	518.85	-2.01859	0.384247	-5.25335	1.49355e-07	4.66551e-06
SMEL4.1_04g023650.1.01	463.038	-2.29546	0.539474	-4.255	2.09049e-05	0.000336048
SMEL4.1_04g023740.1.01	2733.79	-1.95526	0.494489	-3.9541	7.68241e-05	0.0009988
SMEL4.1_05g000280.1.01	728.491	-1.43173	0.155498	-9.20742	3.34047e-20	7.87941e-18
SMEL4.1_05g000400.1.01	26.3845	-1.97099	0.605254	-3.25647	0.00112806	0.00888349
SMEL4.1_05g000440.1.01	132.965	-1.1797	0.268104	-4.40016	1.08172e-05	0.000195046
SMEL4.1_05g000740.1.01	114.628	-4.04814	0.745495	-5.43014	5.63092e-08	1.99639e-06
SMEL4.1_05g000790.1.01	132.064	-1.72315	0.425249	-4.0521	5.07608e-05	0.000709852
SMEL4.1_05g000910.1.01	196.774	-1.29038	0.27026	-4.77458	1.80085e-06	4.28005e-05
SMEL4.1_05g000940.1.01	11.7217	-6.92557	1.34794	-5.13788	2.77848e-07	8.20272e-06
SMEL4.1_05g001190.1.01	54.1295	-1.67989	0.426292	-3.94069	8.12475e-05	0.00104282
SMEL4.1_05g001260.1.01	49.2979	-3.09949	0.833684	-3.71782	0.00020095	0.00221726
SMEL4.1_05g001510.1.01	118.485	-1.72414	0.540555	-3.18957	0.00142484	0.0106937
SMEL4.1_05g001670.1.01	595.695	-1.33179	0.201387	-6.6131	3.76362e-11	2.70689e-09
SMEL4.1_05g002020.1.01	22.1201	-4.64306	1.21665	-3.81628	0.000135481	0.0015954
SMEL4.1_05g002300.1.01	50.06	-2.30902	0.655258	-3.52384	0.000425348	0.00407305
SMEL4.1_05g002320.1.01	237.248	-1.92531	0.693434	-2.77649	0.0054949	0.0302789
SMEL4.1_05g002330.1.01	56.2465	-4.4107	0.905354	-4.8718	1.10588e-06	2.76661e-05
SMEL4.1_05g002730.1.01	18.0387	-1.5387	0.564648	-2.72507	0.00642883	0.0341669
SMEL4.1_05g002740.1.01	32.2959	-4.24189	1.20543	-3.51898	0.000433202	0.00413798
SMEL4.1_05g003280.1.01	203.937	-2.22363	0.403527	-5.51049	3.57835e-08	1.32986e-06
SMEL4.1_05g003290.1.01	94.4855	-1.37733	0.520949	-2.64388	0.00819619	0.0411829
SMEL4.1_05g003300.1.01	216.935	-1.52519	0.336247	-4.53592	5.73522e-06	0.000111965
SMEL4.1_05g003600.1.01	306.433	-1.65288	0.48794	-3.38746	0.00070542	0.00612565
SMEL4.1_05g003750.1.01	137.547	-2.11946	0.374199	-5.66401	1.4788e-08	6.05025e-07
SMEL4.1_05g004430.1.01	23.2276	-1.41242	0.495345	-2.85139	0.00435286	0.0253964
SMEL4.1_05g004440.1.01	555.922	-1.17792	0.213006	-5.52999	3.20252e-08	1.22363e-06
SMEL4.1_05g004450.1.01	579.876	-1.16723	0.23876	-4.88872	1.01493e-06	2.56968e-05
SMEL4.1_05g004760.1.01	75.7054	-7.1629	0.894124	-8.01109	1.13701e-15	1.59291e-13
SMEL4.1_05g004840.1.01	898.352	-1.7794	0.461522	-3.85551	0.00011549	0.00139409
SMEL4.1_05g004990.1.01	2020.65	-1.15183	0.266256	-4.32604	1.51816e-05	0.000257663
SMEL4.1_05g005100.1.01	19.5481	-2.79273	0.588167	-4.7482	2.05237e-06	4.73008e-05
SMEL4.1_05g005120.1.01	5.7689	-3.94379	1.2647	-3.11836	0.00181862	0.0128899
SMEL4.1_05g005550.1.01	1463.31	-1.14112	0.293385	-3.8895	0.00010045	0.00124795
SMEL4.1_05g005770.1.01	8815.41	-1.99694	0.433163	-4.61013	4.0242e-06	8.38048e-05
SMEL4.1_05g005870.1.01	1612.57	-1.12442	0.278852	-4.0323	5.52341e-05	0.000759543
SMEL4.1_05g006220.1.01	171.625	-1.02295	0.374725	-2.72987	0.00633586	0.0338557
SMEL4.1_05g006850.1.01	4.72566	-5.61616	1.51616	-3.7042	0.000212056	0.00231768
SMEL4.1_05g006860.1.01	5.54297	-4.84483	1.7918	-2.70389	0.0068532	0.035921
SMEL4.1_05g006900.1.01	677.478	-1.09145	0.330927	-3.29815	0.000973249	0.00790778
SMEL4.1_05g006920.1.01	790.98	-1.35765	0.294413	-4.61137	4.0003e-06	8.33822e-05
SMEL4.1_05g007350.1.01	290.971	-1.51013	0.413163	-3.65505	0.000257128	0.00270282
SMEL4.1_05g007910.1.01	31.5304	-1.13345	0.407436	-2.78192	0.00540387	0.0298952
SMEL4.1_05g008030.1.01	11.5075	-4.98288	1.45893	-3.41543	0.000636825	0.00563154
SMEL4.1_05g008200.1.01	1858.4	-5.90488	0.585372	-10.0874	6.28184e-24	2.01682e-21
SMEL4.1_05g008210.1.01	52.8651	-1.12538	0.362327	-3.10597	0.00189655	0.0133133
SMEL4.1_05g008240.1.01	1168.46	-1.30727	0.378599	-3.45291	0.000554566	0.00504302
SMEL4.1_05g009510.1.01	45.7521	-3.91515	1.13717	-3.4429	0.000575504	0.00519054
SMEL4.1_05g010380.1.01	12.1232	-2.78335	0.932002	-2.98642	0.00282263	0.0181547
SMEL4.1_05g010520.1.01	59.3378	-1.26809	0.427438	-2.96673	0.0030099	0.0190517
SMEL4.1_05g012120.1.01	131.619	-1.83973	0.512351	-3.59077	0.000329701	0.00330358
SMEL4.1_05g012130.1.01	61.8231	-1.16537	0.436881	-2.66749	0.00764209	0.0390829
SMEL4.1_05g012320.1.01	241.831	-2.56595	0.541797	-4.73599	2.17987e-06	4.98417e-05
SMEL4.1_05g013640.1.01	43.6853	-1.03427	0.38696	-2.67281	0.0075218	0.0386043
SMEL4.1_05g014030.1.01	74.9653	-4.4311	0.732171	-6.052	1.43056e-09	7.22024e-08
SMEL4.1_05g014040.1.01	90.9439	-3.22462	0.820372	-3.93067	8.4708e-05	0.00108063
SMEL4.1_05g014050.1.01	5.11297	-3.75181	1.44828	-2.59053	0.00958284	0.0463231
SMEL4.1_05g014630.1.01	147.335	-1.42853	0.438683	-3.25641	0.00112831	0.00888349
SMEL4.1_05g015140.1.01	4800.18	-1.29663	0.409186	-3.16879	0.00153073	0.0113158
SMEL4.1_05g015880.1.01	172.389	-1.78941	0.431526	-4.14671	3.37286e-05	0.000503989
SMEL4.1_05g016110.1.01	1764.15	-2.37988	0.423921	-5.61397	1.97735e-08	7.90804e-07
SMEL4.1_05g016190.1.01	129.096	-1.74284	0.540872	-3.22229	0.00127172	0.00973735
SMEL4.1_05g016390.1.01	4.38201	-4.49141	1.51795	-2.95886	0.00308775	0.0194399
SMEL4.1_05g016490.1.01	3525.01	-1.17403	0.280536	-4.18497	2.85209e-05	0.000436326
SMEL4.1_05g016600.1.01	141.719	-8.66696	1.07513	-8.06131	7.54804e-16	1.07043e-13
SMEL4.1_05g016620.1.01	833.32	-1.69305	0.451744	-3.74781	0.000178386	0.00199883
SMEL4.1_05g016720.1.01	822.389	-4.80236	0.219555	-21.8732	4.67848e-106	5.40739e-102
SMEL4.1_05g017010.1.01	26.9518	-2.04089	0.763445	-2.67326	0.00751179	0.0385615
SMEL4.1_05g017140.1.01	2009.99	-2.10765	0.59614	-3.5355	0.000406997	0.00392497
SMEL4.1_05g017210.1.01	896.694	-1.1979	0.320403	-3.73874	0.000184948	0.00206434
SMEL4.1_05g017240.1.01	1682.66	-5.60559	0.681573	-8.2245	1.96011e-16	2.96143e-14
SMEL4.1_05g017250.1.01	1040.45	-5.79488	0.77061	-7.51986	5.48352e-14	6.18327e-12
SMEL4.1_05g017360.1.01	950.569	-1.85386	0.308071	-6.01765	1.76966e-09	8.77844e-08
SMEL4.1_05g017410.1.01	1428.69	-1.31239	0.510776	-2.56941	0.0101873	0.0485071
SMEL4.1_05g017490.1.01	46.9215	-1.65991	0.50289	-3.30075	0.000964269	0.00784584
SMEL4.1_05g017580.1.01	8.1881	-3.07481	1.04346	-2.94676	0.00321126	0.0200355
SMEL4.1_05g017900.1.01	11.0722	-4.93884	1.23517	-3.99851	6.37413e-05	0.000854666
SMEL4.1_05g018100.1.01	714.247	-1.03767	0.317178	-3.27158	0.00106948	0.00848681
SMEL4.1_05g018460.1.01	410.471	-2.61849	0.760277	-3.44413	0.000572905	0.00517517
SMEL4.1_05g018560.1.01	2475.66	-1.6994	0.401129	-4.23654	2.26991e-05	0.000359391
SMEL4.1_05g018820.1.01	51.4373	-2.50967	0.636934	-3.94024	8.14e-05	0.0010442
SMEL4.1_05g019280.1.01	5414.57	-1.93607	0.314471	-6.15659	7.43297e-10	4.03334e-08
SMEL4.1_05g019390.1.01	132.225	-1.28728	0.442987	-2.90591	0.00366182	0.0221472
SMEL4.1_05g019570.1.01	32.5949	-1.15477	0.420011	-2.74938	0.00597081	0.0323043
SMEL4.1_05g019720.1.01	36.9996	-8.5861	1.4388	-5.96753	2.40875e-09	1.15281e-07
SMEL4.1_05g019900.1.01	116.47	-1.04402	0.254288	-4.10567	4.03146e-05	0.000586847
SMEL4.1_05g020220.1.01	504.529	-3.2287	0.636024	-5.07638	3.84698e-07	1.10359e-05
SMEL4.1_05g020240.1.01	86.8253	-7.91936	1.2752	-6.21029	5.28857e-10	2.98172e-08
SMEL4.1_05g020340.1.01	54.7739	-2.48628	0.906756	-2.74196	0.00610744	0.032863
SMEL4.1_05g020350.1.01	432.922	-2.13609	0.778949	-2.74227	0.00610158	0.0328514
SMEL4.1_05g020400.1.01	199.956	-1.59515	0.576961	-2.76474	0.00569677	0.0311712
SMEL4.1_05g020570.1.01	14.4611	-1.54132	0.595814	-2.58691	0.00968402	0.046695
SMEL4.1_05g020770.1.01	134.454	-1.2096	0.328115	-3.68652	0.000227341	0.00245916
SMEL4.1_05g020820.1.01	570.803	-1.0167	0.334244	-3.04179	0.00235176	0.0157301
SMEL4.1_05g020880.1.01	62.6416	-1.18058	0.27366	-4.31405	1.6029e-05	0.000269473
SMEL4.1_05g020990.1.01	365.978	-1.00767	0.258111	-3.90404	9.46016e-05	0.00118719
SMEL4.1_05g021420.1.01	1992.99	-1.33551	0.355613	-3.75552	0.000172982	0.00195342
SMEL4.1_05g021430.1.01	241.923	-1.58925	0.293833	-5.40868	6.34902e-08	2.21364e-06
SMEL4.1_05g021810.1.01	232.233	-1.82965	0.383997	-4.76476	1.89075e-06	4.44518e-05
SMEL4.1_05g021870.1.01	1340.26	-2.39952	0.450908	-5.32153	1.02896e-07	3.38341e-06
SMEL4.1_05g022740.1.01	2786.51	-1.64881	0.388485	-4.2442	2.19373e-05	0.000349726
SMEL4.1_05g022900.1.01	44.7505	-3.80243	0.941371	-4.03925	5.36235e-05	0.000742038
SMEL4.1_05g022980.1.01	582.366	-1.1408	0.322827	-3.53379	0.000409652	0.00394564
SMEL4.1_05g023080.1.01	190.483	-5.36021	0.635947	-8.4287	3.49526e-17	5.77117e-15
SMEL4.1_05g023160.1.01	75.7724	-2.32436	0.702837	-3.30711	0.000942627	0.00771279
SMEL4.1_05g024200.1.01	732.702	-1.79605	0.354872	-5.06111	4.16824e-07	1.19101e-05
SMEL4.1_05g024480.1.01	231.451	-1.26242	0.486332	-2.59579	0.00943728	0.0458014
SMEL4.1_05g025020.1.01	879.801	-1.19575	0.276637	-4.32245	1.54303e-05	0.000261118
SMEL4.1_06g000180.1.01	825.396	-1.68025	0.512933	-3.27577	0.00105374	0.00839649
SMEL4.1_06g000380.1.01	529.934	-1.47853	0.237504	-6.22527	4.80733e-10	2.73038e-08
SMEL4.1_06g000870.1.01	420.798	-1.22609	0.250167	-4.90109	9.5305e-07	2.44785e-05
SMEL4.1_06g000890.1.01	3953.44	-1.2795	0.337919	-3.78642	0.000152836	0.00176107
SMEL4.1_06g001410.1.01	64.9062	-1.28412	0.447762	-2.86786	0.00413253	0.0244129
SMEL4.1_06g001420.1.01	114.682	-4.72123	0.839812	-5.62176	1.89019e-08	7.62541e-07
SMEL4.1_06g001540.1.01	14.6748	-1.5971	0.601756	-2.65406	0.0079529	0.040245
SMEL4.1_06g001590.1.01	48.424	-2.34683	0.459644	-5.10575	3.2948e-07	9.58019e-06
SMEL4.1_06g002000.1.01	37.7886	-1.09762	0.428136	-2.56372	0.0103556	0.0490326
SMEL4.1_06g002640.1.01	9.03737	-2.28245	0.782069	-2.91848	0.00351741	0.0214818
SMEL4.1_06g002670.1.01	28.3793	-1.63596	0.482515	-3.39048	0.000697693	0.00607453
SMEL4.1_06g002910.1.01	117.446	-1.62411	0.404082	-4.01927	5.83798e-05	0.00079617
SMEL4.1_06g003680.1.01	247.351	-1.29768	0.375046	-3.46006	0.000540055	0.0049363
SMEL4.1_06g005000.1.01	70.7735	-2.2436	0.356855	-6.28716	3.23336e-10	1.93306e-08
SMEL4.1_06g005120.1.01	92.7732	-2.71074	0.444133	-6.10344	1.03807e-09	5.42898e-08
SMEL4.1_06g005220.1.01	715.701	-2.35035	0.624478	-3.7637	0.000167418	0.00190548
SMEL4.1_06g005230.1.01	4865.13	-2.05844	0.562352	-3.66041	0.000251811	0.00265429
SMEL4.1_06g005640.1.01	14.742	-2.13081	0.712294	-2.99148	0.00277633	0.0179117
SMEL4.1_06g006300.1.01	4087.54	-1.85668	0.576868	-3.21855	0.00128839	0.00985521
SMEL4.1_06g006510.1.01	616.287	-1.03043	0.239367	-4.30481	1.67127e-05	0.000278738
SMEL4.1_06g006590.1.01	88.8746	-1.14705	0.288315	-3.97846	6.93633e-05	0.000914662
SMEL4.1_06g006900.1.01	10.76	-2.58252	0.918158	-2.81272	0.00491248	0.0278736
SMEL4.1_06g006930.1.01	940.948	-1.84198	0.484668	-3.8005	0.000144406	0.00167659
SMEL4.1_06g006940.1.01	21.258	-6.81407	1.311	-5.19761	2.01866e-07	6.14801e-06
SMEL4.1_06g007110.1.01	300.763	-2.01168	0.384551	-5.23125	1.68369e-07	5.18937e-06
SMEL4.1_06g007120.1.01	12.4353	-7.01394	1.35339	-5.18249	2.18945e-07	6.61585e-06
SMEL4.1_06g007140.1.01	35.7224	-2.55128	0.513358	-4.9698	6.70234e-07	1.80362e-05
SMEL4.1_06g008330.1.01	11201.1	-3.71159	0.266185	-13.9436	3.43948e-44	2.94471e-41
SMEL4.1_06g008610.1.01	94.8337	-1.80286	0.437394	-4.12182	3.75893e-05	0.000551878
SMEL4.1_06g009030.1.01	2060.66	-1.53786	0.378119	-4.06714	4.75937e-05	0.000674541
SMEL4.1_06g009090.1.01	1808.71	-1.55156	0.559751	-2.77187	0.00557349	0.0306099
SMEL4.1_06g009120.1.01	158.906	-1.64405	0.619085	-2.65562	0.00791636	0.0401304
SMEL4.1_06g009160.1.01	12.4516	-5.13155	1.21743	-4.21507	2.49697e-05	0.000388686
SMEL4.1_06g009610.1.01	2.86275	-4.89125	1.72841	-2.82992	0.00465602	0.0267666
SMEL4.1_06g010420.1.01	12114.4	-1.18108	0.383054	-3.08332	0.00204703	0.0140914
SMEL4.1_06g010620.1.01	4516.67	-2.9612	0.476569	-6.21358	5.17918e-10	2.92718e-08
SMEL4.1_06g010890.1.01	21.9043	-2.52133	0.751669	-3.35431	0.000795626	0.00672703
SMEL4.1_06g010900.1.01	4.01068	-5.3761	1.60443	-3.35077	0.000805864	0.00680115
SMEL4.1_06g011230.1.01	420.305	-1.51336	0.219245	-6.90262	5.10514e-12	4.30695e-10
SMEL4.1_06g011500.1.01	97.1515	-9.97632	1.22885	-8.11845	4.72169e-16	6.86456e-14
SMEL4.1_06g011510.1.01	448.303	-4.52363	0.456633	-9.90648	3.90137e-23	1.14157e-20
SMEL4.1_06g011550.1.01	619.459	-1.48326	0.535561	-2.76955	0.00561333	0.0307994
SMEL4.1_06g011610.1.01	67.7275	-1.42676	0.337279	-4.2302	2.33481e-05	0.000367654
SMEL4.1_06g011700.1.01	3.75762	-5.28663	1.59807	-3.30814	0.00093917	0.00770399
SMEL4.1_06g011820.1.01	67.0865	-1.3857	0.464659	-2.98218	0.00286203	0.0183621
SMEL4.1_06g012110.1.01	239.179	-2.20386	0.731912	-3.0111	0.00260306	0.0170508
SMEL4.1_06g012280.1.01	286.941	-1.18578	0.462443	-2.56418	0.0103421	0.0489993
SMEL4.1_06g012320.1.01	903.767	-1.39102	0.302954	-4.59153	4.40011e-06	9.03312e-05
SMEL4.1_06g012330.1.01	964.943	-1.26277	0.26442	-4.77564	1.79137e-06	4.2646e-05
SMEL4.1_06g012430.1.01	546.772	-2.81141	0.311297	-9.03128	1.69682e-19	3.5985e-17
SMEL4.1_06g012480.1.01	472.299	-1.38143	0.468079	-2.95127	0.00316468	0.019809
SMEL4.1_06g012530.1.01	43.6419	-2.17378	0.793064	-2.74099	0.00612538	0.0329443
SMEL4.1_06g012590.1.01	551.333	-2.28223	0.254987	-8.95036	3.54334e-19	7.12243e-17
SMEL4.1_06g012890.1.01	108.43	-1.68395	0.396186	-4.2504	2.13389e-05	0.000341364
SMEL4.1_06g012980.1.01	25.0112	-1.20508	0.469445	-2.56704	0.0102571	0.0487166
SMEL4.1_06g013000.1.01	23.2374	-4.98915	0.906391	-5.50441	3.70401e-08	1.36995e-06
SMEL4.1_06g013440.1.01	79.5994	-1.25333	0.435713	-2.8765	0.00402115	0.0238708
SMEL4.1_06g013500.1.01	80.7691	-1.71961	0.633356	-2.71508	0.00662588	0.0349689
SMEL4.1_06g013790.1.01	266.146	-1.82831	0.501735	-3.64397	0.000268468	0.00279798
SMEL4.1_06g013820.1.01	5239.35	-1.57447	0.412621	-3.81579	0.00013575	0.00159694
SMEL4.1_06g014610.1.01	20.8476	-1.53147	0.561537	-2.72727	0.00638602	0.0340406
SMEL4.1_06g014720.1.01	10.3985	-6.75104	1.36356	-4.95103	7.3823e-07	1.95923e-05
SMEL4.1_06g014930.1.01	1559.49	-2.17281	0.542731	-4.00348	6.2417e-05	0.00084322
SMEL4.1_06g015300.1.01	157.027	-2.03618	0.546557	-3.72548	0.000194947	0.00215927
SMEL4.1_06g015360.1.01	51.943	-1.79332	0.580869	-3.08731	0.00201976	0.0139432
SMEL4.1_06g015470.1.01	27.6518	-1.81336	0.639326	-2.83637	0.00456297	0.0263562
SMEL4.1_06g015920.1.01	989.76	-1.34702	0.436109	-3.08873	0.00201017	0.0138998
SMEL4.1_06g016120.1.01	442.776	-1.25909	0.40739	-3.09063	0.00199733	0.0138315
SMEL4.1_06g016420.1.01	574.763	-2.73117	0.383761	-7.11686	1.10414e-12	1.05468e-10
SMEL4.1_06g016790.1.01	139.567	-1.22505	0.367207	-3.33614	0.000849503	0.00710717
SMEL4.1_06g017210.1.01	39.07	-4.72713	0.93121	-5.07633	3.84794e-07	1.10359e-05
SMEL4.1_06g017220.1.01	756.2	-3.14693	0.677186	-4.64706	3.36692e-06	7.22652e-05
SMEL4.1_06g017240.1.01	17.5234	-3.55992	0.811425	-4.38725	1.14792e-05	0.000204562
SMEL4.1_06g017490.1.01	170.383	-1.31341	0.341412	-3.84701	0.00011957	0.00143537
SMEL4.1_06g017760.1.01	29.684	-5.05142	0.748382	-6.74978	1.48067e-11	1.14091e-09
SMEL4.1_06g018600.1.01	22.0993	-1.90012	0.534477	-3.5551	0.000377839	0.00370261
SMEL4.1_06g018630.1.01	318.786	-1.6746	0.497867	-3.36356	0.000769449	0.00655769
SMEL4.1_06g018980.1.01	165.878	-1.39801	0.406913	-3.43565	0.000591131	0.00530646
SMEL4.1_06g019380.1.01	743.654	-1.14474	0.297365	-3.8496	0.000118311	0.00142219
SMEL4.1_06g019480.1.01	21.849	-3.28209	1.13789	-2.88437	0.00392202	0.0234388
SMEL4.1_06g019550.1.01	16.8548	-1.53896	0.583506	-2.63744	0.00835351	0.0418055
SMEL4.1_06g019690.1.01	5.92742	-4.93818	1.51766	-3.2538	0.00113871	0.00895321
SMEL4.1_06g020380.1.01	707.975	-4.61657	0.51039	-9.04517	1.4943e-19	3.19835e-17
SMEL4.1_06g020500.1.01	10.0874	-6.7119	2.09132	-3.20941	0.0013301	0.0101273
SMEL4.1_06g020510.1.01	122.896	-5.2017	0.683355	-7.61201	2.69875e-14	3.24918e-12
SMEL4.1_06g020730.1.01	5694.4	-1.7979	0.386542	-4.65123	3.29955e-06	7.10833e-05
SMEL4.1_06g020830.1.01	2730.26	-1.10304	0.34877	-3.16265	0.00156341	0.0114766
SMEL4.1_06g021020.1.01	417.089	-1.21508	0.241753	-5.02614	5.00458e-07	1.40056e-05
SMEL4.1_06g021170.1.01	98.2295	-1.40933	0.326495	-4.31654	1.58495e-05	0.000267428
SMEL4.1_06g022090.1.01	131.56	-1.34455	0.47134	-2.85261	0.00433615	0.0253287
SMEL4.1_06g022360.1.01	106.229	-2.73585	0.313493	-8.72699	2.61538e-18	4.87558e-16
SMEL4.1_06g022620.1.01	180.377	-4.82352	1.00697	-4.79015	1.66655e-06	3.99625e-05
SMEL4.1_06g022790.1.01	7.83728	-4.37338	1.38168	-3.16527	0.00154939	0.0113954
SMEL4.1_06g023090.1.01	2783.88	-2.09549	0.525673	-3.9863	6.7112e-05	0.000889541
SMEL4.1_06g023110.1.01	171.867	-1.45871	0.456442	-3.19582	0.00139434	0.010516
SMEL4.1_06g023210.1.01	11.0231	-2.73771	1.06245	-2.57679	0.00997217	0.0476767
SMEL4.1_06g023370.1.01	312.473	-2.79426	0.558462	-5.0035	5.62993e-07	1.56045e-05
SMEL4.1_06g024140.1.01	1239.57	-2.88357	0.391026	-7.37435	1.65145e-13	1.75115e-11
SMEL4.1_06g024280.1.01	6.63971	-4.14669	1.61144	-2.57328	0.010074	0.048074
SMEL4.1_06g024310.1.01	615.62	-3.788	0.762152	-4.97014	6.69058e-07	1.80263e-05
SMEL4.1_06g024320.1.01	70.7346	-1.56554	0.572462	-2.73475	0.00624275	0.0334277
SMEL4.1_06g024350.1.01	155.82	-1.35426	0.497961	-2.7196	0.00653609	0.0346136
SMEL4.1_06g024710.1.01	111.389	-5.1017	0.453026	-11.2614	2.03568e-29	8.87863e-27
SMEL4.1_06g025000.1.01	521.037	-2.89283	0.442924	-6.53121	6.52386e-11	4.4617e-09
SMEL4.1_06g025350.1.01	4341.5	-1.60702	0.271087	-5.92805	3.06554e-09	1.42869e-07
SMEL4.1_06g025420.1.01	2167.54	-1.62034	0.489257	-3.31184	0.00092686	0.00763
SMEL4.1_06g025640.1.01	4437.5	-2.61575	0.38823	-6.73763	1.60985e-11	1.23146e-09
SMEL4.1_06g025880.1.01	2872.18	-2.80937	0.534075	-5.26024	1.43868e-07	4.53703e-06
SMEL4.1_06g025940.1.01	48.0249	-3.77389	1.02679	-3.67544	0.000237439	0.00254104
SMEL4.1_06g026070.1.01	93.3733	-1.10737	0.263824	-4.19737	2.70035e-05	0.000415311
SMEL4.1_06g026160.1.01	112.961	-5.13158	0.762308	-6.73163	1.67773e-11	1.27155e-09
SMEL4.1_06g026500.1.01	970.022	-1.08633	0.271614	-3.99954	6.34659e-05	0.000851467
SMEL4.1_06g026730.1.01	133.253	-1.8062	0.603675	-2.99201	0.00277143	0.0178901
SMEL4.1_06g027050.1.01	7.67447	-2.95515	1.0156	-2.90977	0.00361692	0.0219515
SMEL4.1_06g027220.1.01	286.474	-3.81353	0.72579	-5.25432	1.48574e-07	4.6474e-06
SMEL4.1_06g027230.1.01	1165.93	-2.04893	0.492345	-4.16157	3.16069e-05	0.000476598
SMEL4.1_06g027460.1.01	3177.37	-1.04117	0.355042	-2.93253	0.00336215	0.0207806
SMEL4.1_06g027530.1.01	3759.96	-4.16803	0.664545	-6.27201	3.56407e-10	2.10716e-08
SMEL4.1_06g027630.1.01	197.885	-2.25003	0.457399	-4.91919	8.69034e-07	2.27246e-05
SMEL4.1_06g027780.1.01	28.6474	-1.61984	0.479929	-3.37518	0.000737686	0.00634388
SMEL4.1_06g027990.1.01	13.7865	-3.64817	0.933321	-3.9088	9.27551e-05	0.00116592
SMEL4.1_06g028000.1.01	4964.82	-2.27649	0.432323	-5.26573	1.39634e-07	4.42768e-06
SMEL4.1_06g028290.1.01	136.049	-1.3026	0.280916	-4.63699	3.53526e-06	7.51113e-05
SMEL4.1_06g028670.1.01	4746.4	-1.46322	0.547953	-2.67034	0.00757748	0.038847
SMEL4.1_06g029250.1.01	15.1714	-2.30482	0.865001	-2.66453	0.00770965	0.0393848
SMEL4.1_06g029350.1.01	331.339	-1.24667	0.212065	-5.87872	4.13455e-09	1.87401e-07
SMEL4.1_06g029990.1.01	320.114	-2.20271	0.387119	-5.69	1.27037e-08	5.2439e-07
SMEL4.1_06g030040.1.01	34.6635	-2.42851	0.577917	-4.20217	2.64369e-05	0.000407535
SMEL4.1_06g030250.1.01	660.909	-3.42055	0.619781	-5.51896	3.41005e-08	1.28174e-06
SMEL4.1_06g030370.1.01	1130.88	-1.0377	0.297082	-3.49297	0.000477677	0.00447587
SMEL4.1_06g030450.1.01	6.68599	-3.10744	1.09075	-2.84889	0.00438715	0.0255643
SMEL4.1_07g000100.1.01	125.241	-5.76283	0.483519	-11.9185	9.47809e-33	4.66161e-30
SMEL4.1_07g000130.1.01	284.027	-1.79915	0.678843	-2.65032	0.00804148	0.0405778
SMEL4.1_07g000360.1.01	115.413	-2.28406	0.297247	-7.68403	1.54158e-14	1.93669e-12
SMEL4.1_07g000370.1.01	211.088	-3.66628	0.304744	-12.0307	2.45053e-33	1.25881e-30
SMEL4.1_07g000590.1.01	145.46	-3.09724	0.673207	-4.60072	4.21039e-06	8.72038e-05
SMEL4.1_07g000820.1.01	152.864	-3.1542	0.950128	-3.31977	0.00090093	0.00745379
SMEL4.1_07g001380.1.01	8.06945	-2.69679	1.02839	-2.62233	0.00873311	0.0431725
SMEL4.1_07g001520.1.01	315.744	-1.69704	0.233458	-7.26914	3.6178e-13	3.66795e-11
SMEL4.1_07g001550.1.01	614.585	-2.02406	0.313634	-6.45359	1.09229e-10	7.11251e-09
SMEL4.1_07g001610.1.01	199.654	-1.26404	0.332787	-3.79835	0.000145664	0.0016878
SMEL4.1_07g001720.1.01	582.493	-2.21463	0.463501	-4.77805	1.77007e-06	4.22258e-05
SMEL4.1_07g001910.1.01	38.0097	-3.04218	1.06947	-2.84457	0.00444717	0.0258358
SMEL4.1_07g002110.1.01	49.4379	-1.76343	0.610896	-2.88662	0.00389403	0.0232956
SMEL4.1_07g002130.1.01	955.079	-2.70446	0.339234	-7.97225	1.5581e-15	2.1567e-13
SMEL4.1_07g002140.1.01	12.6068	-5.1575	1.582	-3.26013	0.00111363	0.00879489
SMEL4.1_07g002150.1.01	231.507	-4.89975	0.616922	-7.94226	1.98528e-15	2.71549e-13
SMEL4.1_07g002440.1.01	3928.68	-1.74187	0.530154	-3.28559	0.0010177	0.00818429
SMEL4.1_07g002500.1.01	1024.23	-2.14803	0.24966	-8.60379	7.71234e-18	1.3609e-15
SMEL4.1_07g002510.1.01	24.9824	-3.67579	0.919732	-3.99659	6.42623e-05	0.000860155
SMEL4.1_07g002560.1.01	290.562	-1.82032	0.244916	-7.43241	1.06639e-13	1.15731e-11
SMEL4.1_07g003290.1.01	1109.36	-1.03931	0.275334	-3.77471	0.000160194	0.00183592
SMEL4.1_07g003350.1.01	5441.48	-2.96229	0.193114	-15.3395	4.16074e-53	4.3718e-50
SMEL4.1_07g003540.1.01	2124.4	-1.13745	0.19074	-5.96335	2.47114e-09	1.17779e-07
SMEL4.1_07g004120.1.01	33.7288	-1.16204	0.384555	-3.02178	0.00251294	0.0165685
SMEL4.1_07g004140.1.01	161.314	-1.03397	0.399996	-2.58496	0.00973914	0.0468479
SMEL4.1_07g004390.1.01	50.9059	-9.0454	1.23747	-7.30957	2.68e-13	2.74119e-11
SMEL4.1_07g004400.1.01	345.496	-2.63221	0.408841	-6.43822	1.20882e-10	7.7836e-09
SMEL4.1_07g004790.1.01	19.4826	-6.68492	1.31359	-5.08904	3.59874e-07	1.03856e-05
SMEL4.1_07g006020.1.01	59.8359	-3.49613	0.564737	-6.19072	5.98899e-10	3.32792e-08
SMEL4.1_07g006440.1.01	2907.22	-1.49877	0.352201	-4.25543	2.08649e-05	0.000335638
SMEL4.1_07g007050.1.01	1957.44	-1.57669	0.254712	-6.19008	6.01331e-10	3.33342e-08
SMEL4.1_07g007200.1.01	1377.12	-1.33551	0.341318	-3.91278	9.12381e-05	0.00115145
SMEL4.1_07g007430.1.01	39.6305	-2.79784	0.992182	-2.81988	0.00480411	0.0274337
SMEL4.1_07g008440.1.01	662.29	-2.27387	0.509368	-4.46411	8.04017e-06	0.000150558
SMEL4.1_07g009170.1.01	131.089	-1.18186	0.248208	-4.76155	1.92111e-06	4.48569e-05
SMEL4.1_07g009190.1.01	213.911	-1.27551	0.226491	-5.63164	1.78509e-08	7.22663e-07
SMEL4.1_07g010180.1.01	8.08495	-6.38755	1.5437	-4.13781	3.50631e-05	0.000519563
SMEL4.1_07g010270.1.01	51.3866	-3.46711	0.716282	-4.84043	1.29561e-06	3.17932e-05
SMEL4.1_07g010300.1.01	3694.22	-1.76393	0.440732	-4.00227	6.27375e-05	0.000846114
SMEL4.1_07g010360.1.01	688.461	-1.13407	0.422716	-2.68281	0.00730059	0.0376194
SMEL4.1_07g010580.1.01	32.1718	-1.50963	0.449609	-3.35765	0.000786078	0.00666336
SMEL4.1_07g010780.1.01	422.024	-1.02179	0.269545	-3.7908	0.000150161	0.00173383
SMEL4.1_07g010830.1.01	29.2113	-8.24171	1.33197	-6.18761	6.10839e-10	3.37803e-08
SMEL4.1_07g010900.1.01	104.566	-8.22243	1.06335	-7.73258	1.05386e-14	1.33852e-12
SMEL4.1_07g011250.1.01	4.1365	-5.42227	1.5979	-3.39336	0.000690408	0.00602927
SMEL4.1_07g011680.1.01	2968.98	-1.38638	0.480452	-2.88558	0.00390688	0.0233665
SMEL4.1_07g011690.1.01	568.136	-2.62824	0.880309	-2.98559	0.0028303	0.0181837
SMEL4.1_07g011720.1.01	434.018	-1.30961	0.393732	-3.32616	0.000880524	0.00732165
SMEL4.1_07g012550.1.01	396.08	-1.67322	0.461955	-3.62204	0.000292293	0.00298044
SMEL4.1_07g013090.1.01	16.4692	-1.70055	0.643212	-2.64384	0.00819703	0.0411829
SMEL4.1_07g013120.1.01	773.094	-1.05393	0.195503	-5.3909	7.01071e-08	2.4188e-06
SMEL4.1_07g013200.1.01	7.16432	-2.84136	1.09054	-2.60546	0.00917518	0.044897
SMEL4.1_07g013370.1.01	3281.56	-1.3616	0.437055	-3.11539	0.00183701	0.0129821
SMEL4.1_07g013550.1.01	1712.62	-2.63727	0.558966	-4.71812	2.3803e-06	5.39441e-05
SMEL4.1_07g013650.1.01	880.848	-1.6872	0.457027	-3.69168	0.000222779	0.00241773
SMEL4.1_07g013660.1.01	23.3232	-4.94013	1.19053	-4.14952	3.33176e-05	0.000498815
SMEL4.1_07g013710.1.01	5.72275	-3.89451	1.3547	-2.87481	0.00404266	0.02398
SMEL4.1_07g014210.1.01	1650.66	-1.17551	0.316149	-3.71821	0.000200636	0.00221485
SMEL4.1_07g014290.1.01	35.6339	-2.00806	0.519572	-3.86483	0.000111167	0.00135606
SMEL4.1_07g014460.1.01	648.167	-1.12886	0.217413	-5.19222	2.07801e-07	6.30386e-06
SMEL4.1_07g014600.1.01	100.649	-1.08388	0.264448	-4.09863	4.15595e-05	0.000600807
SMEL4.1_07g014630.1.01	101.645	-2.93825	0.473845	-6.20087	5.61532e-10	3.13536e-08
SMEL4.1_07g014750.1.01	1382.71	-2.09105	0.319985	-6.53486	6.36708e-11	4.37964e-09
SMEL4.1_07g015050.1.01	8.40431	-4.56832	1.62704	-2.80775	0.0049889	0.0281964
SMEL4.1_07g015060.1.01	349.353	-2.97495	0.804619	-3.69734	0.00021787	0.00237225
SMEL4.1_07g015210.1.01	1236.71	-1.92105	0.606179	-3.16912	0.00152901	0.0113139
SMEL4.1_07g015730.1.01	3723.39	-1.14921	0.36243	-3.17086	0.00151987	0.0112679
SMEL4.1_07g016310.1.01	1245.29	-4.23287	0.49388	-8.57065	1.02904e-17	1.78852e-15
SMEL4.1_07g016320.1.01	1704.08	-2.17359	0.345006	-6.30015	2.97351e-10	1.78999e-08
SMEL4.1_07g016570.1.01	4.87866	-5.66568	1.71084	-3.31163	0.000927556	0.00763038
SMEL4.1_07g016760.1.01	34.9466	-4.99088	0.854193	-5.84281	5.1328e-09	2.26e-07
SMEL4.1_07g016790.1.01	660.598	-2.30784	0.663068	-3.48054	0.000500398	0.00463987
SMEL4.1_07g017100.1.01	3.21792	-5.06554	1.8067	-2.80375	0.00505113	0.0284716
SMEL4.1_07g017130.1.01	718.826	-2.47505	0.145984	-16.9543	1.79026e-64	3.44864e-61
SMEL4.1_07g017610.1.01	41.6812	-2.7053	0.850252	-3.18176	0.00146383	0.0109402
SMEL4.1_07g017910.1.01	1699.26	-1.36885	0.497112	-2.7536	0.00589434	0.0320112
SMEL4.1_07g017980.1.01	55.9501	-2.72168	0.976404	-2.78746	0.00531236	0.0295407
SMEL4.1_07g018460.1.01	199.046	-2.19693	0.33824	-6.49519	8.29297e-11	5.58893e-09
SMEL4.1_07g018530.1.01	717.708	-1.43309	0.456549	-3.13897	0.00169544	0.0122093
SMEL4.1_07g019060.1.01	1621.63	-1.21895	0.31218	-3.90465	9.43616e-05	0.00118483
SMEL4.1_07g019430.1.01	814.423	-2.05383	0.322086	-6.37664	1.81021e-10	1.12789e-08
SMEL4.1_07g019500.1.01	7591.38	-2.13533	0.645681	-3.30709	0.000942702	0.00771279
SMEL4.1_07g019990.1.01	43.8917	-8.83002	1.27083	-6.94822	3.69919e-12	3.21468e-10
SMEL4.1_07g020040.1.01	53.0469	-5.59127	1.07209	-5.2153	1.83524e-07	5.62645e-06
SMEL4.1_07g020110.1.01	37.2694	-2.95052	0.729493	-4.04462	5.24081e-05	0.000728483
SMEL4.1_07g020470.1.01	43.1246	-2.70941	0.887183	-3.05394	0.00225855	0.0152282
SMEL4.1_07g020590.1.01	734.102	-1.40973	0.233892	-6.02727	1.66754e-09	8.30753e-08
SMEL4.1_07g020770.1.01	7.02184	-2.83831	0.977422	-2.90387	0.0036858	0.0222573
SMEL4.1_07g020780.1.01	409.719	-1.3276	0.382253	-3.4731	0.000514483	0.00475711
SMEL4.1_07g020820.1.01	66.3384	-1.80214	0.547511	-3.29151	0.000996502	0.00805988
SMEL4.1_07g020970.1.01	102.544	-1.25734	0.264318	-4.75695	1.96545e-06	4.56157e-05
SMEL4.1_07g021060.1.01	7492.49	-1.89189	0.392465	-4.82054	1.43173e-06	3.47646e-05
SMEL4.1_07g021320.1.01	642.883	-1.55189	0.40407	-3.84066	0.000122704	0.00146661
SMEL4.1_07g021380.1.01	111.551	-2.57837	0.651639	-3.95675	7.59776e-05	0.000989463
SMEL4.1_07g021650.1.01	11.6756	-3.92828	1.12195	-3.50129	0.000463017	0.00435794
SMEL4.1_07g021670.1.01	179.355	-3.28946	0.585597	-5.61729	1.93979e-08	7.78474e-07
SMEL4.1_07g021810.1.01	78.8262	-3.28916	0.336496	-9.77474	1.44527e-22	3.97724e-20
SMEL4.1_07g022040.1.01	339.49	-1.09937	0.418259	-2.62843	0.00857788	0.0426422
SMEL4.1_07g022170.1.01	1796.82	-1.19175	0.15582	-7.64825	2.03729e-14	2.53194e-12
SMEL4.1_07g022280.1.01	23.0554	-1.86911	0.616454	-3.03204	0.0024291	0.0161168
SMEL4.1_07g022290.1.01	15722.8	-2.44988	0.456846	-5.3626	8.20306e-08	2.77225e-06
SMEL4.1_07g022740.1.01	2114.5	-1.04367	0.329001	-3.17224	0.00151266	0.0112298
SMEL4.1_07g023050.1.01	237.258	-1.78284	0.195203	-9.13326	6.6468e-20	1.49172e-17
SMEL4.1_07g023080.1.01	1010.67	-2.11627	0.527582	-4.01127	6.03939e-05	0.000820732
SMEL4.1_07g023140.1.01	27.1647	-1.96744	0.74759	-2.63172	0.0084955	0.0423785
SMEL4.1_07g023290.1.01	1289.75	-1.34463	0.505096	-2.66212	0.00776496	0.0395712
SMEL4.1_07g023310.1.01	55.9239	-2.2056	0.708116	-3.11475	0.00184103	0.0129986
SMEL4.1_07g023420.1.01	33.1597	-2.98924	1.16865	-2.55785	0.010532	0.0495944
SMEL4.1_07g023510.1.01	265.453	-1.74705	0.475198	-3.67647	0.000236488	0.00253438
SMEL4.1_07g023610.1.01	13455.8	-2.28418	0.402867	-5.66981	1.42952e-08	5.86943e-07
SMEL4.1_07g023670.1.01	507.604	-1.18512	0.234678	-5.04998	4.41858e-07	1.25018e-05
SMEL4.1_07g023950.1.01	175.342	-1.0203	0.292129	-3.49265	0.000478255	0.00447766
SMEL4.1_07g024270.1.01	1459.73	-3.40847	0.874153	-3.89917	9.65215e-05	0.0012067
SMEL4.1_07g024280.1.01	1651.01	-1.62485	0.347444	-4.67659	2.91679e-06	6.397e-05
SMEL4.1_07g024330.1.01	349.55	-1.40757	0.265295	-5.30567	1.12259e-07	3.65489e-06
SMEL4.1_07g024350.1.01	163.186	-1.96449	0.314342	-6.24953	4.11688e-10	2.37242e-08
SMEL4.1_07g024400.1.01	10.8159	-2.05453	0.790529	-2.59893	0.00935152	0.0454993
SMEL4.1_07g024430.1.01	66.1403	-5.19171	0.73978	-7.01791	2.25211e-12	1.98702e-10
SMEL4.1_07g024770.1.01	1248.82	-1.28162	0.269054	-4.76345	1.90313e-06	4.46628e-05
SMEL4.1_07g024990.1.01	88.9788	-1.18919	0.297117	-4.00242	6.2697e-05	0.000846061
SMEL4.1_07g025880.1.01	4293.8	-1.19245	0.430296	-2.77123	0.00558452	0.0306567
SMEL4.1_07g025890.1.01	1060.68	-1.81539	0.380689	-4.76869	1.85424e-06	4.37373e-05
SMEL4.1_07g026180.1.01	998.566	-1.20335	0.266363	-4.5177	6.25142e-06	0.00012061
SMEL4.1_08g000510.1.01	326.556	-2.40172	0.406451	-5.90899	3.44202e-09	1.59451e-07
SMEL4.1_08g000670.1.01	34.6669	-4.11763	0.760207	-5.41645	6.07929e-08	2.1357e-06
SMEL4.1_08g001230.1.01	414.14	-1.46273	0.361474	-4.04655	5.19772e-05	0.000724722
SMEL4.1_08g001270.1.01	16.5635	-5.46208	1.65606	-3.29824	0.000972935	0.00790778
SMEL4.1_08g001280.1.01	717.045	-2.44841	0.837346	-2.92401	0.00345553	0.0211893
SMEL4.1_08g001300.1.01	1198.62	-5.09351	0.493531	-10.3205	5.68993e-25	1.93424e-22
SMEL4.1_08g001310.1.01	3085.82	-2.003	0.578288	-3.46368	0.000532849	0.00488202
SMEL4.1_08g001320.1.01	65.948	-3.82929	0.773599	-4.94997	7.42241e-07	1.96537e-05
SMEL4.1_08g001480.1.01	7.24662	-3.65379	1.09539	-3.33559	0.00085118	0.00711437
SMEL4.1_08g001890.1.01	154.665	-2.40127	0.630915	-3.80601	0.000141226	0.00164628
SMEL4.1_08g001940.1.01	41.6255	-1.87252	0.558431	-3.35318	0.00079888	0.00675207
SMEL4.1_08g001950.1.01	20.9443	-4.29178	1.1243	-3.81728	0.000134933	0.00159058
SMEL4.1_08g002150.1.01	39.7639	-2.2281	0.56969	-3.91108	9.18855e-05	0.00115751
SMEL4.1_08g002170.1.01	429.17	-1.33837	0.398296	-3.36025	0.000778719	0.00661796
SMEL4.1_08g002180.1.01	158.894	-1.42211	0.441256	-3.22287	0.00126915	0.00973059
SMEL4.1_08g002350.1.01	34.5607	-2.77406	0.717149	-3.86818	0.00010965	0.00134181
SMEL4.1_08g002450.1.01	1922.86	-1.86083	0.407057	-4.57141	4.8445e-06	9.73787e-05
SMEL4.1_08g002530.1.01	153.477	-4.17708	0.795943	-5.24797	1.53783e-07	4.78445e-06
SMEL4.1_08g002680.1.01	124.096	-1.46884	0.47359	-3.10151	0.00192538	0.0134788
SMEL4.1_08g002690.1.01	206.356	-1.27727	0.269761	-4.73484	2.19228e-06	5.00759e-05
SMEL4.1_08g003530.1.01	22.0433	-3.15862	0.695412	-4.54208	5.57027e-06	0.000109399
SMEL4.1_08g003800.1.01	101.378	-1.00116	0.258967	-3.86597	0.00011065	0.00135119
SMEL4.1_08g003820.1.01	398.191	-1.71874	0.429929	-3.99772	6.39558e-05	0.000857044
SMEL4.1_08g003870.1.01	974.07	-2.81251	0.162197	-17.3401	2.34326e-67	5.41668e-64
SMEL4.1_08g004120.1.01	41.5969	-1.03105	0.392901	-2.62418	0.00868566	0.0430207
SMEL4.1_08g004280.1.01	33.5087	-3.36822	0.562609	-5.98679	2.14029e-09	1.03939e-07
SMEL4.1_08g004400.1.01	87.7183	-8.86529	2.35437	-3.76546	0.000166241	0.00189395
SMEL4.1_08g004840.1.01	57.9981	-1.33626	0.321637	-4.15457	3.25901e-05	0.000488873
SMEL4.1_08g004930.1.01	724.878	-1.18459	0.300495	-3.94214	8.07562e-05	0.00103913
SMEL4.1_08g005120.1.01	556.009	-1.85055	0.23396	-7.90969	2.5803e-15	3.46956e-13
SMEL4.1_08g005650.1.01	57.0136	-1.15121	0.297527	-3.86926	0.000109168	0.00133732
SMEL4.1_08g005750.1.01	31.8462	-4.63686	0.868205	-5.34074	9.25654e-08	3.09659e-06
SMEL4.1_08g007530.1.01	22.3286	-7.85548	1.9882	-3.95106	7.78067e-05	0.0010093
SMEL4.1_08g007580.1.01	13.7978	-2.23042	0.781019	-2.85578	0.00429311	0.0251014
SMEL4.1_08g007810.1.01	2070.32	-1.50209	0.47768	-3.14454	0.00166348	0.0120467
SMEL4.1_08g007840.1.01	1468.67	-1.81208	0.537376	-3.37209	0.000745993	0.00638681
SMEL4.1_08g007850.1.01	3639.35	-1.51752	0.575649	-2.6362	0.00838413	0.0419497
SMEL4.1_08g009120.1.01	18.8174	-1.44756	0.563876	-2.56717	0.0102533	0.0487166
SMEL4.1_08g009130.1.01	270.391	-1.03618	0.291972	-3.54888	0.00038687	0.00377137
SMEL4.1_08g009600.1.01	3141.43	-1.97814	0.627094	-3.15446	0.00160796	0.0117328
SMEL4.1_08g009650.1.01	8909.65	-2.13086	0.50201	-4.24467	2.1892e-05	0.000349485
SMEL4.1_08g010450.1.01	111.911	-8.28314	2.54165	-3.25896	0.00111823	0.0088208
SMEL4.1_08g010670.1.01	6.20498	-5.00578	1.40909	-3.55249	0.000381602	0.00373301
SMEL4.1_08g010830.1.01	194.257	-1.11152	0.382108	-2.90892	0.00362677	0.0219928
SMEL4.1_08g010930.1.01	10.8224	-4.21722	1.34913	-3.12588	0.00177275	0.0126556
SMEL4.1_08g011310.1.01	185.161	-1.26691	0.329199	-3.84846	0.000118861	0.00142806
SMEL4.1_08g011650.1.01	52.1566	-1.03459	0.37114	-2.7876	0.00530999	0.0295407
SMEL4.1_08g012830.1.01	409.212	-1.42088	0.401236	-3.54127	0.000398204	0.00386111
SMEL4.1_08g013010.1.01	851.41	-1.83708	0.341046	-5.3866	7.18034e-08	2.46628e-06
SMEL4.1_08g013160.1.01	1327.57	-2.94219	0.533056	-5.51947	3.40031e-08	1.28174e-06
SMEL4.1_08g013190.1.01	27.3276	-2.72498	0.641021	-4.25099	2.12827e-05	0.000340935
SMEL4.1_08g013320.1.01	1066.76	-1.09253	0.306389	-3.56582	0.000362717	0.00357551
SMEL4.1_08g013550.1.01	533.041	-1.2585	0.375468	-3.35183	0.000802801	0.00678025
SMEL4.1_08g013800.1.01	134.241	-1.34985	0.340071	-3.96933	7.20748e-05	0.000946637
SMEL4.1_08g014070.1.01	430.11	-1.99425	0.545629	-3.65495	0.000257233	0.00270282
SMEL4.1_08g014100.1.01	205.235	-2.09827	0.466005	-4.50267	6.71037e-06	0.000127879
SMEL4.1_08g014230.1.01	8.23201	-3.48302	1.26469	-2.75406	0.00588609	0.0319847
SMEL4.1_08g014260.1.01	67.0618	-4.45737	0.883216	-5.04675	4.49393e-07	1.26995e-05
SMEL4.1_08g014430.1.01	29.0966	-1.68652	0.490798	-3.43628	0.000589761	0.00529855
SMEL4.1_08g015190.1.01	38.9371	-1.488	0.552265	-2.69435	0.00705252	0.0366846
SMEL4.1_08g016710.1.01	310.012	-2.20276	0.702138	-3.13721	0.00170563	0.0122712
SMEL4.1_08g016720.1.01	315.105	-2.87829	0.652117	-4.41376	1.01588e-05	0.000184616
SMEL4.1_08g016870.1.01	281.695	-2.1188	0.596449	-3.55236	0.00038179	0.00373328
SMEL4.1_08g018170.1.01	32.6867	-3.90024	1.03516	-3.76777	0.000164713	0.00187932
SMEL4.1_08g018350.1.01	28.19	-2.82518	0.770459	-3.66688	0.000245524	0.00261013
SMEL4.1_08g018360.1.01	12.9211	-1.86036	0.599823	-3.10151	0.00192535	0.0134788
SMEL4.1_08g018430.1.01	332.44	-1.20432	0.314108	-3.83408	0.000126036	0.00150093
SMEL4.1_08g018570.1.01	6600.82	-1.30576	0.338186	-3.86107	0.000112889	0.00136913
SMEL4.1_08g018630.1.01	442.192	-1.79116	0.599599	-2.98727	0.00281484	0.0181147
SMEL4.1_08g018870.1.01	408.931	-2.09082	0.309215	-6.76171	1.36373e-11	1.06141e-09
SMEL4.1_08g018890.1.01	17.5163	-3.74705	0.846206	-4.42805	9.50878e-06	0.000174726
SMEL4.1_08g018900.1.01	15.239	-2.70056	0.809595	-3.33569	0.000850889	0.00711437
SMEL4.1_08g019030.1.01	2134.86	-1.55679	0.560903	-2.77551	0.0055116	0.0303492
SMEL4.1_08g019170.1.01	898.158	-1.14124	0.405628	-2.81352	0.00490029	0.0278393
SMEL4.1_08g019190.1.01	24.203	-2.64398	0.606767	-4.35748	1.31566e-05	0.000228495
SMEL4.1_08g019210.1.01	18.9566	-2.72265	0.655569	-4.15312	3.2798e-05	0.000491672
SMEL4.1_08g019250.1.01	27.4504	-2.71585	0.678617	-4.00204	6.27985e-05	0.000846374
SMEL4.1_08g019580.1.01	1152.72	-1.48494	0.429116	-3.46046	0.000539251	0.00493091
SMEL4.1_08g019670.1.01	71.7543	-1.67054	0.378482	-4.41378	1.01579e-05	0.000184616
SMEL4.1_08g019680.1.01	832.554	-1.1912	0.375	-3.17652	0.00149053	0.0111002
SMEL4.1_08g019860.1.01	1057.7	-1.31001	0.275253	-4.75931	1.94255e-06	4.51297e-05
SMEL4.1_08g019910.1.01	531.093	-2.03293	0.610514	-3.32987	0.00086887	0.00723776
SMEL4.1_08g020340.1.01	142.312	-1.16808	0.440187	-2.6536	0.00796377	0.0402771
SMEL4.1_08g020520.1.01	518.495	-2.13455	0.308732	-6.91392	4.7144e-12	3.99187e-10
SMEL4.1_08g020560.1.01	124.089	-1.88639	0.552793	-3.41247	0.000643777	0.00568215
SMEL4.1_08g020640.1.01	69.6864	-3.30027	0.854258	-3.86331	0.000111859	0.00136235
SMEL4.1_08g020660.1.01	10796.2	-1.084	0.258728	-4.18972	2.79304e-05	0.000428142
SMEL4.1_08g020840.1.01	104.749	-1.26066	0.364963	-3.45423	0.000551875	0.0050225
SMEL4.1_08g020850.1.01	435.817	-4.08633	0.406701	-10.0475	9.42221e-24	2.9433e-21
SMEL4.1_08g021090.1.01	462.205	-1.61441	0.369757	-4.36614	1.26463e-05	0.000220961
SMEL4.1_08g021250.1.01	3692.4	-1.33387	0.330605	-4.03462	5.46899e-05	0.000753853
SMEL4.1_08g021380.1.01	70.7933	-2.3077	0.548912	-4.20414	2.62074e-05	0.000405495
SMEL4.1_08g021820.1.01	1976.75	-1.03403	0.360078	-2.87169	0.00408286	0.0241689
SMEL4.1_08g021980.1.01	18.6	-1.6327	0.515225	-3.1689	0.00153017	0.0113158
SMEL4.1_08g022030.1.01	400.459	-1.50249	0.327306	-4.59046	4.42262e-06	9.06641e-05
SMEL4.1_08g022490.1.01	282.022	-5.54489	0.559675	-9.90735	3.86774e-23	1.14157e-20
SMEL4.1_08g022600.1.01	8.523	-2.58357	0.804301	-3.2122	0.00131725	0.0100427
SMEL4.1_08g022740.1.01	1442.31	-2.04308	0.374607	-5.45394	4.9265e-08	1.77385e-06
SMEL4.1_08g022860.1.01	217.403	-1.85353	0.483824	-3.831	0.000127623	0.00151677
SMEL4.1_08g022930.1.01	166.992	-2.47009	0.323021	-7.64684	2.05978e-14	2.5462e-12
SMEL4.1_08g022990.1.01	5503.22	-2.19906	0.157777	-13.9378	3.73386e-44	3.08257e-41
SMEL4.1_08g023020.1.01	86.2013	-2.51994	0.467101	-5.39484	6.85836e-08	2.37332e-06
SMEL4.1_08g023200.1.01	446.035	-3.01503	0.315875	-9.54501	1.36088e-21	3.61589e-19
SMEL4.1_08g023270.1.01	1113.89	-2.20782	0.726591	-3.0386	0.00237676	0.0158537
SMEL4.1_08g023380.1.01	9444.23	-4.43197	0.631074	-7.0229	2.1731e-12	1.92465e-10
SMEL4.1_08g023460.1.01	1239.15	-3.68954	0.519136	-7.10708	1.1852e-12	1.11443e-10
SMEL4.1_08g023470.1.01	71.9004	-4.35862	0.575658	-7.57155	3.6879e-14	4.30553e-12
SMEL4.1_08g023520.1.01	24.6078	-2.54484	0.554995	-4.58533	4.5327e-06	9.22513e-05
SMEL4.1_08g023670.1.01	1409.86	-1.18611	0.460235	-2.57718	0.00996107	0.0476433
SMEL4.1_08g023980.1.01	3904.68	-1.28991	0.156815	-8.2257	1.9406e-16	2.95124e-14
SMEL4.1_08g024280.1.01	361.32	-2.42852	0.772441	-3.14396	0.00166677	0.0120629
SMEL4.1_08g024300.1.01	1643.7	-1.63665	0.417356	-3.92147	8.80106e-05	0.00111477
SMEL4.1_08g024590.1.01	189.454	-1.519	0.449678	-3.37798	0.000730201	0.00630061
SMEL4.1_08g024870.1.01	6168.25	-1.25993	0.472225	-2.66807	0.00762889	0.0390327
SMEL4.1_08g025190.1.01	142.498	-5.95154	0.874347	-6.80684	9.9768e-12	8.03567e-10
SMEL4.1_08g025320.1.01	359.038	-1.08243	0.178488	-6.06446	1.324e-09	6.72653e-08
SMEL4.1_08g025410.1.01	201.344	-1.9147	0.471646	-4.05962	4.91521e-05	0.000693651
SMEL4.1_08g025470.1.01	20.3343	-1.82936	0.564572	-3.24026	0.00119421	0.00930103
SMEL4.1_08g025580.1.01	94.2296	-2.56903	0.626285	-4.10202	4.09561e-05	0.000593568
SMEL4.1_08g025650.1.01	1525.85	-1.15529	0.261337	-4.42071	9.83778e-06	0.000179487
SMEL4.1_08g025760.1.01	2253.38	-1.77817	0.161527	-11.0085	3.4791e-28	1.41093e-25
SMEL4.1_08g026000.1.01	109.205	-3.90855	0.785774	-4.97414	6.55388e-07	1.77816e-05
SMEL4.1_08g026020.1.01	658.532	-2.20786	0.398228	-5.54422	2.95263e-08	1.13566e-06
SMEL4.1_08g026200.1.01	434.442	-3.25097	0.616689	-5.27165	1.35206e-07	4.29907e-06
SMEL4.1_08g026220.1.01	11396	-1.26835	0.373869	-3.3925	0.000692586	0.0060401
SMEL4.1_08g026290.1.01	44.9649	-1.49855	0.560786	-2.67223	0.00753488	0.0386543
SMEL4.1_08g026300.1.01	451.673	-2.72713	0.636173	-4.28677	1.81291e-05	0.0002977
SMEL4.1_08g026310.1.01	306.048	-1.47434	0.53508	-2.75536	0.00586274	0.0318978
SMEL4.1_08g026340.1.01	565.084	-1.86132	0.305487	-6.09296	1.10845e-09	5.78394e-08
SMEL4.1_08g026580.1.01	63.2212	-1.47567	0.526753	-2.80144	0.00508747	0.0286124
SMEL4.1_08g026700.1.01	297.668	-1.74998	0.545261	-3.20944	0.00132995	0.0101273
SMEL4.1_08g026710.1.01	108.776	-2.71058	0.791359	-3.42521	0.000614314	0.00547858
SMEL4.1_08g026780.1.01	545.689	-2.96204	0.482612	-6.13751	8.38236e-10	4.47498e-08
SMEL4.1_09g000190.1.01	376.028	-1.96641	0.383472	-5.12793	2.92949e-07	8.58279e-06
SMEL4.1_09g000220.1.01	495.32	-1.69058	0.304442	-5.55304	2.8074e-08	1.08748e-06
SMEL4.1_09g000360.1.01	6.85338	-4.24247	1.35827	-3.12344	0.00178748	0.0127266
SMEL4.1_09g000440.1.01	23.9242	-2.09897	0.742804	-2.82573	0.00471724	0.0270372
SMEL4.1_09g001010.1.01	172.812	-1.23134	0.358877	-3.43109	0.000601171	0.00538101
SMEL4.1_09g001430.1.01	286.426	-2.75274	0.783164	-3.5149	0.000439921	0.00418486
SMEL4.1_09g001610.1.01	38.6439	-3.12967	1.06794	-2.93056	0.00338349	0.020879
SMEL4.1_09g001730.1.01	312.415	-6.09604	1.91858	-3.17738	0.00148613	0.0110746
SMEL4.1_09g002460.1.01	27.3922	-2.80636	0.662602	-4.23537	2.2818e-05	0.00036078
SMEL4.1_09g002470.1.01	1066.92	-2.59356	0.909379	-2.85202	0.00434429	0.0253528
SMEL4.1_09g002570.1.01	8.47298	-3.48807	1.00164	-3.48237	0.000497004	0.00461952
SMEL4.1_09g002710.1.01	180.639	-1.48565	0.408982	-3.63255	0.000280636	0.00289219
SMEL4.1_09g002780.1.01	11.171	-2.62226	0.932012	-2.81355	0.00489978	0.0278393
SMEL4.1_09g002800.1.01	719.398	-2.22362	0.381158	-5.83385	5.41624e-09	2.37125e-07
SMEL4.1_09g003670.1.01	1335.53	-1.34146	0.193583	-6.92966	4.21856e-12	3.59838e-10
SMEL4.1_09g003680.1.01	1907.12	-1.32238	0.485782	-2.72217	0.00648542	0.0343846
SMEL4.1_09g003750.1.01	89.7764	-1.41904	0.318342	-4.45758	8.28913e-06	0.000154401
SMEL4.1_09g003870.1.01	107.31	-2.32144	0.51961	-4.46766	7.90785e-06	0.000148495
SMEL4.1_09g004100.1.01	511.349	-2.90335	0.666427	-4.35659	1.32102e-05	0.000229082
SMEL4.1_09g004120.1.01	124.35	-1.88392	0.697121	-2.70242	0.00688362	0.0360095
SMEL4.1_09g004140.1.01	119.065	-1.89824	0.394121	-4.8164	1.46175e-06	3.53819e-05
SMEL4.1_09g004310.1.01	689.592	-2.00495	0.357356	-5.6105	2.01746e-08	8.05451e-07
SMEL4.1_09g004650.1.01	70.5219	-4.09825	0.631051	-6.49433	8.34051e-11	5.59102e-09
SMEL4.1_09g004660.1.01	7.8121	-5.34642	1.94431	-2.74978	0.00596359	0.0322851
SMEL4.1_09g004850.1.01	769.152	-1.37049	0.423155	-3.23873	0.00120064	0.00934476
SMEL4.1_09g005060.1.01	100.199	-3.2672	0.84401	-3.87105	0.000108368	0.00132982
SMEL4.1_09g005120.1.01	3.54758	-4.16641	1.60085	-2.60262	0.00925141	0.0451553
SMEL4.1_09g005280.1.01	2870.1	-1.56221	0.413856	-3.77476	0.000160159	0.00183592
SMEL4.1_09g005300.1.01	90.5519	-8.91216	1.2173	-7.32124	2.45692e-13	2.52418e-11
SMEL4.1_09g005320.1.01	8.29529	-6.42609	1.4686	-4.37565	1.21074e-05	0.000212832
SMEL4.1_09g005340.1.01	277.211	-1.48246	0.538326	-2.75383	0.00589021	0.0319996
SMEL4.1_09g005380.1.01	1505.44	-3.13311	0.712682	-4.39622	1.10153e-05	0.000198002
SMEL4.1_09g005390.1.01	48.7025	-2.15452	0.814169	-2.64629	0.00813807	0.0409311
SMEL4.1_09g005420.1.01	23.0994	-3.46923	0.925068	-3.75024	0.000176662	0.00198528
SMEL4.1_09g005430.1.01	25.4317	-2.90652	1.10797	-2.62329	0.00870857	0.0430972
SMEL4.1_09g006260.1.01	66.2332	-2.03219	0.601358	-3.37934	0.000726597	0.00627889
SMEL4.1_09g006730.1.01	10.8838	-6.8175	1.88751	-3.6119	0.000303964	0.00308312
SMEL4.1_09g007000.1.01	587.062	-2.13553	0.507996	-4.20383	2.62434e-05	0.000405781
SMEL4.1_09g007050.1.01	187.373	-2.12252	0.445369	-4.76576	1.8814e-06	4.43327e-05
SMEL4.1_09g007280.1.01	18.3858	-3.30644	1.15758	-2.85634	0.00428561	0.0250737
SMEL4.1_09g007550.1.01	205.619	-1.91434	0.353695	-5.41242	6.21776e-08	2.17443e-06
SMEL4.1_09g007560.1.01	108.892	-1.54007	0.417459	-3.68915	0.000225001	0.00243739
SMEL4.1_09g007780.1.01	432.163	-1.96137	0.458112	-4.28141	1.85713e-05	0.000303602
SMEL4.1_09g007890.1.01	15.7245	-1.73227	0.573562	-3.0202	0.00252606	0.0166313
SMEL4.1_09g008530.1.01	48.8378	-1.97365	0.477684	-4.13171	3.6008e-05	0.000531181
SMEL4.1_09g010180.1.01	1040.41	-2.37395	0.533513	-4.44965	8.60099e-06	0.000159439
SMEL4.1_09g010920.1.01	801.043	-1.05205	0.324332	-3.24374	0.00117971	0.0092145
SMEL4.1_09g012320.1.01	232.053	-4.10588	0.626832	-6.55021	5.74576e-11	3.98856e-09
SMEL4.1_09g012410.1.01	156.155	-2.43437	0.78278	-3.1099	0.00187151	0.0131816
SMEL4.1_09g012840.1.01	19.8377	-2.62697	0.631316	-4.1611	3.16713e-05	0.000477257
SMEL4.1_09g012880.1.01	88.2175	-2.06875	0.606161	-3.41287	0.000642836	0.00567601
SMEL4.1_09g012890.1.01	106.184	-1.65525	0.282725	-5.85463	4.78062e-09	2.12109e-07
SMEL4.1_09g013340.1.01	5065.21	-2.19808	0.448448	-4.90154	9.50877e-07	2.44499e-05
SMEL4.1_09g013350.1.01	311.497	-1.17277	0.30586	-3.83432	0.00012591	0.00150028
SMEL4.1_09g013360.1.01	1070.76	-1.11103	0.288264	-3.85421	0.000116104	0.00140003
SMEL4.1_09g013750.1.01	1266.95	-1.81742	0.329132	-5.52187	3.35414e-08	1.27105e-06
SMEL4.1_09g013980.1.01	67.1979	-1.45501	0.462582	-3.1454	0.00165859	0.0120263
SMEL4.1_09g014210.1.01	268.541	-1.90941	0.192793	-9.90398	4.00043e-23	1.15592e-20
SMEL4.1_09g014380.1.01	7.9166	-3.84249	1.08262	-3.54924	0.000386339	0.00377089
SMEL4.1_09g014390.1.01	3.9248	-5.34888	1.62058	-3.3006	0.000964777	0.00784721
SMEL4.1_09g015350.1.01	610.711	-1.45074	0.282619	-5.13321	2.84841e-07	8.37709e-06
SMEL4.1_09g015680.1.01	1543.2	-1.1237	0.293656	-3.8266	0.000129928	0.00153942
SMEL4.1_09g015870.1.01	1626.18	-1.64014	0.373869	-4.38695	1.14953e-05	0.000204562
SMEL4.1_09g015960.1.01	235.113	-1.60013	0.376457	-4.2505	2.13296e-05	0.000341364
SMEL4.1_09g016620.1.01	3.74347	-5.28438	2.00591	-2.63441	0.00842848	0.0421027
SMEL4.1_09g016730.1.01	519.389	-1.34676	0.21638	-6.22404	4.84524e-10	2.74516e-08
SMEL4.1_09g016960.1.01	105.713	-1.86297	0.488546	-3.8133	0.000137126	0.00160741
SMEL4.1_09g016990.1.01	932.828	-1.5554	0.373368	-4.16586	3.10177e-05	0.000468325
SMEL4.1_09g017080.1.01	116.524	-1.29637	0.353856	-3.66355	0.000248748	0.00263281
SMEL4.1_09g017360.1.01	6.75442	-4.15348	1.29657	-3.20343	0.00135802	0.0102823
SMEL4.1_09g017400.1.01	22.7778	-3.50461	0.997475	-3.51348	0.00044228	0.00420212
SMEL4.1_09g017840.1.01	237.597	-2.33273	0.439874	-5.30316	1.13814e-07	3.69511e-06
SMEL4.1_09g017850.1.01	69.4092	-1.06242	0.281817	-3.76991	0.000163309	0.00186422
SMEL4.1_09g017940.1.01	1488.99	-1.67211	0.596819	-2.8017	0.0050834	0.0285977
SMEL4.1_09g018230.1.01	282.044	-1.07819	0.36201	-2.97834	0.00289811	0.0185329
SMEL4.1_09g018240.1.01	74.242	-1.26059	0.372767	-3.3817	0.000720381	0.0062275
SMEL4.1_09g018510.1.01	1128.16	-2.05168	0.478559	-4.2872	1.80938e-05	0.000297479
SMEL4.1_09g019240.1.01	24.628	-3.32395	1.12257	-2.96102	0.00306625	0.019329
SMEL4.1_09g019370.1.01	89.0904	-2.22377	0.39683	-5.60383	2.09666e-08	8.35628e-07
SMEL4.1_09g019380.1.01	440.609	-2.17221	0.663649	-3.27314	0.00106361	0.00845476
SMEL4.1_09g019470.1.01	843.915	-1.46557	0.30779	-4.7616	1.92061e-06	4.48569e-05
SMEL4.1_09g019550.1.01	147.708	-1.99915	0.531859	-3.7588	0.00017073	0.0019365
SMEL4.1_09g019560.1.01	49.4594	-3.17553	0.638634	-4.97239	6.61338e-07	1.78801e-05
SMEL4.1_09g019730.1.01	77.3745	-1.10714	0.361649	-3.06138	0.00220323	0.0149311
SMEL4.1_09g019810.1.01	26.0627	-3.12185	0.966282	-3.23079	0.0012345	0.00953447
SMEL4.1_09g019850.1.01	717.391	-1.3746	0.251273	-5.47055	4.48648e-08	1.62809e-06
SMEL4.1_09g019950.1.01	4450.2	-1.20069	0.392857	-3.05631	0.0022408	0.015121
SMEL4.1_09g020000.1.01	9.51004	-6.62298	1.60181	-4.13469	3.55428e-05	0.000525325
SMEL4.1_09g020180.1.01	109.414	-1.76941	0.633011	-2.79523	0.00518628	0.0290351
SMEL4.1_09g020330.1.01	102.078	-2.65391	1.03318	-2.56868	0.0102087	0.0485862
SMEL4.1_09g020520.1.01	57.3798	-2.24047	0.609608	-3.67526	0.000237605	0.00254164
SMEL4.1_09g020600.1.01	86.8958	-1.86662	0.534469	-3.49247	0.000478573	0.00447854
SMEL4.1_09g020690.1.01	153.383	-4.95301	0.544868	-9.09029	9.87743e-20	2.17454e-17
SMEL4.1_09g020780.1.01	104.795	-1.08798	0.396501	-2.74394	0.00607058	0.0327562
SMEL4.1_09g020890.1.01	641.497	-1.4647	0.294136	-4.97968	6.36897e-07	1.7341e-05
SMEL4.1_09g020900.1.01	41.4077	-1.92373	0.605067	-3.17937	0.00147596	0.0110201
SMEL4.1_09g021000.1.01	92.1813	-2.07318	0.685923	-3.02247	0.0025072	0.0165354
SMEL4.1_09g021140.1.01	85.5655	-1.99007	0.604319	-3.29308	0.000990972	0.00802639
SMEL4.1_09g021260.1.01	753.897	-1.0295	0.393451	-2.6166	0.00888107	0.043765
SMEL4.1_09g021340.1.01	6.45382	-4.11955	1.36994	-3.00709	0.00263758	0.0172525
SMEL4.1_09g021540.1.01	92.9689	-2.39588	0.704887	-3.39896	0.000676426	0.00592058
SMEL4.1_09g021610.1.01	2843.08	-1.96723	0.436704	-4.50473	6.6456e-06	0.00012724
SMEL4.1_09g021640.1.01	2109.42	-1.00267	0.339543	-2.95301	0.00314689	0.0197137
SMEL4.1_09g021680.1.01	1103.72	-1.49398	0.433115	-3.44937	0.000561891	0.0050976
SMEL4.1_09g021740.1.01	48.183	-3.45076	0.575586	-5.99521	2.03218e-09	9.93146e-08
SMEL4.1_09g021850.1.01	4533.16	-1.75726	0.374534	-4.69184	2.70757e-06	6.01345e-05
SMEL4.1_09g021870.1.01	165.239	-4.65622	0.559963	-8.31523	9.15745e-17	1.44002e-14
SMEL4.1_09g022260.1.01	3.41833	-5.1436	1.74325	-2.95058	0.00317178	0.0198374
SMEL4.1_09g022270.1.01	114.067	-2.00984	0.406005	-4.95029	7.41033e-07	1.96442e-05
SMEL4.1_09g022470.1.01	604.386	-1.21525	0.22665	-5.3618	8.23966e-08	2.78055e-06
SMEL4.1_09g022490.1.01	12.7597	-7.04675	1.324	-5.32233	1.02445e-07	3.37633e-06
SMEL4.1_09g022540.1.01	10.9784	-3.23941	1.20876	-2.67994	0.00736349	0.0378928
SMEL4.1_09g023080.1.01	616.896	-1.17688	0.189651	-6.2055	5.45241e-10	3.06661e-08
SMEL4.1_09g023240.1.01	1356.15	-1.81698	0.303062	-5.99541	2.02974e-09	9.93146e-08
SMEL4.1_09g023250.1.01	18.1563	-2.03831	0.767639	-2.65529	0.00792394	0.0401436
SMEL4.1_09g023380.1.01	318.654	-1.10377	0.33074	-3.33727	0.000846058	0.00708348
SMEL4.1_09g023830.1.01	1208.33	-2.58198	0.67972	-3.79858	0.000145525	0.00168704
SMEL4.1_09g024220.1.01	128.484	-1.89747	0.537879	-3.52769	0.000419199	0.00402521
SMEL4.1_09g024430.1.01	407.488	-1.35393	0.370299	-3.65631	0.000255876	0.00269101
SMEL4.1_09g024860.1.01	6.32945	-6.04099	2.01094	-3.00407	0.00266398	0.0173809
SMEL4.1_09g024920.1.01	2102.37	-1.13006	0.23026	-4.90774	9.21325e-07	2.37959e-05
SMEL4.1_09g024940.1.01	26.9558	-1.95445	0.483022	-4.0463	5.20341e-05	0.000724722
SMEL4.1_09g025060.1.01	41.0989	-1.98522	0.466195	-4.25834	2.05949e-05	0.000331758
SMEL4.1_09g025200.1.01	4.98682	-5.69528	1.56694	-3.63465	0.000278359	0.00287514
SMEL4.1_10g000390.1.01	58.9413	-1.50226	0.529674	-2.8362	0.00456533	0.0263626
SMEL4.1_10g000820.1.01	17.6027	-1.86971	0.549384	-3.40328	0.000665815	0.00584986
SMEL4.1_10g000850.1.01	8.538	-3.97859	1.32448	-3.00389	0.00266552	0.0173812
SMEL4.1_10g001100.1.01	5.12192	-4.72726	1.47897	-3.19632	0.00139191	0.0105011
SMEL4.1_10g001240.1.01	305.699	-2.39505	0.522334	-4.58529	4.53355e-06	9.22513e-05
SMEL4.1_10g001300.1.01	11.9913	-2.24683	0.679734	-3.30545	0.000948237	0.00773445
SMEL4.1_10g001390.1.01	407.425	-1.87092	0.617557	-3.02955	0.0024492	0.0162176
SMEL4.1_10g001500.1.01	178.569	-1.58523	0.420224	-3.77234	0.000161721	0.00184968
SMEL4.1_10g001600.1.01	780.975	-2.20512	0.548886	-4.01746	5.88298e-05	0.000801833
SMEL4.1_10g001620.1.01	153.302	-1.26504	0.362549	-3.4893	0.00048429	0.0045177
SMEL4.1_10g001630.1.01	6189.87	-3.0689	0.411678	-7.4546	9.01414e-14	9.8754e-12
SMEL4.1_10g001660.1.01	1248.66	-1.05173	0.372512	-2.82333	0.00475273	0.0272075
SMEL4.1_10g001680.1.01	1472.55	-6.04312	0.469263	-12.8779	5.99362e-38	3.74456e-35
SMEL4.1_10g001820.1.01	262.899	-2.03843	0.382735	-5.32596	1.0042e-07	3.3209e-06
SMEL4.1_10g001850.1.01	206.137	-1.14391	0.370892	-3.08421	0.00204093	0.0140537
SMEL4.1_10g001880.1.01	15.3044	-1.58188	0.553752	-2.85666	0.0042812	0.0250542
SMEL4.1_10g001940.1.01	95.673	-2.74152	0.713397	-3.84291	0.000121585	0.00145625
SMEL4.1_10g001960.1.01	214.315	-2.09179	0.783571	-2.66956	0.00759516	0.038914
SMEL4.1_10g002340.1.01	51.1579	-2.17944	0.694622	-3.1376	0.00170338	0.0122625
SMEL4.1_10g002540.1.01	397.558	-2.11154	0.52765	-4.00178	6.28666e-05	0.000846374
SMEL4.1_10g002790.1.01	3499.38	-1.27527	0.350152	-3.64203	0.000270494	0.00281782
SMEL4.1_10g002900.1.01	166.818	-2.73234	0.716175	-3.81519	0.000136078	0.00159917
SMEL4.1_10g002950.1.01	57.7874	-3.84308	0.95321	-4.03172	5.53698e-05	0.000760956
SMEL4.1_10g003160.1.01	1120.6	-1.48082	0.281812	-5.25463	1.48321e-07	4.64578e-06
SMEL4.1_10g003300.1.01	105.944	-1.11174	0.323491	-3.43669	0.000588866	0.00529855
SMEL4.1_10g003360.1.01	56.9057	-4.42809	1.09387	-4.0481	5.16344e-05	0.000721197
SMEL4.1_10g003580.1.01	147.944	-1.85225	0.661212	-2.8013	0.00508972	0.0286124
SMEL4.1_10g003960.1.01	404.77	-1.75249	0.517027	-3.38956	0.000700046	0.00609042
SMEL4.1_10g003970.1.01	92.12	-3.30492	0.96209	-3.43514	0.000592237	0.00531038
SMEL4.1_10g004450.1.01	86.3019	-1.30056	0.278191	-4.67505	2.93879e-06	6.43476e-05
SMEL4.1_10g004510.1.01	3179.19	-2.36941	0.450323	-5.26156	1.42836e-07	4.51065e-06
SMEL4.1_10g004930.1.01	117.012	-1.31848	0.282408	-4.6687	3.03113e-06	6.6164e-05
SMEL4.1_10g005940.1.01	350.055	-1.6546	0.438228	-3.77567	0.000159579	0.00183068
SMEL4.1_10g006030.1.01	22.2844	-1.85424	0.720561	-2.57332	0.0100728	0.048074
SMEL4.1_10g006060.1.01	54.7926	-1.47936	0.489804	-3.02031	0.00252512	0.0166313
SMEL4.1_10g007550.1.01	244.838	-3.48704	0.425624	-8.19276	2.55296e-16	3.80736e-14
SMEL4.1_10g007640.1.01	64.7489	-6.51668	0.823313	-7.9152	2.46854e-15	3.35663e-13
SMEL4.1_10g007720.1.01	20.1861	-6.7369	1.26665	-5.31867	1.04531e-07	3.43231e-06
SMEL4.1_10g008190.1.01	99.4872	-1.04415	0.369972	-2.82224	0.004769	0.0272872
SMEL4.1_10g008230.1.01	593.174	-1.84253	0.299685	-6.1482	7.83664e-10	4.22265e-08
SMEL4.1_10g008240.1.01	7.37584	-2.59173	0.892253	-2.9047	0.003676	0.0222216
SMEL4.1_10g008310.1.01	72.6295	-1.01903	0.358182	-2.84501	0.00444103	0.0258067
SMEL4.1_10g008380.1.01	858.707	-1.24539	0.414194	-3.00679	0.00264024	0.017265
SMEL4.1_10g009230.1.01	158.681	-1.66871	0.373309	-4.47006	7.8199e-06	0.000146963
SMEL4.1_10g009490.1.01	26.3157	-8.09239	1.29932	-6.22816	4.71948e-10	2.69357e-08
SMEL4.1_10g009500.1.01	7.40213	-6.26338	1.4409	-4.34685	1.38107e-05	0.000236832
SMEL4.1_10g009870.1.01	10.6467	-5.80227	1.34949	-4.29961	1.71101e-05	0.000283932
SMEL4.1_10g009890.1.01	45.4548	-5.68786	0.748013	-7.60396	2.872e-14	3.42212e-12
SMEL4.1_10g009900.1.01	20.4569	-5.8456	1.10979	-5.26729	1.38449e-07	4.39614e-06
SMEL4.1_10g010100.1.01	1136.48	-1.61271	0.438552	-3.67735	0.000235668	0.00252794
SMEL4.1_10g010110.1.01	80.5322	-3.70838	0.80841	-4.58725	4.49123e-06	9.15513e-05
SMEL4.1_10g011020.1.01	28.3628	-1.00367	0.384921	-2.60747	0.00912143	0.0446907
SMEL4.1_10g012110.1.01	8.85118	-6.52379	1.40733	-4.63559	3.55926e-06	7.55516e-05
SMEL4.1_10g012120.1.01	8.61227	-6.48315	1.38029	-4.69694	2.64085e-06	5.90956e-05
SMEL4.1_10g012270.1.01	2435.51	-1.08111	0.380755	-2.83938	0.00452017	0.0261554
SMEL4.1_10g012830.1.01	110.022	-1.15537	0.299729	-3.85473	0.000115858	0.0013978
SMEL4.1_10g012860.1.01	270.66	-1.31498	0.477247	-2.75534	0.00586321	0.0318978
SMEL4.1_10g012870.1.01	842.761	-1.55419	0.361834	-4.2953	1.74453e-05	0.000288666
SMEL4.1_10g013140.1.01	45.8444	-2.01026	0.608882	-3.30155	0.000961511	0.00782892
SMEL4.1_10g013220.1.01	74.3141	-1.16742	0.407693	-2.86349	0.00419002	0.0246705
SMEL4.1_10g013240.1.01	41.7711	-1.21757	0.470938	-2.58541	0.00972643	0.0468116
SMEL4.1_10g013360.1.01	145.234	-1.27073	0.482265	-2.63492	0.00841581	0.0420718
SMEL4.1_10g013670.1.01	316.288	-1.26837	0.222288	-5.70598	1.15677e-08	4.80068e-07
SMEL4.1_10g013960.1.01	9.50218	-6.62275	1.38432	-4.78412	1.71737e-06	4.1011e-05
SMEL4.1_10g014730.1.01	90.5499	-4.60015	0.8029	-5.72942	1.00774e-08	4.21246e-07
SMEL4.1_10g015030.1.01	1451.08	-1.1051	0.198582	-5.56497	2.62197e-08	1.02728e-06
SMEL4.1_10g015150.1.01	11.5561	-5.91734	1.55347	-3.80911	0.000139469	0.00163074
SMEL4.1_10g015160.1.01	40.1103	-1.68038	0.538312	-3.12157	0.00179887	0.0127828
SMEL4.1_10g015170.1.01	602.653	-1.50698	0.407557	-3.69758	0.000217664	0.00237112
SMEL4.1_10g015510.1.01	18.776	-1.83852	0.644902	-2.85085	0.00436025	0.0254331
SMEL4.1_10g015650.1.01	158.768	-2.76451	0.606536	-4.55786	5.16773e-06	0.000102806
SMEL4.1_10g015940.1.01	48.9717	-1.84695	0.482035	-3.83157	0.00012733	0.00151407
SMEL4.1_10g016000.1.01	1242.77	-1.86445	0.306689	-6.07926	1.20737e-09	6.2298e-08
SMEL4.1_10g016270.1.01	8.49184	-4.49339	1.40759	-3.19227	0.00141159	0.0106135
SMEL4.1_10g016430.1.01	1235	-2.87933	0.610537	-4.71606	2.40458e-06	5.43877e-05
SMEL4.1_10g016970.1.01	1332.71	-1.17344	0.247062	-4.74957	2.03848e-06	4.70563e-05
SMEL4.1_10g017060.1.01	88.613	-2.81042	0.821805	-3.41981	0.000626645	0.00556366
SMEL4.1_10g017730.1.01	10.7788	-5.82102	1.77178	-3.28542	0.00101832	0.00818429
SMEL4.1_10g018240.1.01	40.8233	-2.3526	0.673792	-3.49158	0.000480169	0.00448468
SMEL4.1_10g018450.1.01	9.97945	-3.41963	1.15926	-2.94983	0.00317945	0.0198746
SMEL4.1_10g018510.1.01	375.481	-3.4703	0.418633	-8.2896	1.13629e-16	1.77476e-14
SMEL4.1_10g018550.1.01	2532.58	-1.5466	0.471976	-3.27687	0.00104965	0.00838121
SMEL4.1_10g018660.1.01	25.2041	-2.0281	0.750052	-2.70395	0.00685205	0.035921
SMEL4.1_10g018840.1.01	338.889	-1.67858	0.259103	-6.47844	9.26761e-11	6.13839e-09
SMEL4.1_10g019310.1.01	655.864	-1.48672	0.332838	-4.4668	7.93973e-06	0.000148973
SMEL4.1_10g019730.1.01	2719.25	-1.37209	0.474749	-2.89014	0.00385066	0.023114
SMEL4.1_10g020050.1.01	126.633	-1.00971	0.392975	-2.56939	0.0101878	0.0485071
SMEL4.1_10g020210.1.01	75.9989	-1.16106	0.391893	-2.9627	0.00304949	0.0192496
SMEL4.1_10g020380.1.01	287.507	-9.683	1.04701	-9.24823	2.28245e-20	5.49595e-18
SMEL4.1_10g020560.1.01	180.588	-1.3768	0.536742	-2.56511	0.0103142	0.0489175
SMEL4.1_10g020720.1.01	835.374	-1.40032	0.25827	-5.42193	5.89605e-08	2.07764e-06
SMEL4.1_10g020760.1.01	758.737	-1.02699	0.184745	-5.55895	2.7141e-08	1.05444e-06
SMEL4.1_10g020810.1.01	69.4175	-1.99627	0.390111	-5.11718	3.10135e-07	9.06331e-06
SMEL4.1_10g020830.1.01	116.468	-1.86582	0.414914	-4.49687	6.896e-06	0.000130662
SMEL4.1_10g020950.1.01	116.538	-2.5504	0.539047	-4.73131	2.2307e-06	5.08029e-05
SMEL4.1_10g020990.1.01	3849.1	-2.62793	0.683297	-3.84596	0.000120083	0.00143901
SMEL4.1_10g022270.1.01	229.816	-1.12684	0.356029	-3.16502	0.00155071	0.0114014
SMEL4.1_10g022780.1.01	4.29729	-3.52561	1.36118	-2.59011	0.00959445	0.0463695
SMEL4.1_10g022880.1.01	39.9804	-3.17719	0.56102	-5.66323	1.48551e-08	6.06699e-07
SMEL4.1_10g022950.1.01	382.023	-3.0933	0.917163	-3.37268	0.000744393	0.00637783
SMEL4.1_10g023320.1.01	433.544	-3.56714	0.494111	-7.21932	5.22489e-13	5.22851e-11
SMEL4.1_10g023420.1.01	481.523	-1.61457	0.452184	-3.57059	0.000356174	0.00352454
SMEL4.1_10g023730.1.01	44.3159	-2.07069	0.483465	-4.28302	1.84373e-05	0.000301625
SMEL4.1_10g024090.1.01	33.4679	-2.4896	0.469327	-5.30462	1.12905e-07	3.67078e-06
SMEL4.1_10g024110.1.01	57.5347	-2.08625	0.624375	-3.34134	0.000833761	0.00699514
SMEL4.1_10g024350.1.01	30470.1	-3.01001	0.598513	-5.02914	4.92684e-07	1.38215e-05
SMEL4.1_10g024610.1.01	83.7613	-1.10127	0.321171	-3.4289	0.000606025	0.0054172
SMEL4.1_10g025240.1.01	1001.67	-1.51394	0.249629	-6.06474	1.32164e-09	6.72653e-08
SMEL4.1_10g025290.1.01	884.777	-1.65938	0.36841	-4.50416	6.66351e-06	0.000127406
SMEL4.1_10g025660.1.01	276.155	-2.75498	0.706051	-3.90195	9.54202e-05	0.00119518
SMEL4.1_10g025850.1.01	7.73335	-2.6663	0.96162	-2.77272	0.00555895	0.030559
SMEL4.1_10g026040.1.01	1234.65	-1.27734	0.298402	-4.28061	1.86385e-05	0.00030427
SMEL4.1_10g026130.1.01	66.5886	-1.23811	0.308963	-4.00732	6.14119e-05	0.000831633
SMEL4.1_10g026650.1.01	899.555	-2.41136	0.63138	-3.81919	0.00013389	0.00157908
SMEL4.1_10g026840.1.01	13.9257	-5.27879	1.28846	-4.09699	4.18564e-05	0.000604343
SMEL4.1_10g026850.1.01	95.507	-8.98914	1.21971	-7.36988	1.70785e-13	1.79449e-11
SMEL4.1_10g026990.1.01	79.4889	-2.10778	0.577486	-3.64993	0.000262315	0.00274748
SMEL4.1_10g027160.1.01	5993.69	-1.46703	0.329468	-4.45272	8.47902e-06	0.00015743
SMEL4.1_10g027300.1.01	92.5142	-1.07181	0.338508	-3.16627	0.00154407	0.011378
SMEL4.1_11g000250.1.01	29.281	-2.15458	0.616291	-3.49604	0.000472218	0.00443371
SMEL4.1_11g000320.1.01	678.759	-1.79738	0.292232	-6.15053	7.72264e-10	4.18072e-08
SMEL4.1_11g000410.1.01	2346.58	-1.76723	0.336033	-5.25909	1.44773e-07	4.55471e-06
SMEL4.1_11g000460.1.01	360.225	-1.7316	0.476246	-3.63594	0.000276973	0.00286641
SMEL4.1_11g000470.1.01	12.619	-2.1414	0.830853	-2.57735	0.00995625	0.0476301
SMEL4.1_11g000920.1.01	306.092	-1.16681	0.383487	-3.04263	0.00234522	0.0157069
SMEL4.1_11g001290.1.01	124.884	-1.88673	0.452675	-4.16796	3.07332e-05	0.000464636
SMEL4.1_11g001350.1.01	552.464	-1.2531	0.316399	-3.9605	7.47928e-05	0.000975133
SMEL4.1_11g001740.1.01	32.6654	-1.14404	0.398581	-2.87029	0.00410097	0.0242512
SMEL4.1_11g001770.1.01	14.4881	-2.96857	1.14165	-2.60024	0.00931599	0.0453651
SMEL4.1_11g001780.1.01	5.23178	-5.75869	1.72326	-3.34175	0.00083253	0.00698793
SMEL4.1_11g001840.1.01	67.6084	-3.13104	0.89558	-3.49611	0.0004721	0.00443371
SMEL4.1_11g002750.1.01	42.4585	-1.0451	0.407202	-2.56653	0.0102721	0.0487677
SMEL4.1_11g003580.1.01	5.71441	-3.33857	1.2871	-2.59386	0.00949059	0.0460022
SMEL4.1_11g003650.1.01	1531.05	-1.0927	0.283797	-3.8503	0.000117972	0.00142033
SMEL4.1_11g003900.1.01	716.056	-1.27079	0.27261	-4.66157	3.138e-06	6.79832e-05
SMEL4.1_11g003980.1.01	1490.31	-3.44507	0.342076	-10.0711	7.41692e-24	2.34862e-21
SMEL4.1_11g004110.1.01	176.18	-2.07416	0.358522	-5.7853	7.2383e-09	3.12165e-07
SMEL4.1_11g004150.1.01	586.138	-1.10251	0.355419	-3.10199	0.00192224	0.013465
SMEL4.1_11g004280.1.01	2179.83	-1.34537	0.274576	-4.8998	9.59352e-07	2.46131e-05
SMEL4.1_11g004350.1.01	5.73678	-5.89787	1.56573	-3.76685	0.000165319	0.00188531
SMEL4.1_11g004390.1.01	2935.99	-1.31224	0.430634	-3.04723	0.00230963	0.0154986
SMEL4.1_11g004420.1.01	92.444	-2.99628	0.692905	-4.32424	1.53062e-05	0.000259207
SMEL4.1_11g004660.1.01	61.4944	-2.2705	0.739921	-3.06857	0.00215087	0.0146544
SMEL4.1_11g004820.1.01	1320.29	-1.28399	0.299192	-4.29154	1.77439e-05	0.000292679
SMEL4.1_11g005040.1.01	739.721	-1.12454	0.170028	-6.61384	3.7447e-11	2.70507e-09
SMEL4.1_11g005200.1.01	21.8747	-3.09323	0.623794	-4.95874	7.09517e-07	1.88954e-05
SMEL4.1_11g005380.1.01	49.2709	-7.13775	1.1024	-6.47475	9.4972e-11	6.27249e-09
SMEL4.1_11g005400.1.01	89.9369	-9.86603	1.20735	-8.17167	3.04157e-16	4.50699e-14
SMEL4.1_11g005420.1.01	123.754	-7.87824	0.87333	-9.02092	1.86515e-19	3.88422e-17
SMEL4.1_11g005430.1.01	4.26691	-5.46355	1.75702	-3.10955	0.00187372	0.0131891
SMEL4.1_11g005450.1.01	30.0337	-8.28398	1.28404	-6.45149	1.10756e-10	7.19165e-09
SMEL4.1_11g005480.1.01	103.535	-7.62932	0.904312	-8.4366	3.26707e-17	5.43321e-15
SMEL4.1_11g005490.1.01	14.2487	-7.20918	1.32696	-5.43286	5.54577e-08	1.97225e-06
SMEL4.1_11g005500.1.01	20.7161	-7.74759	1.28175	-6.04455	1.49826e-09	7.54548e-08
SMEL4.1_11g005510.1.01	26.6446	-1.88963	0.55241	-3.42069	0.000624614	0.00555329
SMEL4.1_11g005620.1.01	758.405	-1.65493	0.643084	-2.57343	0.0100696	0.048073
SMEL4.1_11g005930.1.01	95.2953	-5.262	0.575699	-9.14019	6.23419e-20	1.41284e-17
SMEL4.1_11g006000.1.01	658.034	-1.85752	0.391962	-4.73904	2.14738e-06	4.92816e-05
SMEL4.1_11g006120.1.01	10.2842	-3.74577	0.974806	-3.84258	0.000121748	0.00145669
SMEL4.1_11g006130.1.01	91.0809	-2.92588	0.641943	-4.55785	5.16787e-06	0.000102806
SMEL4.1_11g006200.1.01	8.2825	-6.424	1.52521	-4.21188	2.53249e-05	0.000392892
SMEL4.1_11g006220.1.01	8.71285	-2.85754	0.870063	-3.28429	0.00102239	0.00820611
SMEL4.1_11g006260.1.01	51.8726	-1.53266	0.337906	-4.53576	5.7397e-06	0.000111965
SMEL4.1_11g006270.1.01	68.2643	-1.26462	0.347737	-3.63673	0.000276126	0.00286102
SMEL4.1_11g006320.1.01	55.0041	-1.14999	0.315515	-3.6448	0.000267595	0.00279391
SMEL4.1_11g006680.1.01	5.94854	-5.94859	1.72019	-3.45811	0.000543982	0.00496631
SMEL4.1_11g006840.1.01	1206.69	-7.13644	0.372326	-19.1672	6.95451e-82	3.21521e-78
SMEL4.1_11g006910.1.01	1373.26	-2.12075	0.609256	-3.48088	0.000499766	0.00463587
SMEL4.1_11g007100.1.01	23.4553	-3.66137	0.842364	-4.34655	1.38297e-05	0.000236982
SMEL4.1_11g007160.1.01	10.5862	-6.77613	1.49549	-4.53105	5.86915e-06	0.000114105
SMEL4.1_11g008030.1.01	266.96	-1.21707	0.340248	-3.57701	0.000347545	0.00345393
SMEL4.1_11g008140.1.01	50.4594	-2.41178	0.41738	-5.77837	7.54272e-09	3.22884e-07
SMEL4.1_11g009300.1.01	1526.11	-1.09589	0.35604	-3.078	0.00208393	0.0142902
SMEL4.1_11g009470.1.01	3660.55	-1.22395	0.349296	-3.50404	0.000458258	0.00431842
SMEL4.1_11g010350.1.01	434.791	-1.21668	0.298165	-4.08056	4.49273e-05	0.000641867
SMEL4.1_11g010410.1.01	33.4815	-2.27369	0.759859	-2.99224	0.00276934	0.0178816
SMEL4.1_11g011930.1.01	911.415	-1.16259	0.261938	-4.43844	9.06128e-06	0.000167167
SMEL4.1_11g011940.1.01	21.5464	-4.91401	1.18581	-4.14401	3.41285e-05	0.000508138
SMEL4.1_11g012180.1.01	1753.11	-1.1313	0.303495	-3.72759	0.000193323	0.00214333
SMEL4.1_11g012540.1.01	169.83	-1.0116	0.310987	-3.25287	0.00114247	0.00897668
SMEL4.1_11g014050.1.01	4.78178	-3.65387	1.29851	-2.81389	0.00489453	0.0278332
SMEL4.1_11g014330.1.01	137.973	-2.18197	0.468754	-4.65482	3.24258e-06	6.99864e-05
SMEL4.1_11g014630.1.01	24.739	-1.85962	0.614114	-3.02813	0.00246075	0.0162754
SMEL4.1_11g014820.1.01	397.071	-1.29432	0.303714	-4.26163	2.02938e-05	0.000327363
SMEL4.1_11g015090.1.01	3.26706	-5.07818	1.81711	-2.79464	0.00519576	0.0290622
SMEL4.1_11g015150.1.01	41.7251	-8.75786	1.25252	-6.99222	2.70573e-12	2.36915e-10
SMEL4.1_11g015310.1.01	5400.79	-2.03588	0.474013	-4.29498	1.74706e-05	0.000288877
SMEL4.1_11g017370.1.01	351.262	-1.05895	0.201225	-5.26252	1.4209e-07	4.49324e-06
SMEL4.1_11g017610.1.01	2.49978	-4.69901	1.77278	-2.65065	0.0080338	0.0405568
SMEL4.1_11g017750.1.01	83.0906	-1.23011	0.472913	-2.60113	0.00929176	0.0452758
SMEL4.1_11g017860.1.01	4416.28	-1.64629	0.418989	-3.92919	8.52328e-05	0.00108613
SMEL4.1_11g018120.1.01	147.462	-1.68338	0.453818	-3.70937	0.000207776	0.00227844
SMEL4.1_11g018760.1.01	587.525	-2.13524	0.406744	-5.2496	1.52433e-07	4.75235e-06
SMEL4.1_11g018830.1.01	167.707	-1.63149	0.587646	-2.77632	0.00549789	0.0302848
SMEL4.1_11g018880.1.01	715.127	-1.22997	0.262858	-4.67921	2.87989e-06	6.33412e-05
SMEL4.1_11g018890.1.01	2069.33	-4.06476	0.409566	-9.92456	3.2554e-23	9.90156e-21
SMEL4.1_11g019230.1.01	551.805	-1.56955	0.5524	-2.84133	0.00449264	0.0260607
SMEL4.1_11g019590.1.01	208.882	-1.30201	0.414395	-3.14195	0.00167826	0.0121233
SMEL4.1_11g019700.1.01	228.457	-3.072	0.490569	-6.26211	3.79797e-10	2.22827e-08
SMEL4.1_11g019710.1.01	29.035	-3.13423	0.568816	-5.5101	3.58628e-08	1.33066e-06
SMEL4.1_11g019750.1.01	11.6743	-6.92247	1.53235	-4.51755	6.25592e-06	0.00012061
SMEL4.1_11g019790.1.01	41.5354	-7.78389	1.22653	-6.34629	2.2057e-10	1.35603e-08
SMEL4.1_11g020030.1.01	28.1428	-2.39727	0.456887	-5.24697	1.54617e-07	4.7975e-06
SMEL4.1_11g020050.1.01	38.6025	-6.19811	0.954587	-6.49298	8.41545e-11	5.6223e-09
SMEL4.1_11g020070.1.01	4.59847	-4.55316	1.46501	-3.10795	0.00188392	0.0132487
SMEL4.1_11g020080.1.01	3.37381	-5.12631	1.66855	-3.07231	0.00212406	0.0145222
SMEL4.1_11g020440.1.01	263.035	-1.26251	0.451387	-2.79694	0.00515884	0.0289025
SMEL4.1_11g020770.1.01	1434.45	-1.60768	0.406734	-3.95264	7.72923e-05	0.00100376
SMEL4.1_11g021580.1.01	332.422	-1.01832	0.330428	-3.08184	0.00205729	0.0141537
SMEL4.1_11g021770.1.01	562.776	-2.03058	0.474454	-4.27983	1.87034e-05	0.0003049
SMEL4.1_11g021930.1.01	55.5111	-1.07131	0.321829	-3.32882	0.00087214	0.00725977
SMEL4.1_11g022260.1.01	14.6845	-7.2486	1.36786	-5.29923	1.16294e-07	3.75978e-06
SMEL4.1_11g022270.1.01	252.522	-1.20956	0.471898	-2.56319	0.0103716	0.0490334
SMEL4.1_11g022610.1.01	438.328	-1.23427	0.383681	-3.21692	0.00129575	0.00990604
SMEL4.1_11g022870.1.01	28.2103	-7.22082	1.27354	-5.6699	1.42883e-08	5.86943e-07
SMEL4.1_11g022880.1.01	32.0618	-7.40873	1.24013	-5.97415	2.31286e-09	1.11383e-07
SMEL4.1_11g022890.1.01	4.78465	-5.63642	1.66817	-3.37881	0.000728001	0.00628867
SMEL4.1_11g023190.1.01	623.44	-1.47866	0.407806	-3.6259	0.00028796	0.00294926
SMEL4.1_11g023440.1.01	99.4656	-1.90514	0.557717	-3.41596	0.000635584	0.00562487
SMEL4.1_11g023630.1.01	90.1711	-1.55492	0.50284	-3.09228	0.00198628	0.0137694
SMEL4.1_11g023840.1.01	294.428	-2.37902	0.528554	-4.50099	6.7637e-06	0.000128683
SMEL4.1_11g024300.1.01	69.8506	-2.62459	0.644777	-4.07053	4.69063e-05	0.000665614
SMEL4.1_11g024310.1.01	137.088	-2.51098	0.567517	-4.42451	9.66631e-06	0.000177057
SMEL4.1_11g024360.1.01	105.981	-2.92729	0.779952	-3.75317	0.000174616	0.00196774
SMEL4.1_11g024410.1.01	74.5045	-6.39912	0.765581	-8.35851	6.35147e-17	1.01256e-14
SMEL4.1_11g024450.1.01	20.2637	-7.71444	1.29812	-5.9428	2.80194e-09	1.31646e-07
SMEL4.1_11g024480.1.01	13.1949	-5.21247	1.18964	-4.38156	1.17831e-05	0.0002084
SMEL4.1_11g024750.1.01	5.03278	-3.77314	1.47143	-2.56427	0.0103394	0.0489966
SMEL4.1_11g024930.1.01	98.9438	-1.56183	0.284864	-5.48273	4.18812e-08	1.52701e-06
SMEL4.1_11g024970.1.01	153.7	-1.10595	0.254107	-4.35228	1.34731e-05	0.000232595
SMEL4.1_11g024990.1.01	770.787	-1.81535	0.308725	-5.88015	4.09895e-09	1.86656e-07
SMEL4.1_11g025030.1.01	15.326	-6.33369	1.30356	-4.85877	1.18115e-06	2.93585e-05
SMEL4.1_11g025040.1.01	11.0002	-4.92308	1.21885	-4.03912	5.36512e-05	0.000742038
SMEL4.1_11g025690.1.01	4128.39	-3.36728	0.323019	-10.4244	1.91867e-25	6.6197e-23
SMEL4.1_11g025720.1.01	98.6723	-2.27725	0.322355	-7.06442	1.61292e-12	1.46788e-10
SMEL4.1_11g026050.1.01	1325.49	-1.49284	0.299667	-4.98165	6.30448e-07	1.72263e-05
SMEL4.1_11g026330.1.01	164.559	-1.21785	0.294914	-4.12953	3.63513e-05	0.000535562
SMEL4.1_11g026440.1.01	569.21	-2.36045	0.719479	-3.28078	0.0010352	0.00828877
SMEL4.1_11g026920.1.01	8.92686	-2.24092	0.777022	-2.88399	0.00392674	0.0234549
SMEL4.1_11g027000.1.01	35.3928	-2.965	0.79189	-3.74421	0.000180966	0.00202381
SMEL4.1_11g027040.1.01	311.609	-1.86707	0.451384	-4.13632	3.52913e-05	0.000522274
SMEL4.1_11g027480.1.01	79.9995	-1.68286	0.41405	-4.0644	4.81569e-05	0.000682075
SMEL4.1_12g000190.1.01	11.3392	-2.63152	0.844428	-3.11633	0.00183117	0.0129487
SMEL4.1_12g000260.1.01	25.2075	-4.08077	0.739873	-5.5155	3.4779e-08	1.30089e-06
SMEL4.1_12g000320.1.01	5.00275	-5.69948	1.59085	-3.58267	0.000340105	0.00338874
SMEL4.1_12g000620.1.01	13355.7	-2.04492	0.570493	-3.58447	0.000337761	0.00336828
SMEL4.1_12g000670.1.01	293.999	-2.28128	0.479665	-4.75599	1.97472e-06	4.5785e-05
SMEL4.1_12g000680.1.01	235.621	-2.76514	0.42087	-6.57006	5.02934e-11	3.53369e-09
SMEL4.1_12g000740.1.01	273.387	-2.50358	0.503376	-4.97357	6.57294e-07	1.78124e-05
SMEL4.1_12g000750.1.01	695.96	-1.48013	0.276657	-5.35005	8.79316e-08	2.95011e-06
SMEL4.1_12g000800.1.01	72.7961	-2.43504	0.71768	-3.39293	0.000691484	0.0060341
SMEL4.1_12g000940.1.01	3630.85	-3.03915	0.367167	-8.27729	1.26012e-16	1.94193e-14
SMEL4.1_12g001000.1.01	3799.99	-1.39122	0.507347	-2.74215	0.00610386	0.0328514
SMEL4.1_12g001280.1.01	472.82	-1.50685	0.361342	-4.17016	3.04391e-05	0.000460793
SMEL4.1_12g001530.1.01	40.3065	-3.66479	0.751946	-4.87374	1.09503e-06	2.74541e-05
SMEL4.1_12g001540.1.01	205.016	-1.05879	0.339317	-3.12037	0.00180626	0.0128157
SMEL4.1_12g001610.1.01	94.0785	-5.28128	0.886312	-5.95872	2.54226e-09	1.20919e-07
SMEL4.1_12g001640.1.01	332.598	-1.91898	0.368205	-5.21172	1.87098e-07	5.72084e-06
SMEL4.1_12g001680.1.01	581.759	-1.28773	0.283855	-4.53658	5.71727e-06	0.000111716
SMEL4.1_12g001740.1.01	2441.64	-1.35183	0.419522	-3.22231	0.00127159	0.00973735
SMEL4.1_12g001910.1.01	64.4439	-3.29391	0.511155	-6.44405	1.16327e-10	7.51121e-09
SMEL4.1_12g002600.1.01	19.6687	-1.40776	0.513279	-2.74268	0.00609397	0.032851
SMEL4.1_12g003010.1.01	19.3381	-3.49071	0.849326	-4.10998	3.95699e-05	0.000577097
SMEL4.1_12g003020.1.01	1392.74	-2.16081	0.544254	-3.97022	7.18064e-05	0.000944505
SMEL4.1_12g003030.1.01	569.441	-1.56068	0.270193	-5.77618	7.64158e-09	3.26512e-07
SMEL4.1_12g003150.1.01	8.2311	-2.74067	1.07009	-2.56116	0.0104323	0.0492652
SMEL4.1_12g003430.1.01	78.2351	-2.60925	0.363104	-7.18596	6.6739e-13	6.50945e-11
SMEL4.1_12g003510.1.01	89.7741	-2.41265	0.439379	-5.49104	3.99578e-08	1.46369e-06
SMEL4.1_12g003580.1.01	174.332	-1.4761	0.28434	-5.19132	2.08805e-07	6.32599e-06
SMEL4.1_12g003690.1.01	194.675	-1.06321	0.380698	-2.79279	0.00522556	0.0291843
SMEL4.1_12g004140.1.01	7.47128	-3.29228	1.20718	-2.72724	0.00638666	0.0340406
SMEL4.1_12g005720.1.01	399.044	-2.57342	0.858772	-2.99663	0.00272981	0.0176856
SMEL4.1_12g007330.1.01	48.8351	-3.35057	1.06485	-3.14652	0.00165229	0.0119994
SMEL4.1_12g007930.1.01	26.1684	-1.2556	0.472683	-2.65633	0.0078996	0.0400647
SMEL4.1_12g008030.1.01	1132.59	-1.11064	0.306737	-3.62083	0.000293659	0.00299177
SMEL4.1_12g008170.1.01	3.29427	-5.09594	1.75124	-2.90991	0.00361536	0.0219515
SMEL4.1_12g009820.1.01	15.8713	-6.38946	1.44659	-4.41692	1.00115e-05	0.000182513
SMEL4.1_12g010650.1.01	4717.91	-2.27189	0.417107	-5.44677	5.12914e-08	1.83822e-06
SMEL4.1_12g010940.1.01	142.234	-1.77403	0.390084	-4.54783	5.42031e-06	0.000106908
SMEL4.1_12g011580.1.01	187.681	-1.33547	0.33036	-4.04246	5.28926e-05	0.000733614
SMEL4.1_12g011710.1.01	79.1474	-5.62593	0.612525	-9.18481	4.12267e-20	9.62623e-18
SMEL4.1_12g012050.1.01	2.8995	-4.91593	1.86818	-2.6314	0.00850343	0.0424066
SMEL4.1_12g012350.1.01	27.3054	-1.77147	0.547476	-3.23571	0.0012134	0.00942509
SMEL4.1_12g012710.1.01	142.202	-1.34226	0.422486	-3.17704	0.00148786	0.0110839
SMEL4.1_12g012740.1.01	29.8214	-2.53997	0.79559	-3.19256	0.00141016	0.0106077
SMEL4.1_12g012900.1.01	1277.06	-1.16875	0.307233	-3.80411	0.000142313	0.00165645
SMEL4.1_12g012950.1.01	1242.98	-1.45601	0.364995	-3.98912	6.63182e-05	0.000880535
SMEL4.1_12g013010.1.01	43.4849	-4.44982	0.808922	-5.50093	3.77788e-08	1.39078e-06
SMEL4.1_12g013040.1.01	53.4714	-1.36726	0.423688	-3.22704	0.00125076	0.00962759
SMEL4.1_12g013460.1.01	77.5021	-1.13895	0.293258	-3.88378	0.000102847	0.00127406
SMEL4.1_12g013530.1.01	389.325	-2.4958	0.254273	-9.81545	9.66037e-23	2.7569e-20
SMEL4.1_12g013650.1.01	112.471	-2.50505	0.57625	-4.34716	1.37914e-05	0.000236791
SMEL4.1_12g014530.1.01	2112.86	-1.61498	0.613632	-2.63185	0.00849223	0.0423713
SMEL4.1_12g014810.1.01	10.8775	-3.55624	1.00646	-3.53343	0.000410206	0.00394792
SMEL4.1_12g014940.1.01	383.217	-1.10584	0.294233	-3.75838	0.000171015	0.00193694
SMEL4.1_12g014950.1.01	9.89428	-4.13273	1.25763	-3.28613	0.00101573	0.00817998
SMEL4.1_12g015250.1.01	2457.95	-2.64083	0.418206	-6.31466	2.70755e-10	1.64704e-08
SMEL4.1_12g015610.1.01	7057.77	-2.19703	0.599938	-3.6621	0.000250156	0.00264529
SMEL4.1_12g015620.1.01	527.178	-1.25187	0.333384	-3.75505	0.000173305	0.00195516
SMEL4.1_12g016260.1.01	2395.91	-1.58029	0.408727	-3.86638	0.000110464	0.00134963
SMEL4.1_12g016380.1.01	26.5188	-3.82027	0.823278	-4.64031	3.47881e-06	7.41163e-05
SMEL4.1_12g016680.1.01	20.2283	-2.33566	0.667927	-3.49687	0.00047075	0.00442352
SMEL4.1_12g016750.1.01	249.499	-1.09516	0.379014	-2.88949	0.00385864	0.0231318
SMEL4.1_12g017000.1.01	85.4746	-1.79372	0.536528	-3.34319	0.000828203	0.00696426
SMEL4.1_12g017020.1.01	103.375	-3.11371	0.542621	-5.73827	9.56494e-09	4.03473e-07
SMEL4.1_12g017100.1.01	32.1307	-2.22148	0.699811	-3.1744	0.00150146	0.0111744
SMEL4.1_12g017110.1.01	550.225	-1.65508	0.378787	-4.36941	1.24581e-05	0.000218168
SMEL4.1_12g017350.1.01	788.387	-1.37073	0.206905	-6.62494	3.474e-11	2.5174e-09
SMEL4.1_12g017400.1.01	653.651	-1.40591	0.463239	-3.03495	0.00240577	0.0159988
SMEL4.1_12g017410.1.01	132.718	-1.60877	0.364391	-4.41494	1.01037e-05	0.000183904
SMEL4.1_12g017630.1.01	532.468	-2.00584	0.449737	-4.46004	8.19443e-06	0.000153007
SMEL4.1_12g017670.1.01	4.76386	-5.62692	1.92509	-2.92293	0.0034675	0.021233
SMEL4.1_12g017740.1.01	10.4481	-4.25344	1.28916	-3.29939	0.000968958	0.00787845
SMEL4.1_12g018150.1.01	20.4457	-2.16225	0.813788	-2.65702	0.00788356	0.0400198
SMEL4.1_12g018370.1.01	105.443	-5.44351	0.713957	-7.62443	2.45113e-14	2.98394e-12
SMEL4.1_12g018380.1.01	119.059	-6.2551	0.722299	-8.65999	4.71818e-18	8.52075e-16
